# Supplementary material for: Chemical Diversity and Classification of Secondary Metabolites in Nine Bryophyte Species
Source: MDPI journal article supplement (doi:10.3390/metabo9100222), 2019-10-11

**(a)**

## Lactones

*Brachythecium rutabulum*

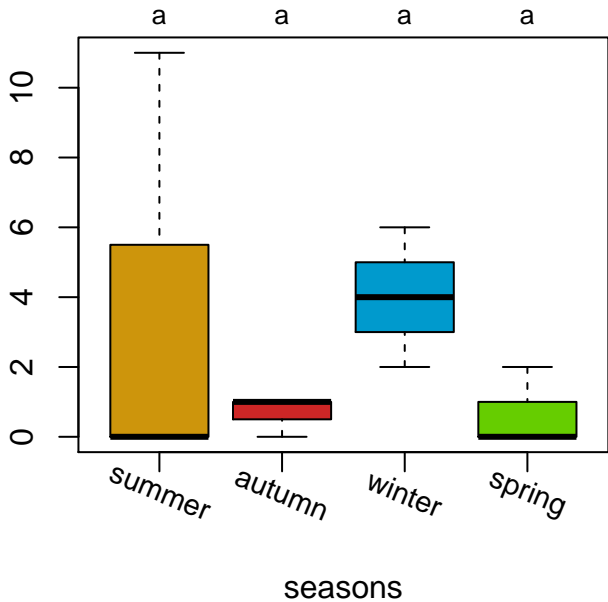

**(b)**

# Anthocyanins

*Fissidens taxifolius*

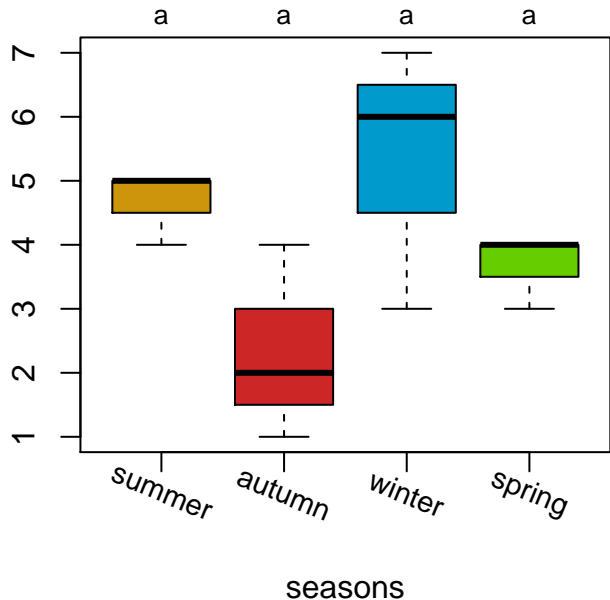

**(c)**

# Sesquiterpenoids

*Grimmia pulvinata*

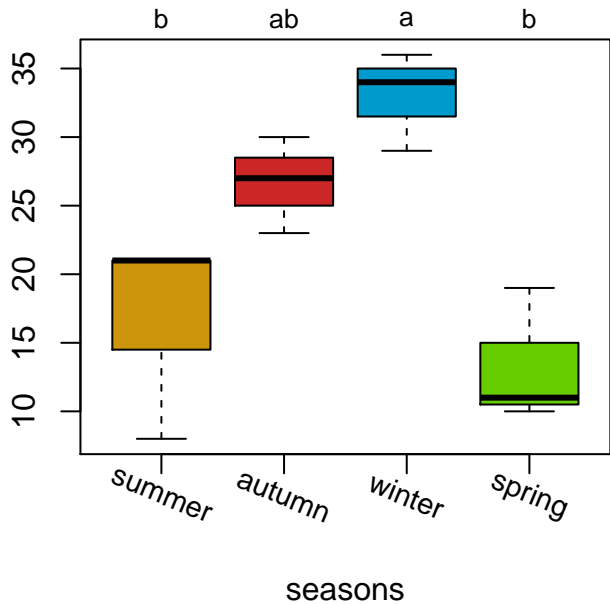

**(d)**

# Lignans, neolignans and related compounds

*Marchantia polymorpha*

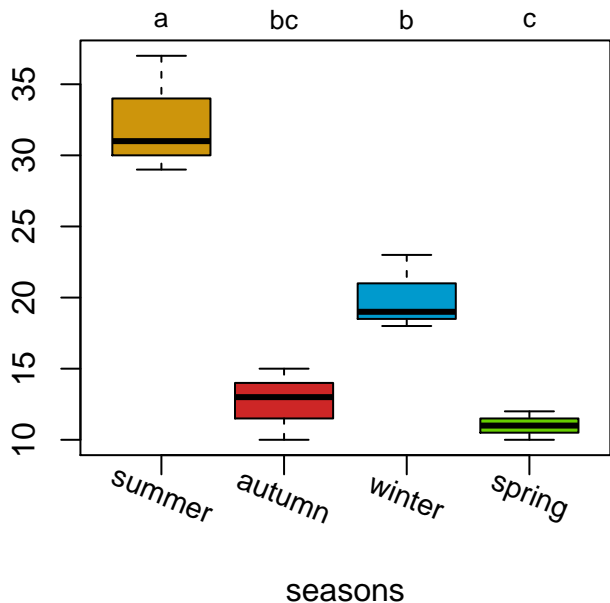

**(e)**

## Stilbenes

*Marchantia polymorpha*

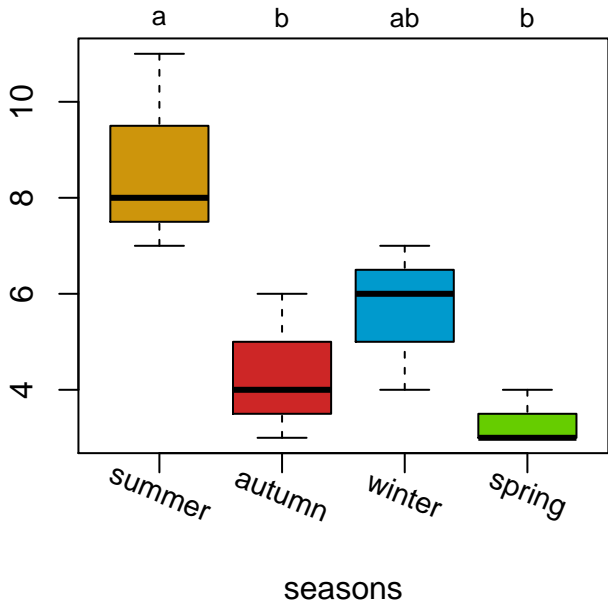

**(f)**

# Methoxyphenols

*Marchantia polymorpha*

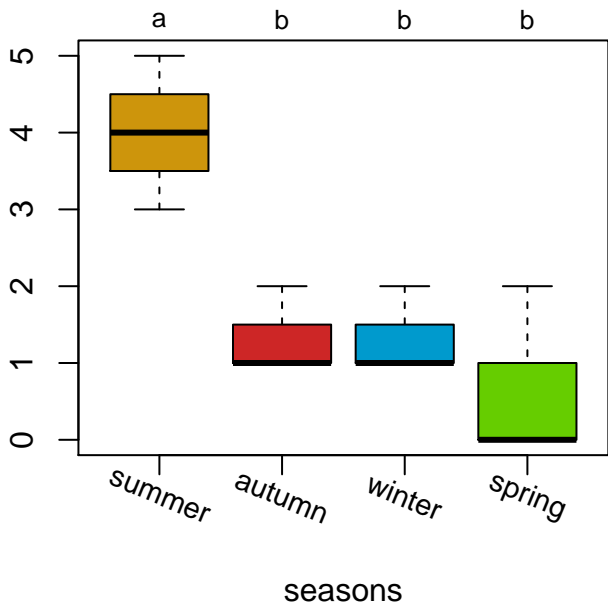

**(g)**

# Anthocyanins

*Marchantia polymorpha*

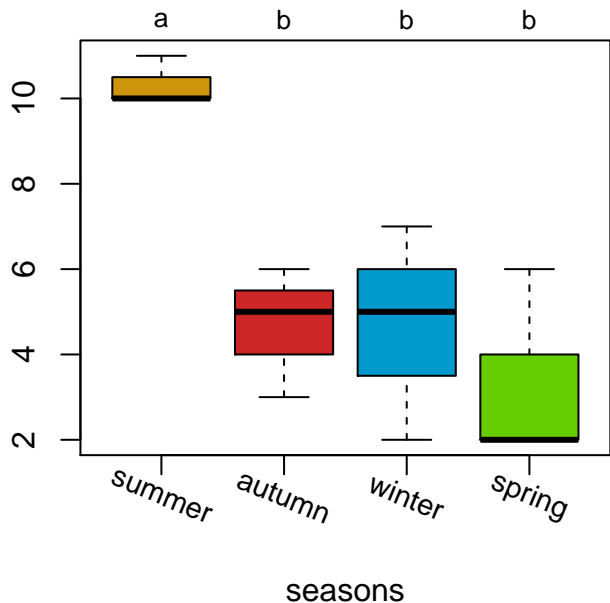

(h)

## Lactones

*Marchantia polymorpha*

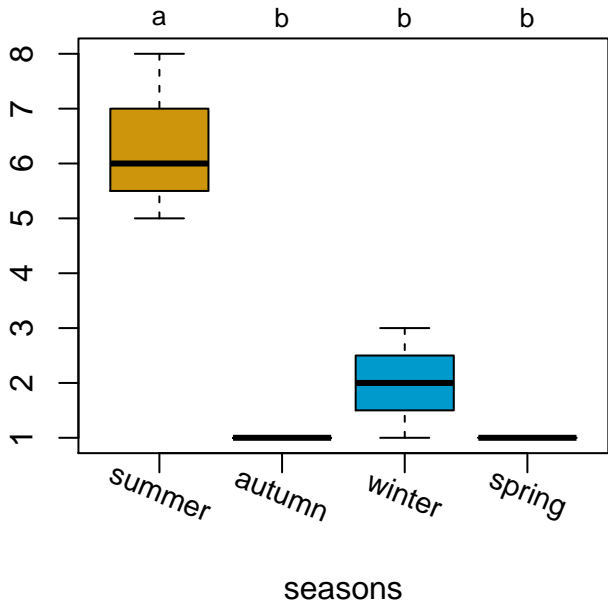



(i)

## Lactones

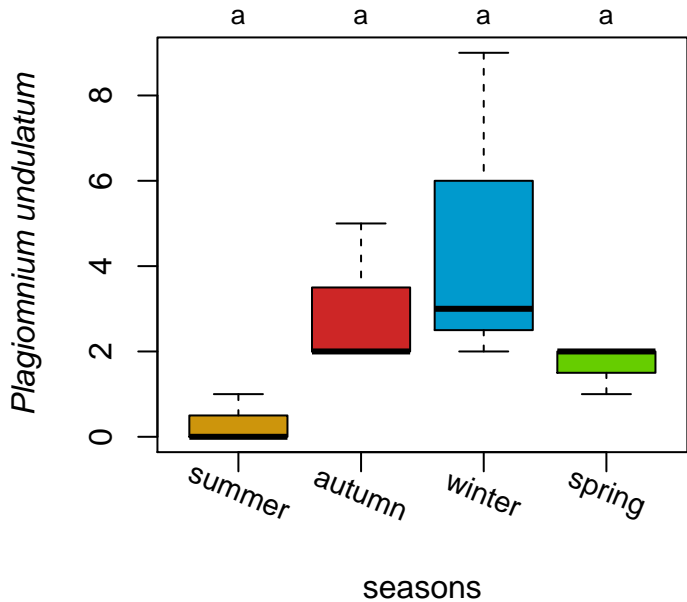

(j)

## Carbohydrates and carbohydrate conjugates

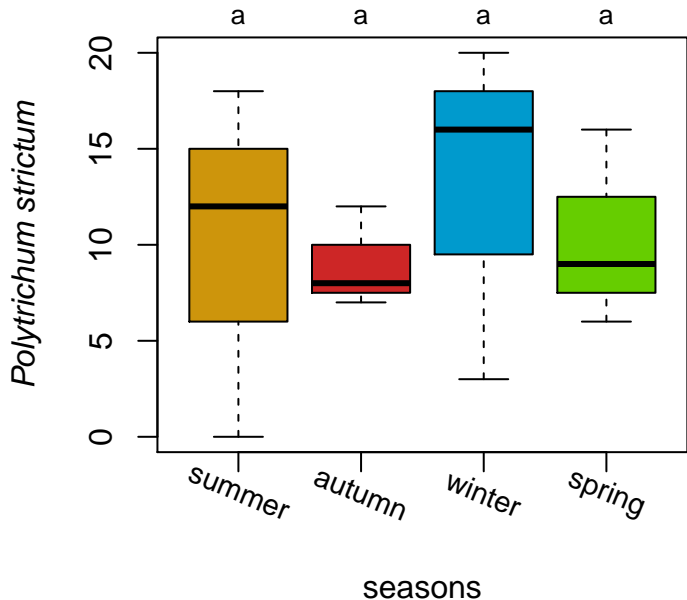

Supplement: s1 [file s1]
