# Supplementary material for: Chemical Diversity and Classification of Secondary Metabolites in Nine Bryophyte Species
Source: MDPI journal article supplement (doi:10.3390/metabo9100222), 2019-10-11

**(a)**

### Fatty acids and conjugates

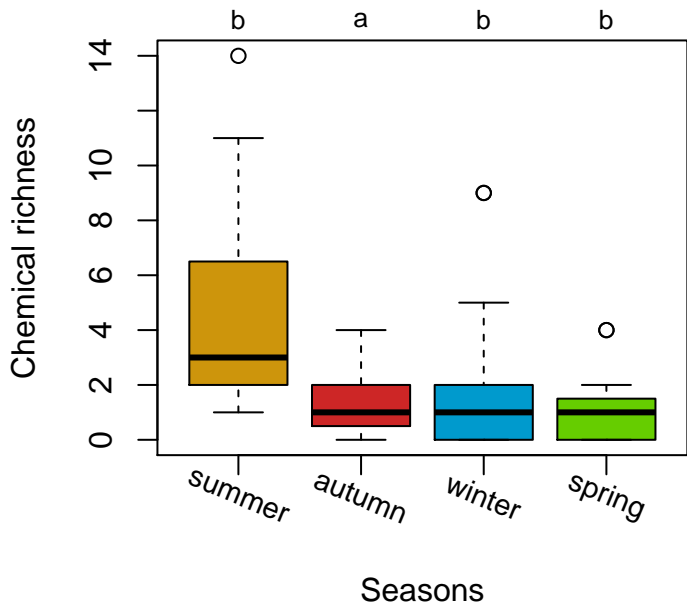

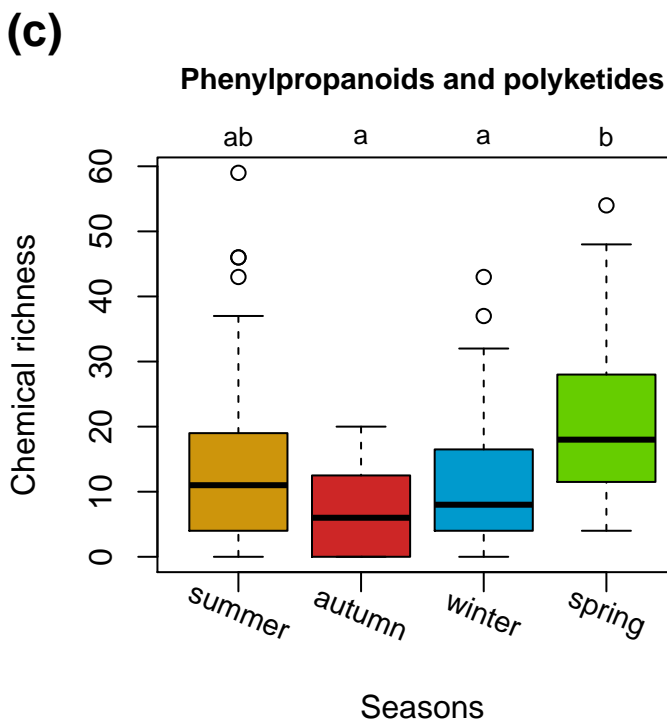

**(d)**

## Flavonoids

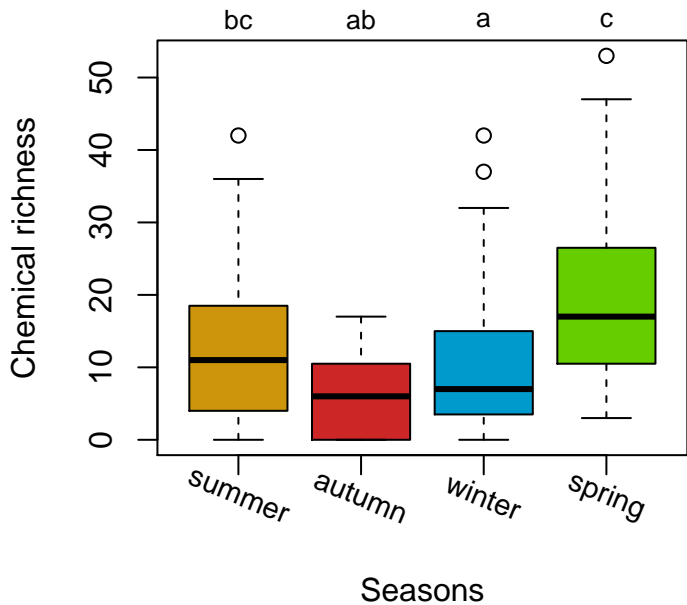

**(e)**

# Anthocyanins

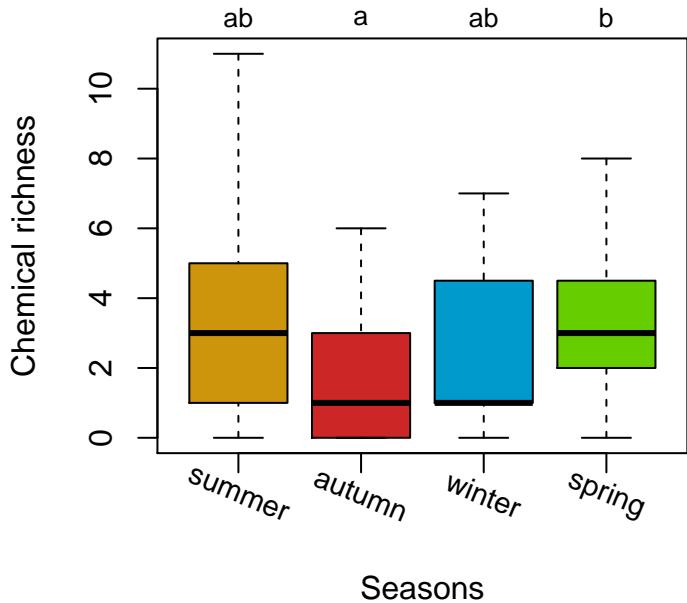

**(b)**

## Carbohydrates and carbohydrate conjugates

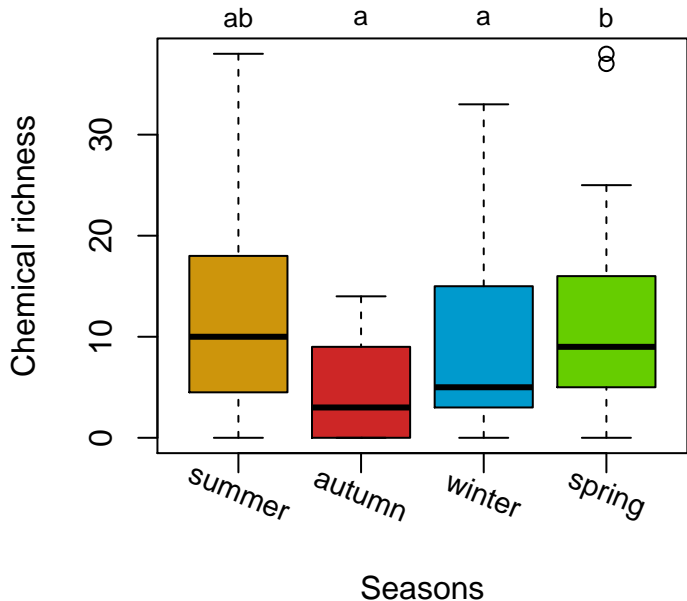

Supplement: s1 [file s1]
