# Supplementary material for: Chemical Diversity and Classification of Secondary Metabolites in Nine Bryophyte Species
Source: MDPI journal article supplement (doi:10.3390/metabo9100222), 2019-10-11

**(a)**

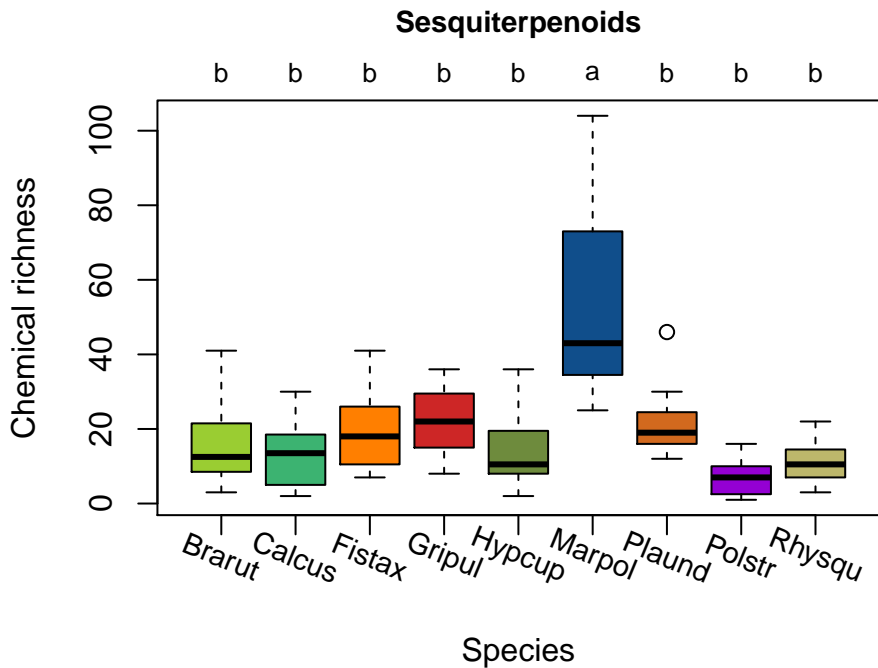

(e)

Lignans, neolignans and related compounds

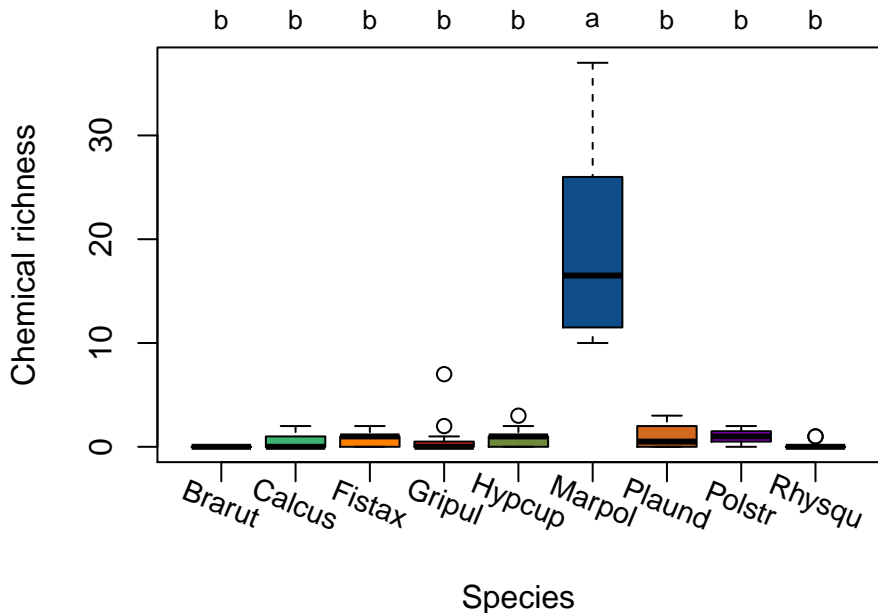

(f)

# Stilbenes

Chemical richness

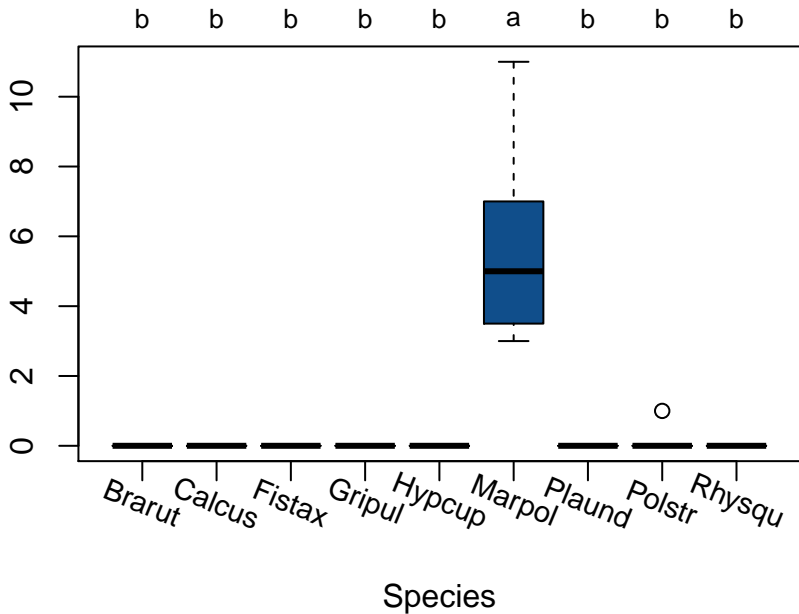

**(b)**

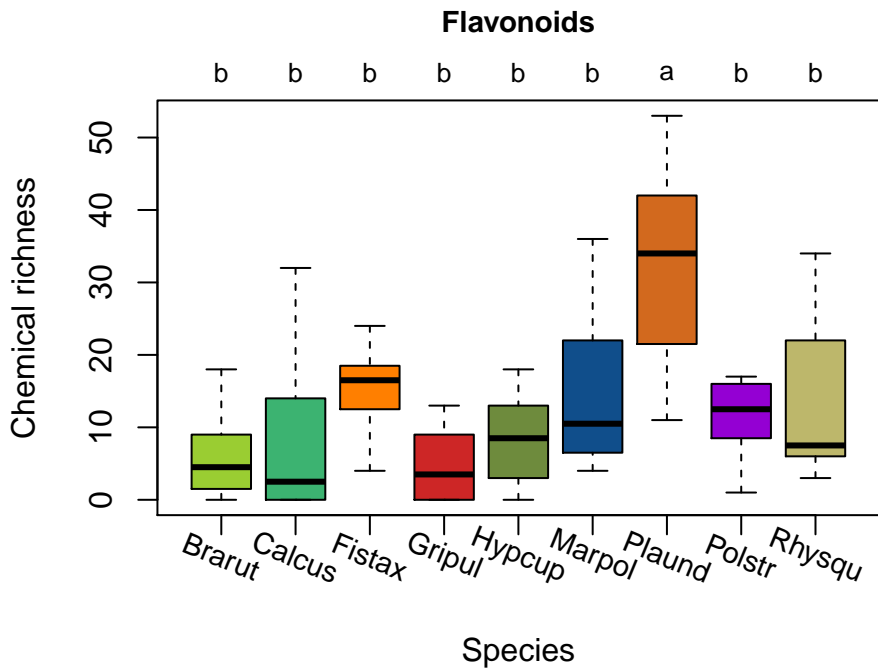

(d)

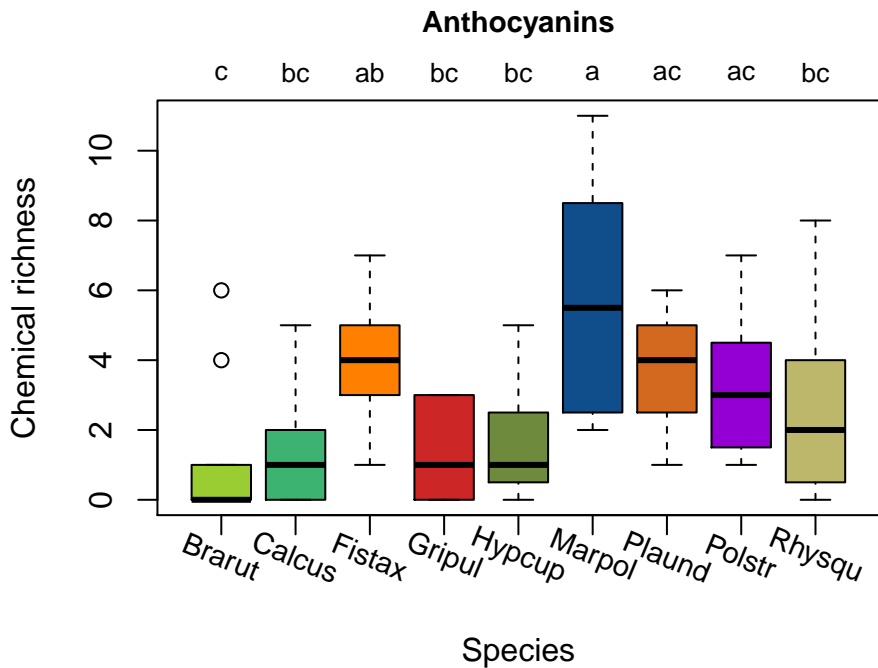

(c)

### Glycosyl compounds

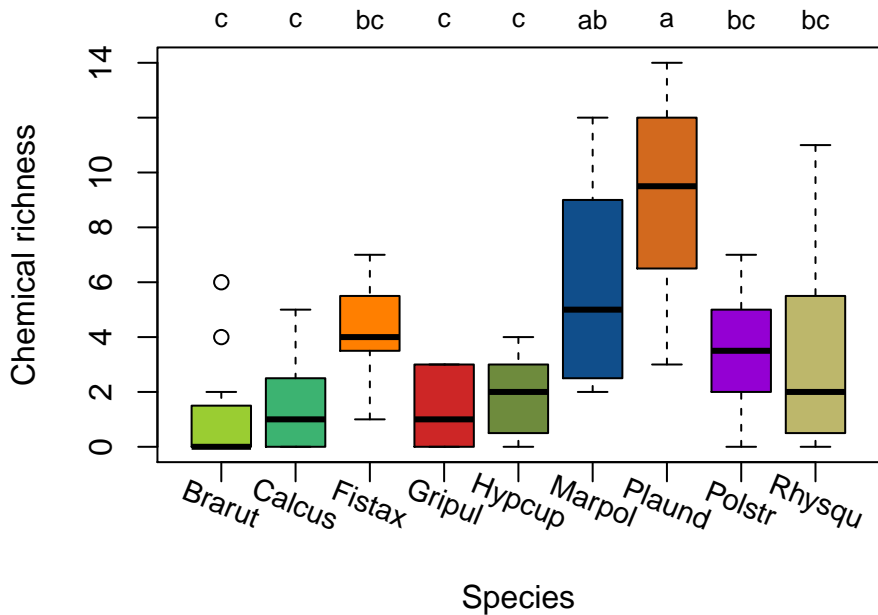

Supplement: s1 [file s1]
