# Supplementary material for: Chemical Diversity and Classification of Secondary Metabolites in Nine Bryophyte Species
Source: Metabolites. 2019 Oct 11;9(10):222. doi: 10.3390/metabo9100222 (PMC6835487; doi:10.3390/metabo9100222)
Supplement: Supplementary file 1 [file metabolites-09-00222-s001.zip]

Archive with 36 entries (36 files):
- fig_1.csv
- fig_1.pdf
- fig_2.csv
- fig_2.pdf
- fig_3.csv
- fig_3.pdf
- fig_4.csv
- fig_4.pdf
- fig_5.csv
- fig_5.pdf
- fig_6.csv
- fig_6.pdf
- fig_s1.csv
- fig_s1a.pdf
- fig_s1b.pdf
- fig_s1c.pdf
- fig_s1d.pdf
- fig_s2.csv
- fig_s2a.pdf
- fig_s2b.pdf
- fig_s2c.pdf
- fig_s2d.pdf
- fig_s3a.csv
- fig_s3a.pdf
- fig_s3b.csv
- fig_s3b.pdf
- fig_s4.csv
- fig_s4.pdf
- fig_s5.csv
- fig_s5.pdf
- fig_s6.csv
- fig_s6.pdf
- supporting-information.docx
- table_1.csv
- table_s1.csv
- table_s2.csv
