# Supplementary material for: Chemical Diversity and Classification of Secondary Metabolites in Nine Bryophyte Species
Source: Metabolites. 2019 Oct 11;9(10):222. doi: 10.3390/metabo9100222 (PMC6835487; doi:10.3390/metabo9100222)
Supplement: Supplementary file 1 [file metabolites-09-00222-s001.zip › fig_1.csv]

Classifier.classes	Number.of.spectra
Organic compounds; Lipids and lipid-like molecules	6757
Organic compounds; Lipids and lipid-like molecules; Fatty Acyls; Fatty acids and conjugates	238
Organic compounds; Lipids and lipid-like molecules; Steroids and steroid derivatives	650
Organic compounds; Lipids and lipid-like molecules; Prenol lipids	4504
Organic compounds; Lipids and lipid-like molecules; Prenol lipids; Sesquiterpenoids	2139
Organic compounds; Lignans, neolignans and related compounds	290
Organic compounds; Organoheterocyclic compounds; Lactones	197
Organic compounds; Phenylpropanoids and polyketides	1547
Organic compounds; Phenylpropanoids and polyketides; Cinnamic acids and derivatives; Cinnamic acids	36
Organic compounds; Phenylpropanoids and polyketides; Stilbenes	67
Organic compounds; Benzenoids; Phenols; Methoxyphenols	58
Organic compounds; Phenylpropanoids and polyketides; Flavonoids	1363
Organic compounds; Phenylpropanoids and polyketides; Flavonoids; Flavones	207
Organic compounds; Phenylpropanoids and polyketides; Flavonoids; Flavans	107
Organic compounds; Phenylpropanoids and polyketides; Flavonoids; Flavonoid glycosides	767
Organic compounds; Phenylpropanoids and polyketides; Flavonoids; Flavonoid glycosides; Flavonoid O-glycosides; Anthocyanins	297
Organic compounds; Organic oxygen compounds; Organooxygen compounds; Carbohydrates and carbohydrate conjugates	1061
Organic compounds; Organic oxygen compounds; Organooxygen compounds; Carbohydrates and carbohydrate conjugates; Monosaccharides	230
Organic compounds; Organic oxygen compounds; Organooxygen compounds; Carbohydrates and carbohydrate conjugates; Disaccharides	126
Organic compounds; Organic oxygen compounds; Organooxygen compounds; Carbohydrates and carbohydrate conjugates; Glycosyl compounds	387
Organic compounds; Alkaloids and derivatives	5
Organic compounds; Organic acids and derivatives; Carboxylic acids and derivatives; Amino acids, peptides, and analogues; Amino acids and derivatives; Amino acids	115
Organic compounds; Organic acids and derivatives; Carboxylic acids and derivatives; Amino acids, peptides, and analogues; Peptides	2
Organic compounds; Nucleosides, nucleotides, and analogues	203
