# Supplementary material for: Chemical Diversity and Classification of Secondary Metabolites in Nine Bryophyte Species
Source: Metabolites. 2019 Oct 11;9(10):222. doi: 10.3390/metabo9100222 (PMC6835487; doi:10.3390/metabo9100222)
Supplement: Supplementary file 1 [file metabolites-09-00222-s001.zip › fig_2.csv]

	Lipids and lipid-like molecules	Fatty acids and conjugates	Steroids and steroid derivatives	Prenol lipids	Sesquiterpenoids	Lignans, neolignans and related compounds	Lactones	Phenylpropanoids and polyketides	Cinnamic acids	Stilbenes	Methoxyphenols	Flavonoids	Flavones	Flavans	Flavonoid glycosides	Anthocyanins	Carbohydrates and carbohydrate conjugates	Monosaccharides	Disaccharides	Glycosyl compounds	Alkaloids and derivatives	Amino acids	Peptides	Nucleosides, nucleotides, and analogues
Brarut	6.45833828334479	3.25809653802148	4.45434729625351	5.95064255258773	5.22035582507832	0	3.29583686600433	4.39444915467244	2.19722457733622	0	0.693147180559945	4.27666611901606	1.94591014905531	1.09861228866811	3.91202300542815	2.56494935746154	3.73766961828337	2.19722457733622	1.6094379124341	2.63905732961526	0	2.19722457733622	0	2.39789527279837
Calcus	6.22851100359118	2.63905732961526	3.97029191355212	5.83188247728352	5.07517381523383	1.79175946922805	2.99573227355399	4.60517018598809	0	0	1.38629436111989	4.55387689160054	2.19722457733622	2.63905732961526	3.93182563272433	2.77258872223978	3.95124371858143	2.30258509299405	2.30258509299405	2.89037175789616	0	2.56494935746154	0	2.484906649788
Fistax	6.71174039505618	3.55534806148941	4.62497281328427	6.23048144757848	5.47227067367148	2.07944154167984	3.55534806148941	5.25227342804663	0	0	1.09861228866811	5.22035582507832	3.55534806148941	2.484906649788	4.59511985013459	3.87120101090789	5.11198778835654	3.89182029811063	2.63905732961526	3.97029191355212	0	2.70805020110221	0	3.66356164612965
Gripul	6.77650699237218	2.94443897916644	4.34380542185368	6.35610766069589	5.59471137960184	2.30258509299405	2.484906649788	4.00733318523247	0	0	0	3.98898404656427	1.94591014905531	0	3.55534806148941	2.83321334405622	3.66356164612965	1.09861228866811	1.6094379124341	2.77258872223978	0	2.39789527279837	0	2.99573227355399
Hypcup	6.37672694789863	3.13549421592915	4.34380542185368	5.8636311755981	5.11198778835654	2.39789527279837	3.25809653802148	4.59511985013459	0	0	0	4.57471097850338	2.63905732961526	0.693147180559945	4.00733318523247	2.89037175789616	4.06044301054642	2.56494935746154	0	3.13549421592915	0	2.89037175789616	0	2.30258509299405
Marpol	7.4759059693674	3.80666248977032	4.65396035015752	7.18538701558042	6.46925031679577	5.42934562895444	3.43398720448515	5.69035945432406	2.99573227355399	4.18965474202643	3.09104245335832	5.15905529921453	2.19722457733622	2.94443897916644	4.91998092582813	4.23410650459726	5.10594547390058	2.484906649788	3.52636052461616	4.27666611901606	0.693147180559945	2.63905732961526	0	3.61091791264422
Plaund	6.71780469502369	3.3322045101752	4.4188406077966	6.32076829425058	5.56068163101553	2.56494935746154	3.36729582998647	5.97126183979046	0.693147180559945	0	0	5.95324333428778	4.45434729625351	2.94443897916644	5.17614973257383	3.78418963391826	5.77765232322266	4.4188406077966	3.52636052461616	4.70048036579242	0.693147180559945	1.94591014905531	0	3.17805383034795
Polstr	5.66988092298052	3.25809653802148	2.94443897916644	5.25227342804663	4.45434729625351	2.484906649788	1.6094379124341	5.07517381523383	0.693147180559945	0	2.83321334405622	4.93447393313069	2.99573227355399	2.70805020110221	4.38202663467388	3.71357206670431	4.84418708645859	3.49650756146648	2.70805020110221	3.73766961828337	0	2.484906649788	0	3.52636052461616
Rhysqu	6.09356977004514	3.09104245335832	3.87120101090789	5.62040086571715	4.86753445045558	0.693147180559945	2.484906649788	5.15329159449778	0.693147180559945	0	2.07944154167984	5.08759633523238	2.99573227355399	3.13549421592915	4.4188406077966	3.43398720448515	4.48863636973214	2.89037175789616	2.07944154167984	3.66356164612965	0	2.77258872223978	0	2.77258872223978
