# Supplementary material for: Chemical Diversity and Classification of Secondary Metabolites in Nine Bryophyte Species
Source: Metabolites. 2019 Oct 11;9(10):222. doi: 10.3390/metabo9100222 (PMC6835487; doi:10.3390/metabo9100222)
Supplement: Supplementary file 1 [file metabolites-09-00222-s001.zip › fig_3.csv]

species	Sesquiterpenoids	Flavonoids	Glycosyl compounds	Anthocyanins	Lignans, neolignans and related compounds	Stilbenes
Fistax	7	4	1	1	1	0
Fistax	12	18	4	4	1	0
Fistax	10	19	5	5	1	0
Fistax	22	15	6	6	1	0
Fistax	26	9	3	2	0	0
Fistax	37	16	4	3	2	0
Fistax	10	18	5	5	1	0
Fistax	11	13	3	3	0	0
Fistax	26	17	4	4	0	0
Fistax	41	20	7	4	1	0
Fistax	14	12	4	4	0	0
Fistax	22	24	7	7	0	0
Hypcup	10	0	0	0	1	0
Gripul	10	10	3	3	2	0
Polstr	16	12	4	4	1	0
Hypcup	11	3	1	1	0	0
Gripul	30	0	0	0	0	0
Brarut	20	5	0	0	0	0
Polstr	9	16	6	7	0	0
Brarut	14	4	0	0	0	0
Brarut	9	11	4	4	0	0
Polstr	15	17	3	3	2	0
Polstr	7	1	0	1	0	0
Polstr	3	16	7	7	1	0
Polstr	1	13	4	4	2	0
Polstr	9	16	4	3	2	0
Hypcup	10	13	4	3	2	0
Polstr	5	14	6	5	1	0
Polstr	2	10	3	3	1	0
Polstr	11	7	1	1	0	0
Gripul	8	8	3	3	7	0
Polstr	1	7	1	1	1	0
Polstr	7	10	3	2	1	1
Hypcup	11	11	3	1	0	0
Plaund	12	36	9	4	0	0
Gripul	34	3	1	1	0	0
Hypcup	5	4	2	2	0	0
Brarut	17	18	2	1	0	0
Plaund	14	29	9	5	0	0
Hypcup	2	7	2	1	1	0
Gripul	27	0	0	0	0	0
Brarut	11	3	0	0	0	0
Plaund	18	42	12	6	1	0
Plaund	46	32	12	3	2	0
Brarut	8	0	0	0	0	0
Plaund	16	53	14	5	3	0
Rhysqu	10	3	0	0	0	0
Plaund	22	37	10	5	3	0
Plaund	26	11	3	1	0	0
Plaund	17	47	13	5	2	0
Rhysqu	9	8	2	2	0	0
Plaund	30	42	11	4	2	0
Plaund	16	13	4	1	0	0
Plaund	23	27	8	2	0	0
Calcus	17	0	0	0	0	0
Rhysqu	12	6	2	2	0	0
Plaund	20	16	5	3	0	0
Calcus	18	32	5	4	2	0
Calcus	22	4	2	2	0	0
Rhysqu	14	12	3	2	0	0
Calcus	3	0	0	0	0	0
Rhysqu	8	32	8	7	0	0
Rhysqu	22	11	3	2	1	0
Rhysqu	16	7	1	1	0	0
Calcus	4	0	0	0	0	0
Calcus	19	26	5	5	2	0
Calcus	12	5	1	1	1	0
Calcus	13	2	1	1	0	0
Rhysqu	3	6	0	0	0	0
Rhysqu	11	34	11	8	1	0
Brarut	9	2	0	0	0	0
Calcus	14	0	0	0	0	0
Rhysqu	6	6	1	1	0	0
Rhysqu	15	34	8	6	0	0
Brarut	6	1	0	0	0	0
Calcus	6	3	1	1	0	0
Calcus	2	0	0	0	0	0
Calcus	30	23	3	2	1	0
Hypcup	36	3	0	0	1	0
Brarut	24	7	1	1	0	0
Rhysqu	4	3	0	0	0	0
Hypcup	26	18	3	3	1	0
Hypcup	10	10	3	5	1	0
Hypcup	17	15	3	1	1	0
Hypcup	6	0	0	0	0	0
Hypcup	22	13	2	1	3	0
Gripul	21	4	1	1	0	0
Brarut	23	7	1	1	0	0
Gripul	23	0	0	0	0	0
Gripul	11	10	3	3	0	0
Gripul	21	6	2	3	1	0
Gripul	36	0	0	0	0	0
Brarut	3	0	0	0	0	0
Gripul	19	13	3	3	0	0
Brarut	41	14	6	6	0	0
Gripul	29	0	0	0	0	0
Marpol	28	6	2	3	10	3
Marpol	35	12	6	6	10	3
Marpol	98	29	12	11	29	8
Marpol	53	10	5	5	23	6
Marpol	25	11	5	6	15	6
Marpol	38	7	3	2	11	3
Marpol	104	36	11	10	37	11
Marpol	51	16	7	7	19	7
Marpol	34	10	5	5	13	4
Marpol	38	4	2	2	12	4
Marpol	93	28	12	10	31	7
Marpol	48	5	2	2	18	4
