# Supplementary material for: Chemical Diversity and Classification of Secondary Metabolites in Nine Bryophyte Species
Source: Metabolites. 2019 Oct 11;9(10):222. doi: 10.3390/metabo9100222 (PMC6835487; doi:10.3390/metabo9100222)
Supplement: Supplementary file 1 [file metabolites-09-00222-s001.zip › fig_4.csv]

	Lipids and lipid-like molecules	Fatty acids and conjugates	Steroids and steroid derivatives	Prenol lipids	Sesquiterpenoids	Lignans, neolignans and related compounds	Lactones	Phenylpropanoids and polyketides	Cinnamic acids	Stilbenes	Methoxyphenols	Flavonoids	Flavones	Flavans	Flavonoid glycosides	Anthocyanins	Carbohydrates and carbohydrate conjugates	Monosaccharides	Disaccharides	Glycosyl compounds	Alkaloids and derivatives	Amino acids	Peptides	Nucleosides, nucleotides, and analogues
summer	7.64300363556072	4.85203026391962	5.25749537202778	7.23128700432762	6.49072353450251	4.74493212836325	3.85014760171006	6.07993319509559	2.89037175789616	3.25809653802148	2.89037175789616	5.91350300563827	3.78418963391826	3.40119738166216	5.44673737166631	4.60517018598809	5.85220247977447	4.40671924726425	3.89182029811063	4.75359019110636	0	3.87120101090789	0	4.18965474202643
autumn	7.04577657687951	3.63758615972639	4.65396035015752	6.63463335786169	5.88887795833288	3.78418963391826	3.25809653802148	5.25227342804663	1.09861228866811	2.63905732961526	2.30258509299405	5.07517381523383	3.13549421592915	2.39789527279837	4.57471097850338	3.73766961828337	4.91998092582813	3.36729582998647	2.70805020110221	3.89182029811063	0	3.3322045101752	0	3.76120011569356
winter	7.52617891334615	3.78418963391826	5.29330482472449	7.10824413973154	6.361302477573	4.29045944114839	4.20469261939097	5.85507192220243	1.6094379124341	2.83321334405622	2.39789527279837	5.7268477475872	3.87120101090789	2.99573227355399	5.17048399503815	4.21950770517611	5.52545293913178	3.97029191355212	3.3322045101752	4.54329478227	1.09861228866811	3.09104245335832	0	3.66356164612965
spring	7.41878088275079	3.3322045101752	5.03695260241363	7.03790596344718	6.29156913955832	4.06044301054642	4.04305126783455	6.3456363608286	2.30258509299405	2.30258509299405	2.94443897916644	6.26530121273771	4.52178857704904	3.8286413964891	5.5683445037611	4.46590811865458	5.78382518232974	4.18965474202643	3.52636052461616	4.85203026391962	0	2.83321334405622	0	4.00733318523247
