# Supplementary material for: Chemical Diversity and Classification of Secondary Metabolites in Nine Bryophyte Species
Source: Metabolites. 2019 Oct 11;9(10):222. doi: 10.3390/metabo9100222 (PMC6835487; doi:10.3390/metabo9100222)
Supplement: Supplementary file 1 [file metabolites-09-00222-s001.zip › fig_5.csv]

seasons	Fatty acids and conjugates	Carbohydrates and carbohydrate conjugates	Phenylpropanoids and polyketides	Flavonoids	Anthocyanins
autumn	0	3	4	4	1
spring	4	15	20	18	4
summer	1	17	20	19	5
winter	9	17	15	15	6
autumn	3	12	10	9	2
spring	1	11	16	16	3
summer	2	16	18	18	5
winter	0	10	13	13	3
autumn	1	13	18	17	4
spring	0	17	20	20	4
summer	5	13	12	12	4
winter	9	22	25	24	7
autumn	1	0	0	0	0
spring	1	6	10	10	3
summer	7	12	13	12	4
winter	1	2	3	3	1
autumn	2	1	0	0	0
spring	1	0	7	5	0
summer	6	18	16	16	7
winter	2	0	5	4	0
autumn	4	12	12	11	4
spring	1	9	20	17	3
summer	6	0	1	1	1
winter	0	20	17	16	7
autumn	1	12	15	13	4
spring	1	16	20	16	3
summer	9	12	14	13	3
winter	0	16	16	14	5
autumn	1	7	12	10	3
spring	1	6	8	7	1
summer	3	8	8	8	3
winter	1	3	8	7	1
autumn	1	8	14	10	2
spring	2	8	11	11	1
summer	2	28	37	36	4
winter	5	2	3	3	1
autumn	0	6	4	4	2
spring	0	4	18	18	1
summer	5	28	30	29	5
winter	1	4	7	7	1
autumn	2	0	0	0	0
spring	1	0	4	3	0
summer	2	38	43	42	6
winter	4	33	32	32	3
autumn	3	0	0	0	0
spring	2	38	54	53	5
summer	5	0	3	3	0
winter	1	28	37	37	5
autumn	4	8	11	11	1
spring	0	37	48	47	5
summer	4	6	8	8	2
winter	2	32	43	42	4
autumn	2	14	13	13	1
spring	2	25	28	27	2
summer	2	2	0	0	0
winter	0	5	7	6	2
autumn	2	14	16	16	3
spring	0	12	34	32	4
summer	2	7	4	4	2
winter	0	7	13	12	2
autumn	0	0	0	0	0
spring	2	16	35	32	7
summer	7	6	11	11	2
winter	1	4	8	7	1
autumn	2	0	0	0	0
spring	0	12	28	26	5
summer	1	5	6	5	1
winter	1	3	2	2	1
autumn	0	0	6	6	0
spring	1	25	36	34	8
summer	1	0	3	2	0
winter	1	0	0	0	0
autumn	1	3	6	6	1
spring	0	17	37	34	6
summer	2	1	1	1	0
winter	2	4	3	3	1
autumn	2	0	0	0	0
spring	1	7	23	23	2
summer	2	0	3	3	0
winter	0	3	8	7	1
autumn	1	0	3	3	0
spring	0	5	18	18	3
summer	3	10	10	10	5
winter	0	6	16	15	1
autumn	0	0	0	0	0
spring	4	5	13	13	1
summer	2	5	4	4	1
winter	0	3	8	7	1
autumn	0	0	0	0	0
spring	0	5	10	10	3
summer	3	4	6	6	3
winter	0	0	0	0	0
autumn	2	1	0	0	0
spring	1	8	14	13	3
summer	10	18	15	14	6
winter	0	0	0	0	0
autumn	2	5	11	6	3
spring	0	13	18	12	6
summer	11	36	46	29	11
winter	1	8	24	10	5
autumn	0	10	20	11	6
spring	2	4	12	7	2
summer	14	29	59	36	10
winter	1	14	26	16	7
autumn	1	8	16	10	5
spring	0	4	8	4	2
summer	11	29	46	28	10
winter	2	5	10	5	2
