# Supplementary material for: Chemical Diversity and Classification of Secondary Metabolites in Nine Bryophyte Species
Source: Metabolites. 2019 Oct 11;9(10):222. doi: 10.3390/metabo9100222 (PMC6835487; doi:10.3390/metabo9100222)
Supplement: Supplementary file 1 [file metabolites-09-00222-s001.zip › fig_6.csv]

species	summer	autumn	winter	spring	compound_class
Brarut	0	1	2	2	Lactones
Brarut	0	1	4	0	Lactones
Brarut	11	0	6	0	Lactones
Fistax	5	1	6	4	Anthocyanins
Fistax	5	2	3	3	Anthocyanins
Fistax	4	4	7	4	Anthocyanins
Gripul	8	30	34	10	Sesquiterpenoids
Gripul	21	27	36	11	Sesquiterpenoids
Gripul	21	23	29	19	Sesquiterpenoids
Marpol	29	10	23	10	Lignans, neolignans and related compounds
Marpol	37	15	19	11	Lignans, neolignans and related compounds
Marpol	31	13	18	12	Lignans, neolignans and related compounds
Marpol	8	3	6	3	Stilbenes
Marpol	11	6	7	3	Stilbenes
Marpol	7	4	4	4	Stilbenes
Marpol	3	1	2	0	Methoxyphenols
Marpol	4	2	1	2	Methoxyphenols
Marpol	5	1	1	0	Methoxyphenols
Marpol	11	3	5	6	Anthocyanins
Marpol	10	6	7	2	Anthocyanins
Marpol	10	5	2	2	Anthocyanins
Marpol	8	1	3	1	Lactones
Marpol	6	1	1	1	Lactones
Marpol	5	1	2	1	Lactones
Plaund	0	5	9	1	Lactones
Plaund	0	2	3	2	Lactones
Plaund	1	2	2	2	Lactones
Polstr	12	12	20	9	Carbohydrates and carbohydrate conjugates
Polstr	18	7	16	16	Carbohydrates and carbohydrate conjugates
Polstr	0	8	3	6	Carbohydrates and carbohydrate conjugates
