# Supplementary material for: Chemical Diversity and Classification of Secondary Metabolites in Nine Bryophyte Species
Source: Metabolites. 2019 Oct 11;9(10):222. doi: 10.3390/metabo9100222 (PMC6835487; doi:10.3390/metabo9100222)
Supplement: Supplementary file 1 [file metabolites-09-00222-s001.zip › fig_s1.csv]

species	unique	shannon	pielou	concentration
Fistax	51	6.56807791141198	0.940790577434668	108471596
Fistax	59	6.58479139238572	0.9391135741211	110598194
Fistax	111	6.77764659363512	0.940776560238138	117983350
Fistax	98	6.80239476332431	0.943536686352801	113946634
Fistax	71	6.71417052990947	0.939855488667951	113810661
Fistax	107	6.91968384984741	0.948240092429913	127283242
Fistax	125	6.78671695060508	0.944668076463781	121505613
Fistax	97	6.75576892198425	0.943193339262211	110422557
Fistax	73	6.73101810048208	0.946217205130815	114538293
Fistax	78	6.84268328223842	0.944698388452562	129114670
Fistax	74	6.77764659363512	0.949830980413378	123399448
Fistax	93	6.76041469108343	0.944111793634122	108180505
Hypcup	31	6.45990445437754	0.949505204518555	105776329
Gripul	75	6.81673588059497	0.94682189204763	130797027
Polstr	133	6.64898455002478	0.945281916705133	124923595
Hypcup	63	6.62007320653036	0.937719059845661	115094174
Gripul	112	6.63725803128446	0.93439369763374	110942385
Brarut	96	6.88550967003482	0.947721959686015	137767314
Polstr	148	6.65027904858742	0.940016483332975	118926610
Brarut	54	6.72022015513529	0.94807398649747	119033318
Brarut	18	6.36647044773144	0.944678065811654	102995197
Polstr	192	6.73340189183736	0.942275948475466	124225907
Polstr	154	6.67203294546107	0.940643282186572	118776545
Polstr	146	6.61606518513282	0.941778440038763	112516934
Polstr	131	6.36990098282823	0.938613950331751	104184598
Polstr	200	6.80350525760834	0.935817780105618	118704413
Hypcup	85	6.7945865808765	0.943222854685538	129840540
Polstr	153	6.63200177739563	0.944859037234643	114968415
Polstr	148	6.50876913697168	0.93766327595986	103826876
Polstr	198	6.75343791859778	0.939914277634373	119259496
Gripul	74	6.68461172766793	0.931835266373411	113673409
Polstr	148	6.52502965784346	0.937170207299677	105981475
Polstr	135	6.45047042214418	0.939460859106532	112947524
Hypcup	110	6.82762923450285	0.942257656093066	134491533
Plaund	141	6.76041469108343	0.939623010533591	132171401
Gripul	113	6.81783057145415	0.940747565117035	120005806
Hypcup	23	6.24027584517077	0.945410896542025	97396537
Brarut	94	6.84587987526405	0.941078977476629	148054216
Plaund	145	6.76041469108343	0.942786859990632	126594958
Hypcup	58	6.37842618365159	0.926942612414568	98588425
Gripul	100	6.53813982376767	0.934575146090817	105197439
Brarut	89	6.86066367144829	0.943624337220826	134858546
Plaund	166	6.80682936039218	0.94154430209901	131606402
Plaund	177	6.84481547920826	0.949849019596013	135963931
Brarut	25	6.41345895716736	0.93953589083676	101672116
Plaund	160	6.92657703322272	0.941215133150642	134158743
Rhysqu	20	6.68586094706836	0.947572028834498	118272440
Plaund	202	6.86066367144829	0.95379925739492	146483974
Plaund	225	6.78784498230958	0.941730752477225	212598330
Plaund	164	6.87832646829132	0.941614913532425	127298015
Rhysqu	17	6.66440902035041	0.9428628219746	118543957
Plaund	157	6.85856503479136	0.953827522056924	142306505
Plaund	211	6.7322107064672	0.942739063026876	183859506
Plaund	167	6.83410873881384	0.941229527344085	128591673
Calcus	19	6.65286302935335	0.944722491824961	122596727
Rhysqu	31	6.46925031679577	0.948627333861018	114265732
Plaund	217	6.7719355558396	0.946065585267223	156632013
Calcus	83	6.88959130835447	0.947807628660646	136950724
Calcus	24	6.67076632084587	0.948447958494853	122024968
Rhysqu	29	6.57228254269401	0.941876427421974	114162334
Calcus	10	6.05678401322862	0.919161023635288	101670508
Rhysqu	73	6.86589107488344	0.948467625822467	136956748
Rhysqu	24	6.6631326959908	0.945225618559131	131025821
Rhysqu	34	6.66185474054531	0.949048761686256	115404990
Calcus	11	6.11809719804135	0.929304557721397	105636793
Calcus	69	6.85856503479136	0.949902246157161	139790718
Calcus	1	6.53233429222235	0.938296339796199	115234470
Calcus	15	6.4377516497364	0.940268141825076	109100916
Rhysqu	13	6.10924758276437	0.909358072511383	103052179
Rhysqu	70	6.88243747099785	0.952184504073289	139796818
Brarut	71	6.70441435496411	0.934382417245221	124861819
Calcus	9	6.53087762772588	0.931972912759202	111898242
Rhysqu	16	6.24027584517077	0.935166035815153	103215451
Rhysqu	78	6.89162589705225	0.946792804847516	143821369
Brarut	73	6.72142570079064	0.936548284800042	119420383
Calcus	15	6.48004456192665	0.937416978942933	106954335
Calcus	13	6.08677472691231	0.926931365828037	95635842
Calcus	92	6.86484777797086	0.940216964721842	138828649
Hypcup	47	6.69332366826995	0.940770538285646	131705618
Brarut	62	6.69826805411541	0.93968658727609	114641319
Rhysqu	12	6.15909538849193	0.940669002058446	94998602
Hypcup	118	6.94408720822953	0.949574487472256	142565953
Hypcup	73	6.79346613258001	0.941591006087087	129371499
Hypcup	54	6.65801104587075	0.943442892929464	110162392
Hypcup	23	6.37331978957701	0.938405946850881	98771125
Hypcup	83	6.95081476844258	0.955878740746247	148298174
Gripul	86	6.80461452006262	0.941251390658173	121018950
Brarut	74	6.84268328223842	0.943694394720592	122882621
Gripul	115	6.63594655568665	0.933347902605356	110146632
Gripul	60	6.85646198459459	0.950902742593508	125769967
Gripul	66	6.70563909486	0.943655396714656	121362606
Gripul	118	6.77878489768518	0.939940183844291	118230002
Brarut	26	6.3491389913798	0.944245654585187	99268845
Gripul	75	6.90475076996184	0.951163026975046	131230416
Brarut	70	6.82001636467413	0.943781096402418	132336859
Gripul	75	6.70441435496411	0.942508697298763	109884889
Marpol	221	6.69579891705849	0.937624341130785	146037801
Marpol	344	6.84800527457636	0.938273387877464	141340031
Marpol	629	7.27517231945277	0.971290928716048	243806528
Marpol	353	7.03614849375054	0.949586108839154	169974846
Marpol	218	6.67329796776765	0.941694778536809	147687439
Marpol	302	6.83410873881384	0.938781128454307	151270528
Marpol	636	7.28550654852279	0.969565814552104	255178991
Marpol	378	6.99942246750796	0.951409215977183	174936463
Marpol	197	6.67203294546107	0.942627390625737	141433222
Marpol	333	6.82546003625531	0.941927238603317	143054308
Marpol	610	7.20563517641036	0.970564019251875	238543958
Marpol	367	6.96885037834195	0.9485318993552	165734055
