# Supplementary material for: Chemical Diversity and Classification of Secondary Metabolites in Nine Bryophyte Species
Source: Metabolites. 2019 Oct 11;9(10):222. doi: 10.3390/metabo9100222 (PMC6835487; doi:10.3390/metabo9100222)
Supplement: Supplementary file 1 [file metabolites-09-00222-s001.zip › fig_s2.csv]

seasons	unique	shannon	pielou	concentration
autumn	51	6.56807791141198	0.940790577434668	108471596
spring	59	6.58479139238572	0.9391135741211	110598194
summer	111	6.77764659363512	0.940776560238138	117983350
winter	98	6.80239476332431	0.943536686352801	113946634
autumn	71	6.71417052990947	0.939855488667951	113810661
spring	107	6.91968384984741	0.948240092429913	127283242
summer	125	6.78671695060508	0.944668076463781	121505613
winter	97	6.75576892198425	0.943193339262211	110422557
autumn	73	6.73101810048208	0.946217205130815	114538293
spring	78	6.84268328223842	0.944698388452562	129114670
summer	74	6.77764659363512	0.949830980413378	123399448
winter	93	6.76041469108343	0.944111793634122	108180505
autumn	31	6.45990445437754	0.949505204518555	105776329
spring	75	6.81673588059497	0.94682189204763	130797027
summer	133	6.64898455002478	0.945281916705133	124923595
winter	63	6.62007320653036	0.937719059845661	115094174
autumn	112	6.63725803128446	0.93439369763374	110942385
spring	96	6.88550967003482	0.947721959686015	137767314
summer	148	6.65027904858742	0.940016483332975	118926610
winter	54	6.72022015513529	0.94807398649747	119033318
autumn	18	6.36647044773144	0.944678065811654	102995197
spring	192	6.73340189183736	0.942275948475466	124225907
summer	154	6.67203294546107	0.940643282186572	118776545
winter	146	6.61606518513282	0.941778440038763	112516934
autumn	131	6.36990098282823	0.938613950331751	104184598
spring	200	6.80350525760834	0.935817780105618	118704413
summer	85	6.7945865808765	0.943222854685538	129840540
winter	153	6.63200177739563	0.944859037234643	114968415
autumn	148	6.50876913697168	0.93766327595986	103826876
spring	198	6.75343791859778	0.939914277634373	119259496
summer	74	6.68461172766793	0.931835266373411	113673409
winter	148	6.52502965784346	0.937170207299677	105981475
autumn	135	6.45047042214418	0.939460859106532	112947524
spring	110	6.82762923450285	0.942257656093066	134491533
summer	141	6.76041469108343	0.939623010533591	132171401
winter	113	6.81783057145415	0.940747565117035	120005806
autumn	23	6.24027584517077	0.945410896542025	97396537
spring	94	6.84587987526405	0.941078977476629	148054216
summer	145	6.76041469108343	0.942786859990632	126594958
winter	58	6.37842618365159	0.926942612414568	98588425
autumn	100	6.53813982376767	0.934575146090817	105197439
spring	89	6.86066367144829	0.943624337220826	134858546
summer	166	6.80682936039218	0.94154430209901	131606402
winter	177	6.84481547920826	0.949849019596013	135963931
autumn	25	6.41345895716736	0.93953589083676	101672116
spring	160	6.92657703322272	0.941215133150642	134158743
summer	20	6.68586094706836	0.947572028834498	118272440
winter	202	6.86066367144829	0.95379925739492	146483974
autumn	225	6.78784498230958	0.941730752477225	212598330
spring	164	6.87832646829132	0.941614913532425	127298015
summer	17	6.66440902035041	0.9428628219746	118543957
winter	157	6.85856503479136	0.953827522056924	142306505
autumn	211	6.7322107064672	0.942739063026876	183859506
spring	167	6.83410873881384	0.941229527344085	128591673
summer	19	6.65286302935335	0.944722491824961	122596727
winter	31	6.46925031679577	0.948627333861018	114265732
autumn	217	6.7719355558396	0.946065585267223	156632013
spring	83	6.88959130835447	0.947807628660646	136950724
summer	24	6.67076632084587	0.948447958494853	122024968
winter	29	6.57228254269401	0.941876427421974	114162334
autumn	10	6.05678401322862	0.919161023635288	101670508
spring	73	6.86589107488344	0.948467625822467	136956748
summer	24	6.6631326959908	0.945225618559131	131025821
winter	34	6.66185474054531	0.949048761686256	115404990
autumn	11	6.11809719804135	0.929304557721397	105636793
spring	69	6.85856503479136	0.949902246157161	139790718
summer	1	6.53233429222235	0.938296339796199	115234470
winter	15	6.4377516497364	0.940268141825076	109100916
autumn	13	6.10924758276437	0.909358072511383	103052179
spring	70	6.88243747099785	0.952184504073289	139796818
summer	71	6.70441435496411	0.934382417245221	124861819
winter	9	6.53087762772588	0.931972912759202	111898242
autumn	16	6.24027584517077	0.935166035815153	103215451
spring	78	6.89162589705225	0.946792804847516	143821369
summer	73	6.72142570079064	0.936548284800042	119420383
winter	15	6.48004456192665	0.937416978942933	106954335
autumn	13	6.08677472691231	0.926931365828037	95635842
spring	92	6.86484777797086	0.940216964721842	138828649
summer	47	6.69332366826995	0.940770538285646	131705618
winter	62	6.69826805411541	0.93968658727609	114641319
autumn	12	6.15909538849193	0.940669002058446	94998602
spring	118	6.94408720822953	0.949574487472256	142565953
summer	73	6.79346613258001	0.941591006087087	129371499
winter	54	6.65801104587075	0.943442892929464	110162392
autumn	23	6.37331978957701	0.938405946850881	98771125
spring	83	6.95081476844258	0.955878740746247	148298174
summer	86	6.80461452006262	0.941251390658173	121018950
winter	74	6.84268328223842	0.943694394720592	122882621
autumn	115	6.63594655568665	0.933347902605356	110146632
spring	60	6.85646198459459	0.950902742593508	125769967
summer	66	6.70563909486	0.943655396714656	121362606
winter	118	6.77878489768518	0.939940183844291	118230002
autumn	26	6.3491389913798	0.944245654585187	99268845
spring	75	6.90475076996184	0.951163026975046	131230416
summer	70	6.82001636467413	0.943781096402418	132336859
winter	75	6.70441435496411	0.942508697298763	109884889
autumn	221	6.69579891705849	0.937624341130785	146037801
spring	344	6.84800527457636	0.938273387877464	141340031
summer	629	7.27517231945277	0.971290928716048	243806528
winter	353	7.03614849375054	0.949586108839154	169974846
autumn	218	6.67329796776765	0.941694778536809	147687439
spring	302	6.83410873881384	0.938781128454307	151270528
summer	636	7.28550654852279	0.969565814552104	255178991
winter	378	6.99942246750796	0.951409215977183	174936463
autumn	197	6.67203294546107	0.942627390625737	141433222
spring	333	6.82546003625531	0.941927238603317	143054308
summer	610	7.20563517641036	0.970564019251875	238543958
winter	367	6.96885037834195	0.9485318993552	165734055
