# Supplementary material for: Chemical Diversity and Classification of Secondary Metabolites in Nine Bryophyte Species
Source: Metabolites. 2019 Oct 11;9(10):222. doi: 10.3390/metabo9100222 (PMC6835487; doi:10.3390/metabo9100222)
Supplement: Supplementary file 1 [file metabolites-09-00222-s001.zip › fig_s3a.csv]

	pos_1	pos_2	pos_3	pos_4	pos_5	pos_6	pos_7	pos_8	pos_9	pos_10	pos_11	pos_12	pos_13	pos_14	pos_15	pos_16	pos_17	pos_18	pos_19	pos_20	pos_21	pos_22	pos_23	pos_24	pos_25	pos_26	pos_27	pos_28	pos_29	pos_30	pos_31	pos_32	pos_33	pos_34	pos_35	pos_36	pos_37	pos_38	pos_39	pos_40	pos_41	pos_42	pos_43	pos_44	pos_45	pos_46	pos_47	pos_48	pos_49
pos_01_autumn_Fistax_1_1.D.4_01_17205	0	0	0	0	0	8.22710054443429	6.17928459581443	0	0	7.13845938912142	0	8.37887771041126	6.88451891231769	8.06114330794473	0	0	0	0	0	0	7.34192851101835	0	0	9.01485288088848	7.56828749472246	0	0	0	8.23117596681863	0	0	7.64141884736936	5.68661160980466	0	0	9.53509880693647	8.01194861317351	7.63130896063783	0	7.49146042581001	0	0	0	0	8.25358729557388	0	7.31879306612535	7.37372742216175	0
pos_01_spring_Fistax_1_1.A.1_01_17275	0	0	0	0	0	9.19676090697478	0	0	0	8.02813451091257	0	7.75452235191005	5.77180059671947	7.9177710364187	0	6.65207884106477	0	0	0	6.10435119394091	7.42687601894446	0	0	8.29284752034551	7.60976308797428	0	0	0	0	0	0	7.39500422985628	0	0	0	8.83027873292924	7.84822782706118	6.37130410757716	0	6.66676120805482	0	7.30280813191946	0	0	8.22708963716143	8.66399149805561	7.19924150645212	7.62109194504852	0
pos_01_summer_Fistax_1_1.A.1_01_17170	6.42537132884744	7.057616658614	0	0	0	8.12975030308957	6.97438343673613	0	0	7.44896709076698	0	7.4984795189221	7.34779368309523	8.48295331422351	0	7.14600891464126	0	0	0	6.94513240027268	7.51016648210459	0	0	8.72058095071508	8.13700277036266	0	0	0	0	0	0	0	0	0	0	9.01319182962281	8.45052110441629	7.57329993832388	0	7.089098190941	0	8.3239203511018	0	0	7.3659679278966	0	7.57396007472862	7.19946003641868	0
pos_01_winter_Fistax_1_2.B.1_01_17240	0	7.66192126248246	0	8.21648423637559	0	9.36138265021478	7.0929963660932	0	6.52695741728896	7.16307419142356	0	6.95963136003829	8.19348557408093	7.7007991578033	0	0	0	0	0	0	7.62268965075023	0	0	9.46244548134078	8.288637086809	0	0	0	8.29292692313462	7.10438166542232	0	7.77522343616164	0	0	0	9.78253288495117	8.41814109684329	6.90685123045339	0	7.57392185286994	0	0	0	0	6.29385541293136	6.58752687406117	7.18909513201092	7.27798843596233	0
pos_02_autumn_Fistax_2_1.D.5_01_17206	0	7.46545362980939	5.93820503526689	0	6.46997786602113	8.31226957779817	8.15718528235789	0	0	7.03622105048499	7.86040826751265	6.73024871149952	7.87336517793615	8.26020413308426	0	0	0	0	0	0	7.37322259302393	0	0	8.7184422868456	7.44855715080566	0	0	0	8.46417841613036	0	0	8.20791797174904	0	0	0	9.07434564644913	8.55843476126245	7.62801369700626	0	7.55764130848615	0	0	0	0	6.29988447116201	5.47956334511507	7.32288869798157	6.97087936277466	0
pos_02_spring_Fistax_2_1.A.2_01_17276	0	0	0	0	6.99921318197681	8.30645151472617	0	0	0	8.33334967859299	0	7.396025429847	7.94623532459549	7.54393822096655	0	0	0	0	0	0	7.0563401950708	0	0	8.66747514020198	6.71712472646438	0	0	0	8.49582345417778	8.7768387128996	0	8.42243137046648	0	0	0	9.76489227320742	8.67931348374877	7.05772632861933	0	6.86439787193126	0	0	0	0	7.96806767404885	7.9796225650699	7.38039031803029	7.90487928259506	0
pos_02_summer_Fistax_2_1.A.2_01_17171	0	0	0	7.20192344508998	0	8.12558207209331	7.24799042696388	0	0	7.56100293747873	7.8163129423234	7.60988333052183	7.75715977599426	8.15893011205778	0	7.32868617288897	0	0	0	7.36832172427927	7.36724137044952	0	0	9.35756378571258	7.85825727456625	0	0	0	7.61207802958209	0	0	0	0	0	0	9.48083909917277	8.16806681782901	7.81541303836699	0	7.52426786393012	0	8.19616762643804	0	0	7.50927050033119	0	7.62058626850514	7.66018080655318	0
pos_02_winter_Fistax_2_2.B.2_01_17241	0	7.26597782476711	6.0715766014894	7.53098792771072	0	8.90284558940816	6.52257201106041	0	0	7.27053666146713	7.26936736132472	7.42684677717848	8.34505942242884	7.74560505935282	0	5.54234061197249	0	0	0	6.06222327959687	7.20928552137714	0	0	9.02022857520503	7.86401106230569	0	0	0	7.46835572483994	0	0	7.31236802393202	0	0	0	9.32249181860308	8.51592139903104	7.40008775371093	0	7.35969378741961	0	6.93179029928285	0	0	7.63814703271437	6.7678556521289	7.11766054965554	7.02303877672806	0
pos_03_autumn_Fistax_3_1.D.6_01_17207	6.68965150662056	7.58448950082274	0	8.45853494751093	6.60885367519307	8.66834718774716	7.72580397736612	0	0	7.21456489797317	0	8.34602350641938	8.53177279065307	7.96062198931627	0	0	0	0	0	0	7.28555689307141	0	0	9.17685257882857	7.58141055010447	0	0	0	8.7069002828828	0	0	7.94098114428801	0	0	0	9.50544921367765	8.54379628368688	6.98019137879234	0	7.41013593571079	0	7.20909999105507	0	0	8.22628909169975	0	8.00488129305623	7.48203518693819	0
pos_03_spring_Fistax_3_1.A.3_01_17277	6.78821103706211	0	0	0	7.42559273289748	8.32134742770377	0	0	0	8.13054820604585	0	7.59224330430825	7.78778385445472	7.45666039502644	0	0	0	0	0	0	7.45314235618619	0	0	8.82954317530608	6.89417463598638	0	0	0	8.44183927416441	8.49080749036013	0	8.72653005580291	0	0	0	9.80699954771663	8.82732134416161	7.12078469655453	0	7.48735653464027	0	0	0	7.78375009793085	8.07338034671414	8.23807398828793	7.66923132114958	8.06140706537789	0
pos_03_summer_Fistax_3_1.A.3_01_17172	6.01170090385936	0	0	0	0	8.37482561732927	8.05077625451073	0	0	7.31411461872493	7.40512649238161	7.54712736951037	7.76241142920207	7.71754698067002	0	7.33213034387168	0	0	0	5.87564283679496	7.76531435106389	0	0	9.33338100965064	7.19726703368685	0	0	0	6.70811613462149	0	0	6.9821365247176	0	0	0	10.022108559577	8.48379115278528	8.27175188255571	0	7.28918573772798	0	8.10094799849394	0	0	7.87848667435006	0	7.97463483452762	7.54071831101555	0
pos_03_winter_Fistax_3_2.B.3_01_17242	6.60248910847727	7.29748794533941	6.3712073698375	7.97288445058608	0	8.92021504653447	6.53319418441781	0	0	7.08893300002716	7.30412716881118	8.44791096139075	8.34733255388356	7.76652848985602	0	0	0	0	0	0	6.94238131815336	0	0	9.16652372921951	7.97811082838524	0	0	0	8.07239925916816	6.78636719580079	0	8.12026118264014	0	0	0	8.95253970650191	0	7.82119896185575	0	7.52649186172017	0	0	0	0	6.31542942754286	6.21871166725493	7.2558890053511	7.54310428227361	0
pos_04_autumn_Hypcup_4_1.D.7_01_17208	7.20834148985305	0	0	0	0	8.29604993751467	0	0	0	7.05576752856562	0	8.42875508214413	7.3236616865076	7.12017917959253	0	0	0	7.34729712342025	0	0	7.21861779688541	0	0	8.78735032985547	7.88987840110584	0	0	0	7.43643133162671	6.86706765043437	0	7.2007761372216	0	0	0	9.56754584975154	8.08539373915559	0	0	0	7.1626461043242	6.88556371207703	0	6.98863686546766	6.45805469861109	0	6.9590882788314	7.03169569547197	0
pos_04_spring_Gripul_4_1.A.4_01_17278	0	7.23095810032549	0	0	0	7.87887549617966	0	0	6.54633434778435	8.16752699713072	0	6.19945385065051	6.7810485453047	8.36839913403398	0	0	0	0	0	6.17782999965598	7.91789854699591	0	0	8.43047889237251	8.80591342933316	0	0	0	7.74951245444814	8.71133694370056	0	6.6554712379215	0	0	0	8.08899648698477	0	7.04556052566756	0	7.03229960550874	0	8.23587314134454	0	0	7.83128089198552	8.10714278688563	7.69028209910044	7.53681586743804	0
pos_04_summer_Polstr_4_1.A.4_01_17173	0	0	0	0	0	8.32549598021097	0	0	0	7.8852021847485	0	9.75518212389372	7.1818443842292	7.36396597151213	0	0	0	0	0	0	7.61713354187925	0	0	8.7658860670825	7.40074413279666	0	0	0	8.93960456371511	0	0	0	0	0	0	9.39575802804038	9.10803238608109	7.05002017331453	0	6.1528167462405	0	7.32433583454671	0	0	6.67767019085086	0	8.29724341789319	7.56748810689966	0
pos_04_winter_Hypcup_4_2.B.4_01_17243	7.95562022946464	0	0	0	0	7.86311405851064	0	0	6.82894444933198	6.77490385680598	6.89734321763481	9.05040117093928	6.91339037198048	7.35040379557783	0	0	0	8.04198312783461	0	0	7.09667501980433	0	0	8.80841803085151	6.47981754229464	0	0	0	7.24219159837577	7.95405126595859	0	7.4567171366636	0	0	0	8.49661068164685	0	6.76138078609082	0	6.75203080382263	7.29304138497401	0	0	0	6.67425427395149	5.91332364592492	7.15376968693558	7.12139864494147	0
pos_05_autumn_Gripul_5_1.D.8_01_17209	6.92404586391812	7.52694948752097	0	0	0	8.61370038713139	6.26826639398848	0	0	6.76772474948806	7.59359734202525	9.7345643303878	7.50849765504447	6.79951060814445	0	5.86912232162237	8.06579064437099	0	0	0	7.43948478546413	0	0	8.72545174883015	6.33179362227061	0	0	0	8.47576057300315	7.73214125380172	0	7.59508373019013	0	8.68482253662084	0	9.45662980403208	8.65322470612935	6.55945658468193	0	7.02338194282651	0	7.61347452427167	0	6.52998296135331	7.18564915654315	0	8.09906663584005	6.73965666489709	0
pos_05_spring_Brarut_5_1.A.5_01_17279	6.26518613707533	0	0	0	5.70423410598876	8.58888461663489	0	6.18383990849942	6.82098358235778	7.35334530671029	0	8.2627246754292	6.9597376656208	8.0549248024381	0	0	0	0	0	0	8.16625969297396	0	0	8.97987148154047	9.13264776524419	0	0	0	8.48821265451848	10.3516441432979	0	7.56015287280243	6.92967099566098	0	0	9.17163118621046	0	7.27960523118104	0	6.1719406521028	0	7.96790362407462	0	0	7.90317034530586	6.3187736933036	7.83651906926031	6.81279830626653	0
pos_05_summer_Polstr_5_1.A.5_01_17174	7.05739524217074	7.13804561006561	0	0	0	8.57698066292012	0	0	0	6.91467048516275	0	9.68818553524897	7.99470898977359	6.900190565757	0	0	0	0	0	0	7.40640242989073	0	0	8.19718299197909	7.57787226374589	0	0	0	8.15081949483304	6.3169372962751	0	0	0	0	0	9.79575199954199	8.58009309407392	7.55352697250579	0	6.36352012041136	0	7.47148150728038	0	0	7.17898017188183	0	6.63413752807119	6.03383414347447	0
pos_05_winter_Brarut_5_2.B.5_01_17244	7.88532989271245	7.6091456540251	0	0	0	8.59778265493093	0	0	6.46151935925438	7.42525704761644	0	9.16086503917045	7.62286745312059	7.56594308995357	0	0	0	0	0	5.45198764528688	6.7301702895527	0	0	9.17425019780368	7.27337340320377	0	0	0	7.23631578072533	7.15455501855487	0	7.41769931426316	0	0	0	9.61410505465705	0	7.93784672759607	0	6.36422613169957	0	0	0	0	7.09479537344714	6.38745743504985	7.80463809323095	7.56435470409633	0
pos_06_autumn_Brarut_6_1.E.1_01_17210	7.46723652725526	0	0	0	0	9.04073640275518	0	0	0	6.77089461476384	0	8.9921584882812	7.26146117967085	7.17124484851785	0	0	0	0	0	0	7.22469661826122	0	0	8.61055882940294	6.18681749200063	0	0	0	7.23167509431084	7.01665190827314	0	7.53152665760376	0	0	0	8.83293177211266	7.23003495455957	6.35019164480764	0	6.0859574233137	0	0	0	0	0	0	7.53042843812248	6.45096624443832	0
pos_06_spring_Polstr_6_1.A.6_01_17280	0	0	0	0	0	8.6533050505871	7.44340985387008	0	0	7.04684315571676	0	0	6.99217684697627	7.82784263455091	0	0	0	8.97972545942304	0	0	7.18343308770401	0	0	8.52277085686276	7.20336980615962	0	0	0	6.80854722661901	8.46775676146205	0	0	0	8.589295327829	0	9.53925358585474	8.62680963773956	0	0	6.42526635176734	0	6.77863688797336	0	7.96761143776144	7.48154443424039	0	7.75195391315396	6.24061328823045	0
pos_06_summer_Polstr_6_1.A.6_01_17175	6.4069195892455	7.40627712069995	0	0	0	8.48421554674529	0	0	0	6.89220705436713	0	9.6759090347287	7.35350303618996	7.31148448127724	0	0	0	0	0	0	7.39827209209004	0	0	8.42635483688061	7.23438734221646	0	0	0	8.27538545889294	0	0	0	0	0	0	10.17956671937	9.26433229655805	7.76778037484219	0	5.96995074471144	0	6.43373475068373	0	0	5.81688026596229	0	7.74925834622551	8.53385268354227	0
pos_06_winter_Polstr_6_2.B.6_01_17245	6.60723109851705	7.52222990369079	0	0	0	8.18261706005078	0	0	0	6.56940792542749	0	9.06781205671755	7.42467191523379	7.31007245573116	0	0	0	0	0	0	7.43911972957116	0	0	8.46868219787506	6.53720396630805	0	0	0	7.13609172385553	7.35956540559591	0	0	0	0	0	8.66230981726139	8.53263298927226	0	0	0	0	5.59190297876676	0	0	6.52394989622503	0	8.16094826929059	6.27842720906036	0
pos_07_autumn_Polstr_7_1.E.2_01_17211	0	0	0	0	0	8.14326424966433	0	0	0	7.02628581119335	0	10.0905381952695	7.31618797942918	6.97167350621471	0	0	0	0	0	0	7.500250839612	0	0	8.24707604447242	6.97312989071593	0	0	0	7.64539196053125	0	0	6.2912999209323	0	0	0	9.87117463840138	7.92452232448051	0	0	6.06744473699639	0	0	0	0	6.30105731743062	0	7.38359595711088	6.69442707242635	0
pos_07_spring_Polstr_7_1.A.7_01_17281	6.78260013599615	7.46725764872125	0	0	0	8.53183546815309	0	0	0	7.13077808330084	0	9.27708406345307	6.97530551036407	6.56036879277154	0	0	0	0	0	0	6.54135462181894	5.21823465807448	0	8.69354266505419	8.48092895242517	0	0	0	8.15052601241156	8.54204119820408	0	0	0	0	0	8.85915434883935	8.1180275088516	0	0	0	0	6.10324745125707	0	6.60172306786165	6.04992211667956	0	7.90293532488212	7.72601668953517	0
pos_07_summer_Hypcup_7_1.A.7_01_17176	8.60748607835786	7.39164234886611	0	0	0	7.24944957119164	6.32889703682431	0	0	7.54584873517093	6.71634292582939	9.8602374959645	7.54427496356383	7.55351797424565	0	0	0	8.24629401669767	0	0	7.60206071028654	0	0	9.34790535385588	6.61227984006375	0	0	0	0	7.98208962907072	0	0	0	0	0	9.53910324616474	0	6.41590841381394	0	6.39448433452169	8.11191049791952	0	0	0	7.19885948923518	0	7.57193801063759	7.15627523266921	0
pos_07_winter_Polstr_7_2.B.7_01_17246	0	7.35473078460686	0	0	0	8.97744391531909	0	0	0	6.82438092933351	0	8.74209267386484	6.58291947569653	7.08049314187005	0	0	0	0	0	0	6.54585561750921	0	0	8.51008292250896	6.40231740928583	0	0	0	6.81050181221821	6.83817904256576	0	0	0	0	0	8.82620828498035	7.60055834681268	0	0	0	0	0	0	6.02143671743792	6.54839640037643	0	7.68531070131326	7.43100705910371	0
pos_08_autumn_Polstr_8_1.E.3_01_17214	7.11938137223355	0	0	0	0	8.16206704746736	0	0	0	7.1263874119921	0	9.57151631520289	6.62942599915714	6.53887090234014	0	0	0	0	0	0	7.27230811071699	0	0	8.35543562646069	6.53935395426265	0	0	0	7.66484518627168	6.09577956936919	0	0	0	0	0	8.46873459779462	8.36357339304648	0	0	0	0	5.47623825458744	0	0	6.59331001748961	0	7.7030064785658	7.61136948856692	0
pos_08_spring_Polstr_8_1.A.8_01_17284	6.80068302135179	0	0	0	0	8.31825704789156	0	0	0	7.35756695274946	0	8.74431564987113	0	7.4297257077639	0	0	0	8.56696801350805	0	0	6.58613433164296	5.99454507161	0	8.61022762036873	8.18115953229007	0	0	0	8.50486065736882	7.42831833965386	0	6.5843851804234	0	0	0	8.97372436329703	8.13799990667494	5.97637502068237	0	0	0	7.28468198941775	0	6.74915712378187	7.06917546807269	0	7.70167767877747	7.11677986514808	0
pos_08_summer_Gripul_8_1.A.8_01_17179	6.89675904135913	7.36484209421115	0	0	0	7.78963515178678	5.95616772541342	0	7.56579296000035	7.54046941937272	0	9.3217645265614	8.3361647182292	7.57952492704929	0	0	0	0	0	0	7.72734121502695	0	0	8.8836186660712	6.68044556123599	0	0	0	7.80785623221291	7.78212300827513	0	0	0	0	0	7.96222469455847	6.84792270519854	7.31538995913863	0	0	0	7.91755941755556	0	0	7.94006498712663	0	7.99911098644617	6.98573264988539	0
pos_08_winter_Polstr_8_2.B.8_01_17249	7.05828600359167	7.04215795859256	0	0	0	8.39161726994756	5.91731195857436	0	0	7.05110488325827	0	9.52651200356465	6.7097096350554	6.85599725612642	0	0	0	0	0	0	7.09438059832679	0	0	8.32964769035431	6.33090855411835	0	0	0	6.45296493858111	7.45140971467278	0	0	0	8.45709558751963	0	8.58859802487824	7.94745085007636	7.05860536354694	0	0	0	0	0	0	6.24890517186883	0	7.26618188785964	6.67326256891103	0
pos_09_autumn_Polstr_9_1.E.4_01_17215	7.18531566916179	0	0	0	0	8.02110993096221	0	0	0	7.40625663802236	0	0	7.02596007514741	6.59776095022169	0	0	0	0	0	0	7.57164001560431	0	0	9.09410121118145	6.72240875157441	0	0	0	7.98094722567389	5.86974387205629	0	0	0	0	0	9.1847627606626	8.32750375836097	0	0	6.67536399104699	0	0	0	0	6.64913257755816	0	7.87447830717218	7.06871435754474	0
pos_09_spring_Hypcup_9_1.B.1_01_17285	8.73577724399603	7.1261363074667	0	0	0	8.12357745358047	0	0	0	8.05055909263552	0	7.3972387943731	7.10164565814517	7.73094602676896	0	0	0	7.73373162566328	0	5.83125442085984	7.88246110208136	0	0	8.63408607455996	8.89657548104547	0	0	5.62262042964721	0	8.75609245546101	0	7.58038833347639	0	0	0	8.76957519676434	0	7.75774465684148	0	6.52125915060956	8.29721248802106	8.22520913200719	0	0	6.66248881058016	6.98633168138613	8.1178294906318	7.33373819687547	0
pos_09_summer_Plaund_9_1.B.1_01_17180	7.70414834093605	7.7611922563687	0	0	0	8.13811587151645	6.03693492115274	0	0	7.45564430403816	7.3551273608077	6.72282447203121	7.72671715489559	7.50764942308101	0	0	0	0	0	6.9287671123157	8.05924811596925	0	0	8.59868676026333	6.39179959585761	0	0	0	0	0	0	6.3355860249751	0	0	0	8.82007615287311	0	7.86731137869885	6.90444580872165	6.14294666950096	0	0	0	0	7.53803008294782	0	7.69267000799519	7.76411368268263	0
pos_09_winter_Gripul_9_2.C.1_01_17250	6.14290759138198	0	0	7.78714382384285	0	7.77319122418829	0	0	0	7.29095445585059	7.7051573096315	7.96679063105693	7.248105700001	7.43548209380424	0	0	0	0	0	0	8.07367103363574	0	0	8.69848241553813	7.33961524342116	0	0	0	8.44233354661761	7.39312821137105	0	7.44633182751216	0	0	0	9.41823760933577	7.31842435625713	7.70499622320828	0	7.19543062413856	0	7.73136987644494	0	7.62220911093612	7.55552595134395	0	7.73986234122211	7.52348422037745	0
pos_10_autumn_Hypcup_10_1.E.5_01_17216	6.77031020216251	0	0	0	0	9.06796597170976	0	0	0	7.09025132055275	0	9.78952011393634	7.25678934036829	7.15956486120912	0	0	0	7.73893116159324	0	0	7.38683137862674	0	0	8.79534305272194	0	0	0	0	7.0542762228416	7.09253308944098	0	0	0	0	0	7.60566590878214	8.07558343813471	0	0	6.47933699458675	6.65953922613201	5.79012154236325	0	0	0	0	6.81788294973226	6.63865929582483	0
pos_10_spring_Brarut_10_1.B.2_01_17286	7.68768339652092	7.31939748003458	0	0	0	7.94161690972756	0	0	7.07739003049936	7.56611220074199	0	7.39917604033301	6.95392046244077	8.91563101446446	8.32078884138527	0	0	8.731330225545	0	0	7.61269487708972	0	0	9.20960873272286	6.60135319299638	0	0	0	0	9.22456669623997	0	7.06678773779814	0	0	0	8.7232176058639	7.66475293152812	7.56451748188765	0	0	0	0	0	0	7.18236426986607	6.9538363222497	7.82232533133599	7.10498048217044	0
pos_10_summer_Plaund_10_1.B.2_01_17181	6.51549796804727	7.2686647153778	0	0	0	7.24889109269075	0	0	0	7.15609535492611	8.98067250745458	7.19431847572587	8.11115451885143	7.65727785912859	0	0	0	0	0	7.56803178403884	7.93800354601482	0	0	8.12498085489225	6.32301858675254	0	0	0	7.63486422440491	0	0	6.59622134385898	0	0	0	8.27584595730198	0	7.92299450939928	0	6.76430071125001	0	7.38157799511175	0	0	7.04791467776475	0	7.88301494834505	7.48399764413737	0
pos_10_winter_Hypcup_10_2.C.2_01_17251	7.87441600905159	0	0	0	0	9.04161113958161	0	0	0	6.96538734191043	0	9.53374868638106	0	7.06041799519755	0	0	0	0	0	0	7.39071814704881	0	0	8.46161380888659	6.74751395836653	0	0	0	6.99731554272924	8.45091212019248	0	6.22143275736928	0	0	0	7.54011294915906	7.52934840160776	0	0	0	7.08057443936792	0	0	0	0	0	7.76161404155351	6.34630327633391	0
pos_11_autumn_Gripul_11_1.E.6_01_17217	0	7.12689601891454	0	0	0	9.01013177158351	0	0	0	6.9036933350895	7.41940997896944	9.94473330558682	7.00912840555969	7.19193372088222	0	0	8.0721047451122	0	0	0	7.3038566036773	0	0	8.28837236907211	0	0	0	0	8.19524757516865	7.53037757583776	0	7.34523918012972	0	8.94921157400557	0	9.34503017538378	0	7.11635621983173	0	0	0	7.3524724605577	0	6.575522184488	6.02708262470972	0	7.52271822419737	7.0814302490541	0
pos_11_spring_Brarut_11_1.B.3_01_17287	7.14076113988865	7.34312087852226	0	0	0	7.80553641487106	6.9801759355621	0	6.59304795437521	7.75898865872815	0	7.40354643196539	7.18392230705477	7.34060264762523	0	0	0	0	0	0	7.2657042310278	0	0	9.13448508464997	9.66136162043157	0	0	0	0	8.91601828735548	0	0	6.96076908244476	0	0	9.05214107436866	0	7.43155582041154	0	6.3657043222262	0	0	0	0	6.69354747417639	7.47524929338842	7.88510381883406	6.76658103978514	0
pos_11_summer_Plaund_11_1.B.3_01_17182	6.11471262219543	7.44231263357679	0	0	0	7.62770658854018	6.98010570756057	0	6.54535965014253	7.73498131625138	8.71877142666682	6.39675507857503	7.94405376997923	8.26228693871174	0	0	0	0	0	7.50925529706574	7.96282773842406	0	0	8.55708190208257	9.13956697644705	0	0	0	0	0	0	6.71609585973795	0	0	0	8.35543648053251	0	7.57853831281594	6.7441211577534	5.71680587229266	0	0	0	0	6.95665115184991	0	7.54164343186603	7.76916893204294	0
pos_11_winter_Plaund_11_2.C.3_01_17252	9.33481171098313	0	0	0	0	8.14287796861992	0	0	0	0	11.6773816790365	7.42449294215241	7.19067624964061	7.92834059018474	0	0	7.5012235525399	0	6.49445627642001	7.39120562480557	8.19678947569753	0	0	8.59725805515202	0	0	0	0	7.77172762984342	7.48987419822968	0	7.46430458856236	0	0	0	8.49103883782102	0	7.56406462297673	0	0	0	7.00232066201368	0	6.24460408663737	0	0	7.95840671450735	7.09654680263579	0
pos_12_autumn_Brarut_12_1.E.7_01_17218	7.48578879544118	0	0	0	5.8446357467802	9.05151691637943	7.25454499969815	0	0	6.55020852655737	0	8.81459746153713	7.33616131538994	7.38493048091602	0	0	0	0	0	0	6.84241326991719	0	0	8.80180406855438	6.47473385930899	0	0	0	7.54982028008625	6.82977136725134	0	7.90609409104099	0	0	0	8.52637567037074	7.20847856066325	7.53029690907678	0	6.7022499035015	0	5.85056263020871	0	0	6.58422769762807	0	6.98080670338988	7.49917489228404	0
pos_12_spring_Plaund_12_1.B.4_01_17288	0	0	0	0	0	7.7774912744906	6.66008390856359	0	0	7.91455961455089	9.22264779763234	7.18303151629616	7.17322701793805	6.89856669292772	0	0	0	0	0	0	8.40655314951872	0	0	9.0106314513865	9.82258795810313	0	0	0	7.83102207855771	7.97378484573332	0	7.56704185530391	0	0	0	8.40141703076341	0	7.52057862144601	0	6.70609504440507	0	0	0	0	8.3056451515566	7.39767960813798	8.35148036686144	7.44061870738417	0
pos_12_summer_Rhysqu_12_1.B.4_01_17183	6.2345629632646	7.38429576557659	5.28017158021821	6.06676100915629	0	6.76527119081004	7.3548423954272	0	0	7.22102421771877	0	7.77382084476392	8.28375882737844	7.75561298262785	0	0	0	5.67581500557214	0	0	7.90997472197467	0	0	9.28933063617917	9.92019349634858	0	0	0	0	0	0	7.12978317370015	0	0	0	9.14424590868049	0	7.07614823618611	0	6.42908217823256	0	0	0	0	6.66415968500178	0	7.42985201642907	6.8350904174907	0
pos_12_winter_Plaund_12_2.C.4_01_17253	0	7.61071654349031	0	0	0	8.17404362888635	0	0	0	0	10.6104156633708	7.35991301964422	7.95945302534633	7.61489204506892	0	0	8.80737216900426	0	7.32174415313527	6.84683484578625	7.63581247890688	0	0	8.1243898411503	7.53591563793286	0	0	0	8.2773224784463	6.9867817071049	0	0	0	0	0	7.8972086186059	0	7.72472256310833	0	6.12123732247213	0	0	0	0	6.39050908741323	0	7.87414246431539	7.83810053766624	0
pos_13_autumn_Plaund_13_1.E.8_01_17219	0	0	0	0	0	8.29388221180099	6.98715150080563	0	0	0	10.9693863907589	7.63937713176415	7.34396499594944	7.07110551285067	0	6.43796717850841	8.82375146216134	0	8.17770626025736	7.83163353033629	8.4118226757084	0	0	8.08895147170734	7.23935164785657	6.48388906418879	0	0	8.14337888910156	7.21079514263922	0	0	0	0	0	8.01156856444231	0	7.4154690889309	0	0	0	6.92897500127226	0	6.74104120923462	6.93397258229917	0	8.1449140559412	7.75836917808779	0
pos_13_spring_Plaund_13_1.B.5_01_17289	0	7.3862397518884	0	0	0	7.60252069494715	0	0	0	7.47899532432279	9.64270895575236	7.92826679726942	7.22204999575571	7.88236934124149	0	0	0	0	0	0	7.91892991800116	0	0	9.00736345587743	8.91647804100915	0	0	0	8.10321432529914	7.30322392183962	0	7.24920652829337	0	0	0	8.9403904842793	0	7.88154456901451	0	6.48269527879935	0	0	0	0	7.47130920701632	0	7.70100429608145	6.79280041236927	0
pos_13_summer_Rhysqu_13_1.B.5_01_17184	7.42003744148038	7.56389882369769	0	0	0	7.12767737984161	7.71995545768541	0	0	7.00637760393646	0	6.79066563923487	6.96084461336996	7.50744046314709	0	0	0	0	0	0	7.65980378220507	0	0	8.52923628166265	7.14202094958474	0	0	0	7.75834061796101	6.81841261338769	0	7.15603310143879	0	0	0	9.11377967571293	9.63809875170755	7.12994877914063	0	0	0	0	0	0	7.6266969039172	0	8.13981771432734	6.97770363384943	0
pos_13_winter_Plaund_13_2.C.5_01_17254	8.3443103765851	7.63278975539443	0	0	0	8.56355549792147	7.40500107282471	0	0	0	11.0208722461268	7.73334551013722	8.02900249392375	7.3862432261622	0	0	0	0	0	7.04124157058962	7.22385092621984	0	0	8.50860797089197	7.92914434814838	0	0	0	7.4244329957999	7.47831131525289	0	7.89021570091421	0	0	0	8.3792275160184	0	6.95732189233714	0	0	0	6.03559773050977	0	8.44895500713093	0	0	7.87311320497236	7.4820924923602	0
pos_14_autumn_Plaund_14_1.F.1_01_17220	0	0	0	0	0	8.30903693409772	0	0	0	6.6106114420235	10.5205666581184	8.65605449393251	6.65128113365456	7.42307684819031	0	0	8.56376965043425	0	7.45989753194505	7.14119802839846	7.35122186875383	0	0	8.37952221479509	7.00693432868469	6.24321592435722	0	0	7.9164724358134	7.01244740131492	0	0	0	0	0	8.19806229207104	0	7.74738631253005	0	6.40167327927741	0	5.55923520082417	0	0	6.43004050177433	0	8.09986155371821	6.92096386032386	0
pos_14_spring_Plaund_14_1.B.6_01_17290	0	7.57563141969491	0	0	0	7.86660115859842	0	0	0	7.49439426889051	11.4117957323694	8.19540733994566	0	8.09717740883184	0	0	0	0	0	6.77060924139268	7.9154425189888	0	0	8.9387563415456	8.12197349438316	0	0	0	8.13701406578593	8.14722954902936	0	6.79089893881082	0	0	0	9.15514568189342	0	7.58496429428016	0	6.229824426388	0	0	0	0	7.67586219384342	6.9727280808062	7.9870529862403	6.94531430394055	0
pos_14_summer_Calcus_14_1.B.6_01_17185	7.03329381365273	7.80606227910308	0	0	0	8.00388116826917	6.3215485652995	0	0	6.99208246001267	0	7.81962673294382	7.20346447217929	7.50000397420415	0	0	0	7.78074189079051	0	0	8.43602472173895	0	0	9.17460032095098	10.0225912817746	0	0	0	8.16712494652837	6.79562187903689	0	7.45535759324814	0	0	0	9.46064175460072	0	7.72970959678819	0	6.33312297602084	0	0	0	0	6.97600347326584	0	7.46838845396569	6.81613986511601	0
pos_14_winter_Rhysqu_14_2.C.6_01_17255	8.08593824420217	7.75189363163813	0	0	0	8.68666059757253	0	0	0	7.0168103615779	8.23043069602384	7.88289060229942	0	6.97672632707307	0	0	0	0	0	0	6.72949426700634	0	0	8.78238254156862	7.53902226857849	0	0	0	7.21522021750544	7.0564786575293	0	6.42379454085843	0	0	0	8.06737521584696	0	6.0711031597682	0	0	0	0	0	0	6.57056022118864	0	8.21846015409037	7.02193981547647	0
pos_15_autumn_Plaund_15_1.F.2_01_17223	7.73460179260928	0	0	0	0	7.96365223859138	0	0	0	0	10.5181875439623	8.85107403524421	6.72886638385805	7.40503033056141	0	0	8.64775257198491	0	6.66777825307202	7.1789187188202	7.64388935108606	0	0	8.47227198628812	7.10524127229586	0	0	0	7.1311521315462	7.78595539383709	0	7.09841774296754	0	0	0	7.97010169229968	7.63989399643649	7.86440336920372	0	6.0565085654603	0	0	0	0	6.67234147093469	0	7.93993913626664	7.73502692376487	0
pos_15_spring_Calcus_15_1.B.7_01_17293	7.57417981908872	0	0	0	0	7.35999709704912	0	6.84537077913125	7.12074182208688	7.66495792084322	0	6.27565427842931	6.89204625003884	8.17586322309833	0	0	0	8.6427322360287	0	0	8.17798596612086	0	0	9.40517765077446	9.34976673623835	0	0	0	0	9.35413865962693	8.07412458806846	7.55056522971826	7.18747896733687	0	0	8.86026747059546	0	8.17261069537159	0	6.89094001460911	0	0	0	0	6.65596396682387	7.16707357888928	7.84886665072755	7.25026219131738	0
pos_15_summer_Calcus_15_1.B.7_01_17188	7.22733564793313	7.51031889168725	0	7.26647959520642	0	8.14366874569637	6.736190856201	0	0	6.80685752720555	0	7.98205297138048	7.68999791333421	7.45376920546764	0	0	0	9.59762701690874	0	5.27327644330455	7.56437623335328	0	0	9.25033738229053	9.56281358599805	0	0	0	8.45195766604832	7.05680927028081	0	7.59919085272136	0	0	0	9.25787403672359	0	7.53280653261884	0	6.66055760849371	0	0	0	0	7.3756404158066	0	8.36307814155622	6.60525684588792	0
pos_15_winter_Rhysqu_15_2.C.7_01_17258	8.10717126677172	7.5521244577987	0	0	0	8.47957577895591	0	0	0	7.56007378886319	6.70624981177156	7.67202832730147	8.01041917233331	8.02158526780878	0	0	0	0	0	0	7.10444694652411	0	0	8.81752037637498	8.24033730376931	0	0	0	7.81964032003731	7.56997711250338	0	7.53296058835581	0	0	0	9.79411134913097	8.28620756655887	7.15240810501613	0	0	0	6.85144671140717	0	0	0	0	7.6570022487205	7.7511206065619	0
pos_16_autumn_Calcus_16_1.F.3_01_17224	6.70512057521652	0	0	0	0	8.80647105990795	0	0	0	6.74301617549106	7.89943289699363	8.9170130617786	6.70398484497894	7.14038542988041	0	0	7.82108720791282	0	0	0	6.74109582000133	0	0	8.87925399644075	0	0	0	0	7.19016536351029	5.89144971777492	0	0	0	0	0	9.02915096090544	0	0	0	6.32676119091693	0	0	0	0	0	0	7.76225182493152	0	0
pos_16_spring_Rhysqu_16_1.B.8_01_17294	8.65901125228296	7.30805358846105	0	0	0	8.29276188272688	0	6.85502175999893	0	7.93506255227383	7.85211615462457	8.39292708600372	6.76566877483658	7.02447855328978	0	0	0	8.57492414257705	0	0	8.25165157785037	0	0	8.87805645369164	9.31175988455415	0	0	0	7.82020905916285	7.97647974094518	0	6.29033504504351	0	0	0	9.53071596676744	0	7.62740319259454	0	6.97364412395948	0	7.85306635359143	0	0	8.45140546367824	0	7.79781737523896	7.52519350881349	0
pos_16_summer_Rhysqu_16_1.B.8_01_17189	7.87278489420778	7.28636293292041	0	0	0	7.47555451951415	6.94739445660316	0	0	6.88363572716108	9.818049486594	7.95645556140776	7.68000726598527	7.89850564831139	0	0	0	6.30581003274865	0	0	8.0415567487987	0	0	9.22662327170401	7.03074075842953	0	0	0	7.53554473979505	7.15275207378386	0	7.65930242683044	0	0	0	9.84812295497899	9.1233609215785	8.64123361740282	0	6.24870080413447	0	0	0	0	7.50857333198295	0	7.97706233325767	7.18015288685106	0
pos_16_winter_Rhysqu_16_2.C.8_01_17259	8.31922086984426	7.91910358733052	0	0	0	8.69822784155355	0	0	0	7.21127049308899	6.57126909226361	6.750301148766	7.73628700901028	7.3048554275775	0	0	0	0	0	0	7.76390869305582	0	0	9.15385022044629	8.32037137424693	0	0	0	7.40110419590059	7.4152795392396	0	7.62506908016439	0	9.02127935595914	0	9.53830969230767	0	7.48968253244563	0	0	0	7.01075119481239	0	6.34080682262385	0	5.82837219120063	7.71497532578591	6.8419070964293	0
pos_17_autumn_Calcus_17_1.F.4_01_17225	6.72249621192643	7.85097611838687	0	0	0	8.86529904710342	0	0	0	6.6391337284691	0	9.62765039468001	6.99294900504474	7.57134851396083	0	0	7.10333378120746	7.39935649225238	0	0	7.01865985503962	0	0	8.9633019286985	0	0	0	0	7.5230826706572	6.7314086882388	0	6.75934727071498	0	0	0	9.1205319899259	0	0	0	0	0	0	0	0	0	0	7.6536988736789	6.67649497578096	0
pos_17_spring_Calcus_17_1.C.1_01_17295	8.35621002320964	7.46693163203431	0	0	0	7.78415355966693	0	7.75495018620888	7.51725162181763	7.95386026623685	0	7.83076822189706	6.89952147405504	6.99714791186351	0	0	0	8.67728515822115	0	0	7.66281415860149	0	0	9.19887734842484	9.16763737368157	0	0	0	0	9.06924947012543	8.11459869599623	7.22585694813413	8.75342788102025	0	0	9.074600130211	0	7.78570842762896	0	6.26860513595828	0	8.68482669060397	0	0	6.55994615534957	7.40799042104211	7.53372590184382	7.70492688597125	0
pos_17_summer_Calcus_17_1.C.1_01_17190	6.99702360714032	0	0	6.07415912009188	0	7.72942646108359	0	0	0	6.99470625414761	0	7.83426165304595	7.83845056532616	7.43325245307125	0	0	0	0	0	0	7.71044298729041	0	0	8.56363827481765	9.91146841007474	0	0	0	8.2765920681558	8.15029947638696	0	7.29272784185548	0	0	0	9.30776801866736	0	7.93729719316002	0	6.41930848195625	0	0	0	0	7.31868542652135	0	7.30057997549796	6.67508398251283	0
pos_17_winter_Calcus_17_2.D.1_01_17260	7.28484162565999	7.73185650866842	0	0	0	8.57286952338826	0	0	0	6.96229303746252	0	7.82006790176584	6.67980604443584	8.4879118466798	0	0	0	7.82939328864951	0	0	7.83250279737653	0	0	8.82266645892826	7.47117307236235	0	0	0	7.53573598890453	7.51186862664534	0	7.17284774549742	0	0	0	8.25033241062111	0	0	0	0	0	7.17646350974291	0	0	6.39670963101259	0	8.15498582897653	6.91056089585831	0
pos_18_autumn_Rhysqu_18_1.F.5_01_17226	7.08585794877447	7.90513860199188	0	0	0	8.48924676079249	0	0	0	6.21709768254855	0	9.52189485514424	6.81801217421939	7.09421258992455	0	0	0	0	0	0	6.64485166909405	0	0	8.63889590106458	6.44454854547674	0	0	0	7.69726835147867	7.18819834846632	0	7.28905635570649	0	0	0	8.38723394100555	7.93146255211918	0	0	6.43391024899504	0	0	0	0	0	0	7.28870793116076	6.7193455266797	0
pos_18_spring_Rhysqu_18_1.C.2_01_17296	8.19464910619365	7.48291252748412	0	0	0	8.09055719531737	0	7.510921713631	0	8.01260394761163	7.27417181911918	7.58644241519989	7.20459454605551	7.96393605060208	0	0	0	0	0	0	7.7781122233561	0	0	8.9000650339832	8.96127055837612	0	0	0	7.12116580904713	8.19818319404781	0	7.99364092641151	8.45394349424529	0	0	9.20597078057507	0	7.67995298285577	0	7.07574264123286	0	8.34089727895592	0	0	8.62982093236136	7.77815368389793	7.53974063095593	7.65204669515425	0
pos_18_summer_Brarut_18_1.C.2_01_17191	0	7.38297057174323	0	0	0	8.25721492020161	8.45404268939144	0	6.35931221265917	7.36489523915165	6.62954192064313	7.89867099219487	7.64028515790281	7.59288339259767	0	0	0	0	0	0	7.70138481904699	0	0	9.67175124090218	6.50130836405936	0	0	0	7.1080867033677	7.23367387001933	0	0	0	0	0	9.2867017348227	7.63775876523923	7.36671944698747	0	6.19959557225146	0	7.65037509347873	0	0	7.64347569886806	0	7.93816313526346	7.135198634692	0
pos_18_winter_Calcus_18_2.D.2_01_17261	7.03464657487812	7.97759347099511	0	0	0	8.26633477929454	0	0	0	7.31756963572814	0	7.78773641628255	0	7.21391676911543	0	0	0	7.55453700339083	0	0	7.56752146200975	0	0	8.75736910242666	7.43963803693901	0	0	0	7.47090445998261	7.71854148482947	0	7.34939929916668	0	0	0	9.52709415315867	0	7.34308244431629	0	0	0	6.85161065696391	0	0	6.34027588910663	0	8.0978000715134	6.84349043315397	0
pos_19_autumn_Rhysqu_19_1.F.6_01_17227	6.93640687371887	8.04896851454817	0	0	0	8.61504464537523	0	0	0	7.10279001705506	0	10.1672570957536	6.53954741922968	6.89694526070361	0	0	0	0	0	0	7.06096226450052	0	0	8.95135016382126	6.89199193777475	0	0	0	7.32703997517904	6.69974387753431	0	6.68837463902845	0	0	0	8.96358454839481	8.30574074235303	6.42148567311203	0	6.05570790750241	0	0	0	0	5.70614934881769	0	7.88483823491627	6.90330936419169	0
pos_19_spring_Rhysqu_19_1.C.3_01_17297	8.9715457922906	0	0	0	0	8.41037321841131	7.28154758722363	6.43895124992829	0	7.83285382790291	7.28478387484566	7.06802989644012	7.37867461787005	8.55567537889011	0	0	0	0	0	6.26717696046577	8.33968499977148	0	0	9.31744102609096	9.94907240472617	0	0	0	0	8.82673281617396	0	8.25686633003281	0	0	0	9.37350083774919	0	6.35835513323638	0	6.9803811032972	0	8.00434376718463	0	0	8.27048682966977	8.21748794721577	7.84503616805376	7.57749802798223	0
pos_19_summer_Brarut_19_1.C.3_01_17192	6.86763928518472	7.54583664460498	5.65942482530364	0	0	7.98511141549844	7.55405802621009	0	7.14495559345107	7.32512658272674	6.50675415214472	6.93175496863001	7.47121669936498	7.56473938703759	0	0	0	6.92646627425026	0	0	8.04480562166456	0	0	8.96309077901716	6.58631509284282	0	0	0	0	7.67164481229386	0	0	0	0	0	9.28257872569906	0	7.19373390138636	0	6.56024652022605	0	0	0	0	7.04323733847055	0	7.65314438678972	6.99397799561649	0
pos_19_winter_Calcus_19_2.D.3_01_17262	7.22609263969353	7.62637077120011	0	0	0	8.62677275038092	0	0	0	7.37009422669544	0	8.37091450941294	6.88981938824859	7.6053401413081	0	5.63769551975805	0	7.87819209217492	0	0	7.7631565039609	0	0	8.92744992279451	7.59182813208587	0	0	0	7.53670643974423	7.43667836667198	0	6.98916318144336	0	9.0443079833856	0	8.95565680319334	8.80964690819434	6.50523188977301	0	0	0	7.17630264502891	0	0	6.73334331869342	0	7.49551538797608	7.29426032573573	0
pos_20_autumn_Calcus_20_2.A.1_01_17228	5.88837513475211	7.96744867774377	0	0	0	8.6012658546132	0	0	0	6.63337097194595	0	8.99049113843366	0	7.48828237063649	0	0	0	7.75935131752448	0	0	7.33764988685253	0	0	8.52430956427716	0	0	0	0	7.74213940052828	7.14097591747202	0	6.4558119321442	0	0	0	8.48327626031195	0	0	0	0	0	5.43970060261166	0	0	0	0	7.22336646004656	6.60010312521453	0
pos_20_spring_Calcus_20_1.C.4_01_17298	7.84097531625299	7.2585149622114	0	0	0	7.9586892272809	0	0	7.24723262236698	7.68759027794227	8.66820174739206	6.64262285943344	7.13602780841785	7.37299005530275	0	0	0	9.31425163797886	0	0	8.14444598843469	0	0	8.47902213920811	9.60799826004208	0	0	0	0	9.76424274263084	8.79061887273022	7.077361576505	7.20778976371183	0	0	8.60875856948923	0	7.8714752493864	0	6.10468895800538	0	9.37092643113464	0	0	7.99092714210235	0	7.61294663637294	7.38988614653983	0
pos_20_summer_Hypcup_20_1.C.4_01_17193	6.30474083419315	7.46273978765188	0	7.93030663955168	0	8.18669338427896	7.70296290413215	0	0	7.90536882192469	0	8.46723779112281	7.86484400508855	7.26366190283856	0	0	0	9.45014060192766	0	0	7.72161039568977	0	0	9.08550163139804	9.12677234406037	0	0	0	0	10.3200602475442	0	6.46050145923326	0	0	0	9.26718667365841	0	7.49965384877458	0	0	7.34925361718776	0	0	0	7.12799766598595	0	7.54135460275798	7.95744317047197	0
pos_20_winter_Brarut_20_2.D.4_01_17263	9.04528602514023	7.2370752644307	0	0	0	9.22705908380418	7.62651903539081	0	0	6.83286873458893	6.34580927820834	9.04046906812957	8.87353181998377	7.08987482624311	0	0	0	6.96193390678887	0	0	7.70722810930812	0	0	9.00185424879921	6.42827973242523	0	0	0	7.5282027261238	10.0553443767013	0	8.25933232928803	0	0	0	8.76973607220393	0	5.65926616454771	0	5.82709537755951	0	0	0	0	6.23156781379072	0	7.2845788111269	7.14142827847299	0
pos_21_autumn_Rhysqu_21_2.A.2_01_17229	7.84107656420922	0	0	0	0	8.82357951660078	0	0	0	6.62149841395007	0	9.65016297669023	0	7.04705433163168	0	0	0	0	0	0	6.92421408664541	0	0	8.91451275819913	0	0	0	0	7.22086708358924	7.9590683914057	0	6.42315280325643	0	0	0	9.20585373603229	7.48823710170476	0	0	6.33350960835297	0	0	0	0	0	0	6.96665392017197	6.74288130964613	0
pos_21_spring_Hypcup_21_1.C.5_01_17299	9.52333925241176	0	0	0	0	8.0849286163361	7.97358194481844	0	0	7.83620405079731	0	8.15690155929416	7.08391470698015	7.221222150077	0	0	0	8.21907996987005	0	6.58060832992455	7.37919013353613	0	0	8.98324758825476	8.02308081869671	0	0	0	0	11.0174200115136	0	6.99106280517712	8.66726913505603	0	6.59334944023551	9.85730220960976	0	7.78858943366343	0	0	7.77601166698272	0	0	0	6.8464116487411	7.41340834812322	8.34747604030087	7.34370591651428	0
pos_21_summer_Hypcup_21_1.C.5_01_17194	5.88837513475211	7.84127430218115	0	0	0	8.05799080759979	7.56500003274469	0	0	7.11012980880707	0	7.5030834352176	7.78812200159823	8.60232817743075	0	0	0	9.04391901437175	0	6.32464740004184	7.7917147040273	0	0	9.36876509452996	7.06074585758066	0	0	0	6.39850175215723	9.63277415041717	0	0	0	0	0	9.00809722787517	0	6.81825630138722	0	0	7.32795143052045	0	7.63142182664573	0	7.2696482909754	0	6.90539875455823	6.44357227697096	0
pos_21_winter_Hypcup_21_2.D.5_01_17264	8.75768601005749	0	0	0	0	8.13953077531552	7.76961198385947	0	0	6.97480150056476	0	10.0137912020395	0	7.12957257666522	0	0	0	7.00678613179598	0	0	7.41444877726445	0	0	9.00887747681132	7.1994652215202	0	0	0	7.48730813895716	8.44876007132194	0	6.56518569123895	0	0	0	8.69581853830149	0	7.14745265653699	0	0	7.03947731729087	0	0	0	6.48805885810088	0	7.50956647216311	7.01925524775132	0
pos_22_autumn_Hypcup_22_2.A.3_01_17232	0	0	0	0	0	8.44445750801268	0	0	0	6.47956866154027	0	10.1679228248318	7.01751917015169	7.47136418350447	0	0	0	7.03384750700964	0	0	6.36308327443232	0	0	9.13806481981245	6.75150138895807	0	0	0	7.28907488314204	6.49424055950851	0	7.15168097770604	0	8.76973646435818	0	7.57678594729546	7.94872538975651	6.67305683923275	0	6.26631371040386	6.10716541656004	0	0	6.01446973304212	6.08038594095877	0	7.66894981750533	0	0
pos_22_spring_Hypcup_22_1.C.6_01_17301	8.15110147711276	7.32074379294374	0	0	0	7.07855750704217	8.850734164651	0	7.68653077732029	7.75428943915109	0	7.52015059138276	7.14676554868055	7.38173381922013	0	0	0	0	0	6.5073306662068	8.0479895506658	0	0	9.16345605427706	8.43956425871876	0	0	6.54204305009409	8.1258461942193	10.8376874049833	0	7.72404709609382	0	0	6.43010953478442	9.87017303794014	0	8.12524961398791	0	6.8137648525355	7.38158751206951	8.79205217080703	0	0	7.02786646658587	8.0184583263193	7.05437366215379	7.32397626798835	0
pos_22_summer_Gripul_22_1.C.6_01_17197	0	7.37716533924351	5.50073562504112	0	0	7.09699989134935	7.25139179078737	0	7.31650401114385	7.3722824207846	0	9.78284135592789	7.76346533093155	8.19165018464013	0	0	0	0	0	6.70881946662851	7.9350641132995	0	0	9.1398274674628	9.49120256012676	0	0	0	7.18652321197003	8.75543933160365	0	6.89391832241194	0	0	0	9.14864502042631	0	7.92002889138023	0	6.56077262088629	0	0	0	0	7.75232141159621	0	7.5807899978095	6.85931156979025	0
pos_22_winter_Brarut_22_2.D.6_01_17267	8.61257721697875	0	5.31678577083107	0	0	8.66736396527535	7.78535662166828	0	0	7.25568166564846	0	8.3463293654536	8.45040644234304	7.57050562124639	0	0	0	9.05761486215804	0	0	7.18142767256482	0	0	9.39289401902261	7.53717056156799	0	0	0	7.48330030444889	8.09148403464192	0	7.22893372103443	0	0	0	9.0783074185001	0	6.61932292513964	0	0	6.57195138738967	0	0	0	6.44568372850875	0	7.93401136793914	7.4681829898505	0
pos_23_autumn_Gripul_23_2.A.4_01_17233	0	0	0	0	0	8.95194310130099	0	0	0	7.11143326618798	7.2426256317685	9.74815091456603	7.25484433383256	7.34376511091839	0	0	7.5742008373856	0	0	0	7.72208261627588	0	0	8.81697698493072	6.37942330944637	0	0	0	7.94242558790987	7.13640887919986	0	7.06357371019576	0	0	0	9.27482182659913	9.40483119664135	6.96625633493428	0	5.24344557169521	0	7.26883188388219	0	0	0	0	7.788826152172	6.43459932638186	0
pos_23_spring_Gripul_23_1.C.7_01_17302	6.24722822942899	7.22233425935182	0	0	0	6.56273911950677	7.50609605282279	0	6.91615018579735	7.37726983580057	0	7.12024225010782	6.84713865713368	8.06049249476732	0	0	0	0	0	6.39495468450562	7.64051255841337	0	0	8.39219683631237	9.45865078159665	0	0	0	7.32885985062976	9.92202467353455	0	7.71799250151061	0	0	0	9.22439215977188	7.2029081287352	7.43782808169377	0	6.15293723305521	0	8.05762137211523	0	0	8.01799273280886	7.43486369562996	6.90478211350272	6.53002984377444	0
pos_23_summer_Gripul_23_1.C.7_01_17198	0	7.23421819052884	0	0	0	0	7.933135034673	0	0	7.48166172843432	0	9.38290827809797	6.64435133137424	7.25206472429656	0	0	0	0	0	6.66225548070373	7.57975593962661	0	0	9.24055879013583	6.44714041265243	0	0	0	8.22843542060838	9.44857293260769	0	6.79569235226465	0	0	0	8.2341194761564	0	6.99744927404439	0	6.27509126485613	0	7.92828489175952	0	0	0	0	7.41719637104208	7.12741163709968	0
pos_23_winter_Gripul_23_2.D.7_01_17268	6.66131385625943	7.18378488057451	0	6.73995396495534	0	8.67971795339701	6.51022413125454	0	0	7.50955952266959	7.73494523147057	6.66826414358004	6.74412063779543	8.55610588790648	0	0	0	0	0	6.22162949291079	7.99513684967343	0	0	8.49937701052987	7.66277101323671	0	0	0	8.35493571793194	8.05730233633069	0	0	0	0	0	8.90119400729435	7.29217293060798	7.6182254806273	0	0	0	7.67622321895331	0	6.53225254215602	6.29655668106934	0	7.80384891576792	6.85535096764375	0
pos_24_autumn_Brarut_24_2.A.5_01_17234	7.2962125706693	0	0	7.32095043315221	6.37569886858573	8.84008395359368	0	0	0	6.6787948029131	0	8.59551663739062	6.58433825105866	7.34917114437592	0	0	0	0	0	0	7.00853049821752	0	0	8.51704658066941	6.52618551451039	0	0	0	7.81134589673204	6.5221238271005	0	6.85257443786738	0	0	0	9.07338222734281	0	6.82657993011266	0	5.89342439431605	0	0	0	0	0	0	7.57626954516975	6.6170490383399	0
pos_24_spring_Gripul_24_1.C.8_01_17303	6.28078976885026	0	0	0	0	7.88834757062241	7.66193735012796	0	7.64917369209731	7.83429325845183	0	8.34447061663096	6.95776755321362	7.19219108801785	0	0	0	0	0	6.04354643047749	7.49732368896667	0	0	8.45220448967369	9.61107775053355	0	0	5.84873959434993	7.36193054805956	10.1674521575701	0	7.45360474442073	0	0	0	7.79013002181038	0	7.49491174535087	0	6.61544875880707	0	8.32743552524458	0	0	6.77799407637347	7.84047920327109	7.22013703529384	7.25277301225408	0
pos_24_summer_Brarut_24_1.C.8_01_17199	6.93552158694234	0	0	0	0	7.98909118670501	8.37902339170901	0	7.74271342855681	6.98120739325095	0	9.28462171481462	7.84409801881922	7.50062102349412	0	0	0	0	0	0	7.95023128842596	0	0	9.19850016859839	9.50620949768341	0	0	0	0	10.7278374207327	0	7.05583118101658	0	0	0	9.52035154837201	0	7.87882560112472	0	7.00928219105697	0	0	0	0	7.4875372644777	0	8.07626114916559	8.00319587648461	0
pos_24_winter_Gripul_24_2.D.8_01_17269	0	0	0	0	0	8.28530390742906	5.85559327624513	0	0	7.04286782093099	7.44244422383614	8.58877887785151	6.80065324776601	7.24246778636949	0	0	0	0	0	0	7.60217542072223	0	0	8.50464774052201	6.10640354231263	0	0	0	8.06122324492467	7.7010201936221	0	0	0	8.7698910463211	0	8.69365339754849	0	6.54652856285683	0	0	0	7.14687387548325	0	0	5.59655354793834	5.51563099684921	7.56757076361658	6.82235267268126	0
pos_25_autumn_Marpol_25_2.A.6_01_17235	6.92666783323351	7.70124440320742	0	9.2660342319581	0	8.75960405172766	7.84789230669745	6.90850870936788	7.45627722976295	7.32723200429865	9.02408636369647	9.03139170584905	9.52922510838041	7.29107838158145	11.1379563042619	0	0	0	0	0	8.58886083544875	0	8.61471921108385	8.73770292200624	9.1081268517108	0	6.28588300408733	0	6.90738521051525	8.55970590896616	0	6.8304670243175	9.52679078221364	9.10426833051663	0	8.72699991747863	7.24312633894258	8.14117314815251	0	6.02981901979869	0	0	0	7.12516362274241	8.18544688035987	0	7.27485905313634	7.09870733977021	0
pos_25_spring_Marpol_25_1.D.1_01_17304	6.74588790188387	0	0	9.16770724760922	0	8.55183732159795	8.09198584138866	7.05062533027802	8.42889087388495	7.05572915011469	8.61251778020766	8.80938923132026	9.70159868564244	7.48439087840262	9.47871320039823	0	0	0	0	0	8.90439737918708	0	8.55414178680227	7.93532976170934	9.26022977224038	0	0	0	7.66402989194676	7.72169855138224	0	0	7.93822667565814	0	0	8.43350565022742	7.73417775687701	7.62389438065645	0	6.3685880493904	0	0	8.38137163551143	8.5952087173235	8.07687718459333	0	7.60331474763419	8.03854330439535	0
pos_25_summer_Marpol_25_1.D.1_01_17200	8.41958168559136	7.49077632060469	0	9.50921513369434	0	7.07813589653475	9.34315388198463	8.81091198342881	8.53435267937391	8.7150242516551	9.6843209078354	10.0359302089524	9.9947284412675	9.59211813704119	10.0713521086785	0	0	7.94151966532592	0	8.23169200310688	10.5164292803621	0	0	8.9650769754876	9.54066891757442	0	0	0	9.68422439839496	8.6116603846022	0	7.93650536235818	9.20954255380388	0	0	9.36512794673872	0	8.86473292377103	0	0	0	0	8.48286566035427	9.05740347048702	8.85414038016489	0	7.85140776056781	8.40159052663813	8.0080797011129
pos_25_winter_Marpol_25_2.E.1_01_17270	7.7870428024384	7.61146567185195	0	9.77178725758382	0	7.71066016609749	8.4529133248247	6.8330408383482	8.06542697187517	7.22780164148302	9.2984231560542	8.99979710263771	9.4775294585108	7.42108483433744	10.1972356776932	0	0	0	0	0	8.74355357317896	0	0	8.21748315751744	9.25713118412738	0	0	0	7.57849642222207	8.11840135562823	0	7.63997989320059	9.82255912264833	0	0	8.45501707242491	8.09527941260608	8.3433380610733	0	0	0	0	6.71634376712665	7.0364996194338	8.62601413004123	0	7.92775470300454	8.23796137345026	0
pos_26_autumn_Marpol_26_2.A.7_01_17236	6.77247149467294	7.56486462764383	0	9.48589732512332	0	8.59260263261815	9.74477529474089	7.23229555712794	7.35777032764345	7.50356747704096	8.93054392608445	8.95277543562048	9.64748454232055	7.05636284718426	8.99440735043335	0	5.97446758026304	0	0	0	8.4787052763675	0	8.45291319685779	8.6047239189486	9.64678039325785	0	5.99604155660109	0	7.50056020312734	8.44606732125774	0	6.892948193165	9.68229526126164	0	0	8.88341594976372	9.24199122266971	8.2773636206081	0	0	0	0	6.31902288702112	7.46945425161796	8.03137744697938	0	7.18034184253861	8.97713477904666	0
pos_26_spring_Marpol_26_1.D.2_01_17305	6.75070138891542	7.80726143175322	0	9.12302993232607	0	8.39463863513963	8.4441032052867	7.12881733749247	7.54903761126701	7.43578463426976	10.1784164411649	9.04821879338833	10.5118387298075	6.56091840712054	11.5725903793559	0	0	0	0	0	8.10560838557101	0	8.41319026809848	8.48504063631947	9.47772840003117	0	0	0	6.99747568324163	7.32113997802597	0	7.38619571804809	9.2199858232607	0	0	8.61654426224851	9.46936555593018	7.57822483065934	0	0	0	0	7.13711592148364	7.76194776372142	8.31535416666432	0	7.4954078323276	9.48717500972556	0
pos_26_summer_Marpol_26_1.D.2_01_17201	8.68696178845474	7.49883651083369	0	9.46626066569893	0	7.04622943599583	9.41502935684266	8.73221308297731	8.92140767782299	7.79373544033634	9.86227721873305	9.66237892536623	9.5613440144433	9.8560154785041	10.1504526249555	0	0	7.77939772102068	0	8.69378020376191	10.4619580927178	0	0	9.41665792241764	9.61965804939984	0	0	0	8.81200558261815	10.2026389593679	0	7.67980544105135	9.15827344507882	0	0	9.44813046668483	0	8.96402747231533	0	0	0	0	8.57745329974688	8.25138402006484	9.05512616847472	0	8.38757351466892	8.11713274269802	8.25646542715153
pos_26_winter_Marpol_26_2.E.2_01_17271	0	7.87240704592597	0	9.89902701913192	0	8.12476101525794	8.89863375281922	6.67187838400105	7.46827630349584	7.81573951407779	9.24083853870197	9.24333107570636	9.90622212323071	7.59129041146485	9.73537580647355	0	0	0	0	0	8.23068023528157	0	0	8.62501404160373	10.0412668354835	0	0	0	7.64659513012887	8.24859748981022	0	7.62831197450895	9.45593691239696	0	0	8.28964768653582	7.65901669532755	8.31264372006152	0	0	0	0	6.98999023170333	7.24686366947343	8.98513866119792	0	7.65423006902111	7.97100620430399	0
pos_27_autumn_Marpol_27_2.A.8_01_17237	0	7.48537038856277	0	9.09358417144412	0	8.08334296053524	8.1296296891211	6.2210818186045	6.82676927654595	7.45762646210134	8.67066985323529	8.53928740618929	8.96519049917347	7.1594812781117	9.55416183924434	0	0	0	0	0	8.11674001684572	0	8.69045039954148	8.48652766502486	9.19209904044061	0	0	0	6.67560571811071	7.53855400778419	0	6.70086025250001	9.34329009649631	0	0	8.67966848523056	8.92586721854333	7.77040878943051	0	0	0	0	0	6.31341584033331	8.07901066083062	0	7.60393974232533	9.68422876405378	0
pos_27_spring_Marpol_27_1.D.3_01_17306	0	7.30561936182483	0	9.32198851330681	0	8.84876603170664	8.36523438041575	7.15787616387808	8.40657182307564	7.33230996611033	8.3227457624944	8.92680087311484	10.4123858351729	8.02703611622466	10.8782849755824	0	0	0	0	0	8.90076073975236	0	8.40356967865189	7.82339884491816	10.4807123106392	0	6.50660678373799	0	7.86786283066112	6.93095041510347	0	6.68410660011248	7.67862076290239	0	0	9.12789835452037	0	7.63024396684312	0	0	0	0	8.25174605750056	8.84436755696511	8.15586849306582	0	7.54425532506059	7.56081600293843	0
pos_27_summer_Marpol_27_1.D.3_01_17202	8.8107949607784	7.69513684557673	0	9.4256586119165	0	7.46939351019565	9.43362151382438	8.25163693576098	8.72110980001609	7.17963271351695	9.48892350650124	10.3987200072917	10.2668249120373	9.46529504153181	9.72636898866875	0	0	0	0	0	10.5286551248702	0	0	8.52623909963433	9.67887603105158	0	0	0	7.99669362296142	8.99736677186129	0	7.97845974179687	8.59125924589489	0	0	9.43429922284337	0	8.94873777151535	0	0	0	0	8.36138345611721	8.75597494613191	9.0064423074901	0	8.27888051670627	8.89522593744558	7.43845344356669
pos_27_winter_Marpol_27_2.E.3_01_17272	6.65547123792151	7.80950354921466	0	9.3578693768233	0	8.81700156298932	10.4191319687882	6.71165599368427	7.42290758178998	6.98792973695058	10.190682613292	9.1788916477392	10.303279762044	7.31527114000123	11.9781790859573	0	0	0	0	0	9.59208294799017	0	0	8.56045761389947	9.45099958453093	0	6.04219251506199	0	7.67837188994501	7.66189576632703	0	7.41212150720902	9.68169040652317	8.89370611973674	0	9.00140874218146	7.51297644257863	8.11798539177227	0	6.0781686447493	0	9.34161528817157	6.37483514883353	7.00397713399339	8.49182368978816	5.80784737489614	7.83741110658272	7.70509972129994	0
[truncated: 5,000 more columns]
