# Supplementary material for: Chemical Diversity and Classification of Secondary Metabolites in Nine Bryophyte Species
Source: Metabolites. 2019 Oct 11;9(10):222. doi: 10.3390/metabo9100222 (PMC6835487; doi:10.3390/metabo9100222)
Supplement: Supplementary file 1 [file metabolites-09-00222-s001.zip › fig_s3b.csv]

	Lipids and lipid-like molecules	Fatty acids and conjugates	Steroids and steroid derivatives	Prenol lipids	Sesquiterpenoids	Lignans, neolignans and related compounds	Lactones	Phenylpropanoids and polyketides	Cinnamic acids	Stilbenes	Methoxyphenols	Flavonoids	Flavones	Flavans	Flavonoid glycosides	Anthocyanins	Carbohydrates and carbohydrate conjugates	Monosaccharides	Disaccharides	Glycosyl compounds	Alkaloids and derivatives	Amino acids	Peptides	Nucleosides, nucleotides, and analogues
pos_01_autumn_Fistax_1_1.D.4_01_17205	24	0	1	17	7	1	0	4	0	0	1	4	1	0	2	1	3	1	0	1	0	0	0	2
pos_01_spring_Fistax_1_1.A.1_01_17275	44	4	4	26	12	1	2	20	0	0	0	18	4	2	8	4	15	4	3	4	0	0	0	1
pos_01_summer_Fistax_1_1.A.1_01_17170	27	1	1	21	10	1	0	20	0	0	1	19	3	1	11	5	17	5	2	5	0	2	0	1
pos_01_winter_Fistax_1_2.B.1_01_17240	83	9	12	46	22	1	4	15	0	0	0	15	1	0	12	6	17	5	0	6	0	3	0	0
pos_02_autumn_Fistax_2_1.D.5_01_17206	92	3	13	53	26	0	4	10	0	0	0	9	2	1	4	2	12	3	3	3	0	2	1	3
pos_02_spring_Fistax_2_1.A.2_01_17276	125	1	16	79	37	2	3	16	0	0	0	16	3	2	7	3	11	3	1	4	0	0	0	10
pos_02_summer_Fistax_2_1.A.2_01_17171	32	2	2	22	10	1	1	18	0	0	1	18	3	1	10	5	16	5	1	5	0	1	0	4
pos_02_winter_Fistax_2_2.B.2_01_17241	33	0	2	25	11	0	1	13	0	0	0	13	3	1	6	3	10	3	1	3	0	0	0	1
pos_03_autumn_Fistax_3_1.D.6_01_17207	85	1	12	54	26	0	5	18	0	0	0	17	4	1	8	4	13	4	1	4	0	2	0	2
pos_03_spring_Fistax_3_1.A.3_01_17277	133	0	18	84	41	1	6	20	0	0	0	20	5	1	9	4	17	5	0	7	0	1	0	9
pos_03_summer_Fistax_3_1.A.3_01_17172	55	5	8	32	14	0	4	12	0	0	0	12	2	0	8	4	13	4	1	4	0	2	0	1
pos_03_winter_Fistax_3_2.B.3_01_17242	89	9	13	49	22	0	5	25	0	0	0	24	4	2	14	7	22	7	1	7	0	2	0	5
pos_04_autumn_Hypcup_4_1.D.7_01_17208	33	1	4	20	10	1	0	0	0	0	0	0	0	0	0	0	0	0	0	0	0	1	0	2
pos_04_spring_Gripul_4_1.A.4_01_17278	34	1	2	24	10	2	0	10	0	0	0	10	1	0	6	3	6	0	0	3	0	1	0	0
pos_04_summer_Polstr_4_1.A.4_01_17173	54	7	3	33	16	1	0	13	0	0	1	12	1	1	8	4	12	4	0	4	0	2	0	4
pos_04_winter_Hypcup_4_2.B.4_01_17243	38	1	3	24	11	0	1	3	0	0	0	3	0	0	2	1	2	0	0	1	0	1	0	1
pos_05_autumn_Gripul_5_1.D.8_01_17209	103	2	9	67	30	0	2	0	0	0	0	0	0	0	0	0	1	0	1	0	0	2	0	1
pos_05_spring_Brarut_5_1.A.5_01_17279	70	1	9	43	20	0	2	7	2	0	0	5	1	0	3	0	0	0	0	0	0	1	0	1
pos_05_summer_Polstr_5_1.A.5_01_17174	34	6	1	20	9	0	0	16	0	0	1	16	1	1	13	7	18	6	0	6	0	1	0	2
pos_05_winter_Brarut_5_2.B.5_01_17244	51	2	8	29	14	0	2	5	1	0	1	4	0	0	3	0	0	0	0	0	0	1	0	1
pos_06_autumn_Brarut_6_1.E.1_01_17210	33	4	4	18	9	0	1	12	1	0	0	11	0	0	11	4	12	4	0	4	0	1	0	0
pos_06_spring_Polstr_6_1.A.6_01_17280	45	1	1	34	15	2	0	20	0	0	3	17	3	3	7	3	9	2	2	3	0	1	0	3
pos_06_summer_Polstr_6_1.A.6_01_17175	28	6	2	16	7	0	0	1	0	0	0	1	0	0	1	1	0	0	0	0	0	2	0	2
pos_06_winter_Polstr_6_2.B.6_01_17245	10	0	2	6	3	1	1	17	0	0	1	16	1	1	13	7	20	6	1	7	0	0	0	3
pos_07_autumn_Polstr_7_1.E.2_01_17211	3	1	0	2	1	2	0	15	0	0	2	13	2	1	8	4	12	3	1	4	0	0	0	3
pos_07_spring_Polstr_7_1.A.7_01_17281	28	1	2	19	9	2	1	20	1	0	3	16	3	2	7	3	16	3	5	4	0	1	0	3
pos_07_summer_Hypcup_7_1.A.7_01_17176	42	9	5	21	10	2	0	14	0	0	0	13	2	0	9	3	12	4	0	4	0	3	0	1
pos_07_winter_Polstr_7_2.B.7_01_17246	15	0	2	11	5	1	1	16	0	0	1	14	2	0	10	5	16	5	0	6	0	0	0	3
pos_08_autumn_Polstr_8_1.E.3_01_17214	5	1	0	4	2	1	0	12	0	0	1	10	2	1	5	3	7	1	1	3	0	1	0	2
pos_08_spring_Polstr_8_1.A.8_01_17284	40	1	3	28	11	0	1	8	0	0	1	7	1	2	2	1	6	1	3	1	0	1	0	2
pos_08_summer_Gripul_8_1.A.8_01_17179	24	3	1	16	8	7	0	8	0	0	0	8	1	0	6	3	8	2	0	3	0	3	0	1
pos_08_winter_Polstr_8_2.B.8_01_17249	7	1	1	4	1	1	1	8	0	0	1	7	2	1	2	1	3	1	0	1	0	1	0	3
pos_09_autumn_Polstr_9_1.E.4_01_17215	21	1	2	14	7	1	0	14	1	1	2	10	2	2	4	2	8	1	2	3	0	2	0	4
pos_09_spring_Hypcup_9_1.B.1_01_17285	35	2	2	24	11	0	2	11	0	0	0	11	2	0	5	1	8	2	0	3	0	2	0	0
pos_09_summer_Plaund_9_1.B.1_01_17180	32	2	2	25	12	0	0	37	0	0	0	36	8	3	15	4	28	8	3	9	0	1	0	3
pos_09_winter_Gripul_9_2.C.1_01_17250	116	5	13	71	34	0	2	3	0	0	0	3	0	0	2	1	2	0	0	1	0	0	0	2
pos_10_autumn_Hypcup_10_1.E.5_01_17216	13	0	1	10	5	0	0	4	0	0	0	4	0	0	4	2	6	2	0	2	0	2	0	1
pos_10_spring_Brarut_10_1.B.2_01_17286	46	0	1	35	17	0	0	18	0	0	1	18	3	2	9	1	4	0	0	2	0	1	0	1
pos_10_summer_Plaund_10_1.B.2_01_17181	46	5	4	29	14	0	0	30	0	0	0	29	6	1	15	5	28	8	2	9	0	2	0	4
pos_10_winter_Hypcup_10_2.C.2_01_17251	10	1	1	6	2	1	0	7	0	0	0	7	0	0	4	1	4	0	0	2	0	0	0	1
pos_11_autumn_Gripul_11_1.E.6_01_17217	92	2	10	57	27	0	1	0	0	0	0	0	0	0	0	0	0	0	0	0	0	1	0	3
pos_11_spring_Brarut_11_1.B.3_01_17287	33	1	3	22	11	0	0	4	1	0	0	3	0	0	3	0	0	0	0	0	0	0	0	1
pos_11_summer_Plaund_11_1.B.3_01_17182	53	2	5	38	18	1	1	43	0	0	1	42	7	2	22	6	38	12	2	12	0	0	0	2
pos_11_winter_Plaund_11_2.C.3_01_17252	141	4	15	93	46	2	9	32	0	0	0	32	8	1	14	3	33	7	4	12	2	1	0	2
pos_12_autumn_Brarut_12_1.E.7_01_17218	26	3	3	16	8	0	1	0	0	0	0	0	0	0	0	0	0	0	0	0	0	1	0	1
pos_12_spring_Plaund_12_1.B.4_01_17288	49	2	5	32	16	3	1	54	0	0	0	53	12	4	22	5	38	10	3	14	0	0	0	3
pos_12_summer_Rhysqu_12_1.B.4_01_17183	33	5	2	21	10	0	0	3	0	0	0	3	0	0	2	0	0	0	0	0	0	3	0	2
pos_12_winter_Plaund_12_2.C.4_01_17253	78	1	9	52	22	3	3	37	0	0	0	37	8	2	18	5	28	6	5	10	0	1	0	0
pos_13_autumn_Plaund_13_1.E.8_01_17219	96	4	13	59	26	0	5	11	0	0	0	11	3	0	5	1	8	2	0	3	0	0	0	2
pos_13_spring_Plaund_13_1.B.5_01_17289	46	0	4	32	17	2	2	48	1	0	0	47	11	1	22	5	37	10	4	13	0	0	0	2
pos_13_summer_Rhysqu_13_1.B.5_01_17184	31	4	2	18	9	0	0	8	0	0	1	8	0	1	5	2	6	2	0	2	0	1	0	2
pos_13_winter_Plaund_13_2.C.5_01_17254	93	2	9	63	30	2	2	43	0	0	0	42	10	4	18	4	32	7	5	11	0	1	0	0
pos_14_autumn_Plaund_14_1.F.1_01_17220	57	2	6	38	16	0	2	13	0	0	0	13	3	0	6	1	14	3	3	4	0	1	0	3
pos_14_spring_Plaund_14_1.B.6_01_17290	68	2	4	50	23	0	2	28	1	0	0	27	7	1	11	2	25	7	2	8	0	0	0	2
pos_14_summer_Calcus_14_1.B.6_01_17185	54	2	8	34	17	0	4	0	0	0	0	0	0	0	0	0	2	0	2	0	0	3	0	0
pos_14_winter_Rhysqu_14_2.C.6_01_17255	36	0	4	24	12	0	2	7	0	0	1	6	1	0	4	2	5	1	1	2	0	1	0	1
pos_15_autumn_Plaund_15_1.F.2_01_17223	68	2	7	45	20	0	2	16	0	0	0	16	3	0	9	3	14	3	1	5	0	0	0	1
pos_15_spring_Calcus_15_1.B.7_01_17293	52	0	3	42	18	2	1	34	0	0	2	32	3	7	15	4	12	2	2	5	0	0	0	1
pos_15_summer_Calcus_15_1.B.7_01_17188	68	2	7	47	22	0	2	4	0	0	0	4	0	0	4	2	7	2	1	2	0	1	0	0
pos_15_winter_Rhysqu_15_2.C.7_01_17258	50	0	7	31	14	0	2	13	0	0	1	12	2	2	6	2	7	1	1	3	0	0	1	1
pos_16_autumn_Calcus_16_1.F.3_01_17224	7	0	0	7	3	0	0	0	0	0	0	0	0	0	0	0	0	0	0	0	0	1	0	1
pos_16_spring_Rhysqu_16_1.B.8_01_17294	25	2	2	17	8	0	0	35	1	0	2	32	4	4	17	7	16	2	1	8	0	2	0	1
pos_16_summer_Rhysqu_16_1.B.8_01_17189	88	7	12	49	22	1	2	11	0	0	0	11	1	2	6	2	6	2	0	3	1	3	0	3
pos_16_winter_Rhysqu_16_2.C.8_01_17259	57	1	7	36	16	0	2	8	0	0	0	7	1	2	2	1	4	1	1	1	0	1	0	1
pos_17_autumn_Calcus_17_1.F.4_01_17225	13	2	1	8	4	0	0	0	0	0	0	0	0	0	0	0	0	0	0	0	0	1	0	1
pos_17_spring_Calcus_17_1.C.1_01_17295	54	0	5	39	19	2	2	28	0	0	2	26	3	4	13	5	12	2	2	5	0	0	0	1
pos_17_summer_Calcus_17_1.C.1_01_17190	43	1	5	26	12	1	0	6	1	0	0	5	0	0	4	1	5	1	2	1	0	0	0	1
pos_17_winter_Calcus_17_2.D.1_01_17260	43	1	6	26	13	0	1	2	0	0	0	2	0	0	2	1	3	1	0	1	0	1	0	1
pos_18_autumn_Rhysqu_18_1.F.5_01_17226	9	0	0	6	3	0	0	6	0	0	0	6	1	2	1	0	0	0	0	0	0	1	0	1
pos_18_spring_Rhysqu_18_1.C.2_01_17296	35	1	4	23	11	1	1	36	1	0	1	34	4	3	20	8	25	5	2	11	0	1	0	1
pos_18_summer_Brarut_18_1.C.2_01_17191	24	1	2	18	9	0	0	3	1	0	0	2	0	0	1	0	0	0	0	0	0	1	0	1
pos_18_winter_Calcus_18_2.D.2_01_17261	51	1	7	30	14	0	3	0	0	0	0	0	0	0	0	0	0	0	0	0	0	1	0	2
pos_19_autumn_Rhysqu_19_1.F.6_01_17227	20	1	2	12	6	0	0	6	0	0	0	6	0	1	3	1	3	1	0	1	0	1	0	1
pos_19_spring_Rhysqu_19_1.C.3_01_17297	47	0	6	31	15	0	3	37	0	0	2	34	6	5	16	6	17	3	2	8	0	0	0	1
pos_19_summer_Brarut_19_1.C.3_01_17192	21	2	1	14	6	0	0	1	0	0	0	1	0	0	1	0	1	0	1	0	0	1	0	1
pos_19_winter_Calcus_19_2.D.3_01_17262	24	2	2	14	6	0	2	3	0	0	0	3	0	0	2	1	4	1	0	1	0	3	0	1
pos_20_autumn_Calcus_20_2.A.1_01_17228	8	2	0	5	2	0	0	0	0	0	0	0	0	0	0	0	0	0	0	0	0	1	0	1
pos_20_spring_Calcus_20_1.C.4_01_17298	90	1	9	63	30	1	5	23	0	0	0	23	3	3	11	2	7	1	1	3	0	1	0	2
pos_20_summer_Hypcup_20_1.C.4_01_17193	124	2	19	74	36	1	2	3	0	0	0	3	1	0	1	0	0	0	0	0	0	1	0	1
pos_20_winter_Brarut_20_2.D.4_01_17263	83	0	14	50	24	0	4	8	1	0	0	7	2	0	3	1	3	0	1	1	0	0	0	1
pos_21_autumn_Rhysqu_21_2.A.2_01_17229	12	1	0	8	4	0	0	3	0	0	0	3	0	1	1	0	0	0	0	0	0	2	0	1
pos_21_spring_Hypcup_21_1.C.5_01_17299	95	0	18	54	26	1	10	18	0	0	0	18	4	0	9	3	5	0	0	3	0	0	0	1
pos_21_summer_Hypcup_21_1.C.5_01_17194	36	3	3	22	10	1	1	10	0	0	0	10	0	0	9	5	10	3	1	3	0	3	0	0
pos_21_winter_Hypcup_21_2.D.5_01_17264	54	0	7	34	17	1	4	16	0	0	1	15	2	2	6	1	6	1	0	3	0	1	0	0
pos_22_autumn_Hypcup_22_2.A.3_01_17232	19	0	1	13	6	0	0	0	0	0	0	0	0	0	0	0	0	0	0	0	0	2	0	1
pos_22_spring_Hypcup_22_1.C.6_01_17301	89	4	13	50	22	3	6	13	0	0	0	13	3	0	6	1	5	1	0	2	0	2	0	1
pos_22_summer_Gripul_22_1.C.6_01_17197	57	2	1	43	21	0	0	4	0	0	0	4	0	0	3	1	5	0	3	1	0	3	0	3
pos_22_winter_Brarut_22_2.D.6_01_17267	79	0	11	48	23	0	6	8	1	0	0	7	0	1	4	1	3	0	1	1	0	1	0	1
pos_23_autumn_Gripul_23_2.A.4_01_17233	72	0	6	47	23	0	0	0	0	0	0	0	0	0	0	0	0	0	0	0	0	0	0	0
pos_23_spring_Gripul_23_1.C.7_01_17302	37	0	4	24	11	0	1	10	0	0	0	10	2	0	6	3	5	0	0	3	0	1	0	1
pos_23_summer_Gripul_23_1.C.7_01_17198	66	3	5	46	21	1	0	6	0	0	0	6	0	0	5	3	4	0	0	2	0	0	0	2
pos_23_winter_Gripul_23_2.D.7_01_17268	113	0	11	75	36	0	1	0	0	0	0	0	0	0	0	0	0	0	0	0	0	0	0	4
pos_24_autumn_Brarut_24_2.A.5_01_17234	12	2	1	6	3	0	0	0	0	0	0	0	0	0	0	0	1	0	1	0	0	1	0	1
pos_24_spring_Gripul_24_1.C.8_01_17303	66	1	7	40	19	0	3	14	0	0	0	13	3	0	7	3	8	1	1	3	0	0	0	2
pos_24_summer_Brarut_24_1.C.8_01_17199	160	10	29	85	41	0	11	15	1	0	0	14	1	0	12	6	18	5	1	6	0	0	0	1
pos_24_winter_Gripul_24_2.D.8_01_17269	97	0	8	66	29	0	2	0	0	0	0	0	0	0	0	0	0	0	0	0	0	0	0	1
pos_25_autumn_Marpol_25_2.A.6_01_17235	72	2	2	57	28	10	1	11	1	3	1	6	0	1	5	3	5	0	1	2	0	1	0	2
pos_25_spring_Marpol_25_1.D.1_01_17304	89	0	1	72	35	10	1	18	1	3	0	12	0	0	12	6	13	2	0	6	0	0	0	1
pos_25_summer_Marpol_25_1.D.1_01_17200	282	11	22	201	98	29	8	46	5	8	3	29	1	4	23	11	36	4	11	12	0	3	0	5
pos_25_winter_Marpol_25_2.E.1_01_17270	138	1	8	106	53	23	3	24	2	6	2	10	0	0	10	5	8	0	2	5	1	1	0	0
pos_26_autumn_Marpol_26_2.A.7_01_17236	63	0	3	50	25	15	1	20	0	6	2	11	0	0	11	6	10	1	0	5	0	0	0	1
pos_26_spring_Marpol_26_1.D.2_01_17305	102	2	6	76	38	11	1	12	1	3	2	7	1	0	5	2	4	0	0	3	0	1	0	3
pos_26_summer_Marpol_26_1.D.2_01_17201	299	14	21	215	104	37	6	59	4	11	4	36	4	8	19	10	29	2	9	11	0	3	0	8
pos_26_winter_Marpol_26_2.E.2_01_17271	134	1	8	104	51	19	1	26	0	7	1	16	1	1	14	7	14	0	2	7	0	0	0	2
pos_27_autumn_Marpol_27_2.A.8_01_17237	90	1	4	68	34	13	1	16	0	4	1	10	0	0	10	5	8	0	0	5	1	1	0	2
pos_27_spring_Marpol_27_1.D.3_01_17306	90	0	2	76	38	12	1	8	0	4	0	4	0	0	4	2	4	0	0	2	0	0	0	1
pos_27_summer_Marpol_27_1.D.3_01_17202	273	11	19	196	93	31	5	46	6	7	5	28	2	5	19	10	29	3	7	12	0	3	0	11
pos_27_winter_Marpol_27_2.E.3_01_17272	133	2	9	99	48	18	2	10	0	4	1	5	0	0	5	2	5	0	2	2	0	1	0	1
