# Supplementary material for: Chemical Diversity and Classification of Secondary Metabolites in Nine Bryophyte Species
Source: Metabolites. 2019 Oct 11;9(10):222. doi: 10.3390/metabo9100222 (PMC6835487; doi:10.3390/metabo9100222)
Supplement: Supplementary file 1 [file metabolites-09-00222-s001.zip › fig_s4.csv]

species	Lipids and lipid-like molecules	Fatty acids and conjugates	Steroids and steroid derivatives	Prenol lipids	Sesquiterpenoids	Lignans, neolignans and related compounds	Lactones	Phenylpropanoids and polyketides	Cinnamic acids	Stilbenes	Methoxyphenols	Flavonoids	Flavones	Flavans	Flavonoid glycosides	Anthocyanins	Carbohydrates and carbohydrate conjugates	Monosaccharides	Disaccharides	Glycosyl compounds	Alkaloids and derivatives	Amino acids	Peptides	Nucleosides, nucleotides, and analogues
Fistax	24	0	1	17	7	1	0	4	0	0	1	4	1	0	2	1	3	1	0	1	0	0	0	2
Fistax	44	4	4	26	12	1	2	20	0	0	0	18	4	2	8	4	15	4	3	4	0	0	0	1
Fistax	27	1	1	21	10	1	0	20	0	0	1	19	3	1	11	5	17	5	2	5	0	2	0	1
Fistax	83	9	12	46	22	1	4	15	0	0	0	15	1	0	12	6	17	5	0	6	0	3	0	0
Fistax	92	3	13	53	26	0	4	10	0	0	0	9	2	1	4	2	12	3	3	3	0	2	1	3
Fistax	125	1	16	79	37	2	3	16	0	0	0	16	3	2	7	3	11	3	1	4	0	0	0	10
Fistax	32	2	2	22	10	1	1	18	0	0	1	18	3	1	10	5	16	5	1	5	0	1	0	4
Fistax	33	0	2	25	11	0	1	13	0	0	0	13	3	1	6	3	10	3	1	3	0	0	0	1
Fistax	85	1	12	54	26	0	5	18	0	0	0	17	4	1	8	4	13	4	1	4	0	2	0	2
Fistax	133	0	18	84	41	1	6	20	0	0	0	20	5	1	9	4	17	5	0	7	0	1	0	9
Fistax	55	5	8	32	14	0	4	12	0	0	0	12	2	0	8	4	13	4	1	4	0	2	0	1
Fistax	89	9	13	49	22	0	5	25	0	0	0	24	4	2	14	7	22	7	1	7	0	2	0	5
Hypcup	33	1	4	20	10	1	0	0	0	0	0	0	0	0	0	0	0	0	0	0	0	1	0	2
Gripul	34	1	2	24	10	2	0	10	0	0	0	10	1	0	6	3	6	0	0	3	0	1	0	0
Polstr	54	7	3	33	16	1	0	13	0	0	1	12	1	1	8	4	12	4	0	4	0	2	0	4
Hypcup	38	1	3	24	11	0	1	3	0	0	0	3	0	0	2	1	2	0	0	1	0	1	0	1
Gripul	103	2	9	67	30	0	2	0	0	0	0	0	0	0	0	0	1	0	1	0	0	2	0	1
Brarut	70	1	9	43	20	0	2	7	2	0	0	5	1	0	3	0	0	0	0	0	0	1	0	1
Polstr	34	6	1	20	9	0	0	16	0	0	1	16	1	1	13	7	18	6	0	6	0	1	0	2
Brarut	51	2	8	29	14	0	2	5	1	0	1	4	0	0	3	0	0	0	0	0	0	1	0	1
Brarut	33	4	4	18	9	0	1	12	1	0	0	11	0	0	11	4	12	4	0	4	0	1	0	0
Polstr	45	1	1	34	15	2	0	20	0	0	3	17	3	3	7	3	9	2	2	3	0	1	0	3
Polstr	28	6	2	16	7	0	0	1	0	0	0	1	0	0	1	1	0	0	0	0	0	2	0	2
Polstr	10	0	2	6	3	1	1	17	0	0	1	16	1	1	13	7	20	6	1	7	0	0	0	3
Polstr	3	1	0	2	1	2	0	15	0	0	2	13	2	1	8	4	12	3	1	4	0	0	0	3
Polstr	28	1	2	19	9	2	1	20	1	0	3	16	3	2	7	3	16	3	5	4	0	1	0	3
Hypcup	42	9	5	21	10	2	0	14	0	0	0	13	2	0	9	3	12	4	0	4	0	3	0	1
Polstr	15	0	2	11	5	1	1	16	0	0	1	14	2	0	10	5	16	5	0	6	0	0	0	3
Polstr	5	1	0	4	2	1	0	12	0	0	1	10	2	1	5	3	7	1	1	3	0	1	0	2
Polstr	40	1	3	28	11	0	1	8	0	0	1	7	1	2	2	1	6	1	3	1	0	1	0	2
Gripul	24	3	1	16	8	7	0	8	0	0	0	8	1	0	6	3	8	2	0	3	0	3	0	1
Polstr	7	1	1	4	1	1	1	8	0	0	1	7	2	1	2	1	3	1	0	1	0	1	0	3
Polstr	21	1	2	14	7	1	0	14	1	1	2	10	2	2	4	2	8	1	2	3	0	2	0	4
Hypcup	35	2	2	24	11	0	2	11	0	0	0	11	2	0	5	1	8	2	0	3	0	2	0	0
Plaund	32	2	2	25	12	0	0	37	0	0	0	36	8	3	15	4	28	8	3	9	0	1	0	3
Gripul	116	5	13	71	34	0	2	3	0	0	0	3	0	0	2	1	2	0	0	1	0	0	0	2
Hypcup	13	0	1	10	5	0	0	4	0	0	0	4	0	0	4	2	6	2	0	2	0	2	0	1
Brarut	46	0	1	35	17	0	0	18	0	0	1	18	3	2	9	1	4	0	0	2	0	1	0	1
Plaund	46	5	4	29	14	0	0	30	0	0	0	29	6	1	15	5	28	8	2	9	0	2	0	4
Hypcup	10	1	1	6	2	1	0	7	0	0	0	7	0	0	4	1	4	0	0	2	0	0	0	1
Gripul	92	2	10	57	27	0	1	0	0	0	0	0	0	0	0	0	0	0	0	0	0	1	0	3
Brarut	33	1	3	22	11	0	0	4	1	0	0	3	0	0	3	0	0	0	0	0	0	0	0	1
Plaund	53	2	5	38	18	1	1	43	0	0	1	42	7	2	22	6	38	12	2	12	0	0	0	2
Plaund	141	4	15	93	46	2	9	32	0	0	0	32	8	1	14	3	33	7	4	12	2	1	0	2
Brarut	26	3	3	16	8	0	1	0	0	0	0	0	0	0	0	0	0	0	0	0	0	1	0	1
Plaund	49	2	5	32	16	3	1	54	0	0	0	53	12	4	22	5	38	10	3	14	0	0	0	3
Rhysqu	33	5	2	21	10	0	0	3	0	0	0	3	0	0	2	0	0	0	0	0	0	3	0	2
Plaund	78	1	9	52	22	3	3	37	0	0	0	37	8	2	18	5	28	6	5	10	0	1	0	0
Plaund	96	4	13	59	26	0	5	11	0	0	0	11	3	0	5	1	8	2	0	3	0	0	0	2
Plaund	46	0	4	32	17	2	2	48	1	0	0	47	11	1	22	5	37	10	4	13	0	0	0	2
Rhysqu	31	4	2	18	9	0	0	8	0	0	1	8	0	1	5	2	6	2	0	2	0	1	0	2
Plaund	93	2	9	63	30	2	2	43	0	0	0	42	10	4	18	4	32	7	5	11	0	1	0	0
Plaund	57	2	6	38	16	0	2	13	0	0	0	13	3	0	6	1	14	3	3	4	0	1	0	3
Plaund	68	2	4	50	23	0	2	28	1	0	0	27	7	1	11	2	25	7	2	8	0	0	0	2
Calcus	54	2	8	34	17	0	4	0	0	0	0	0	0	0	0	0	2	0	2	0	0	3	0	0
Rhysqu	36	0	4	24	12	0	2	7	0	0	1	6	1	0	4	2	5	1	1	2	0	1	0	1
Plaund	68	2	7	45	20	0	2	16	0	0	0	16	3	0	9	3	14	3	1	5	0	0	0	1
Calcus	52	0	3	42	18	2	1	34	0	0	2	32	3	7	15	4	12	2	2	5	0	0	0	1
Calcus	68	2	7	47	22	0	2	4	0	0	0	4	0	0	4	2	7	2	1	2	0	1	0	0
Rhysqu	50	0	7	31	14	0	2	13	0	0	1	12	2	2	6	2	7	1	1	3	0	0	1	1
Calcus	7	0	0	7	3	0	0	0	0	0	0	0	0	0	0	0	0	0	0	0	0	1	0	1
Rhysqu	25	2	2	17	8	0	0	35	1	0	2	32	4	4	17	7	16	2	1	8	0	2	0	1
Rhysqu	88	7	12	49	22	1	2	11	0	0	0	11	1	2	6	2	6	2	0	3	1	3	0	3
Rhysqu	57	1	7	36	16	0	2	8	0	0	0	7	1	2	2	1	4	1	1	1	0	1	0	1
Calcus	13	2	1	8	4	0	0	0	0	0	0	0	0	0	0	0	0	0	0	0	0	1	0	1
Calcus	54	0	5	39	19	2	2	28	0	0	2	26	3	4	13	5	12	2	2	5	0	0	0	1
Calcus	43	1	5	26	12	1	0	6	1	0	0	5	0	0	4	1	5	1	2	1	0	0	0	1
Calcus	43	1	6	26	13	0	1	2	0	0	0	2	0	0	2	1	3	1	0	1	0	1	0	1
Rhysqu	9	0	0	6	3	0	0	6	0	0	0	6	1	2	1	0	0	0	0	0	0	1	0	1
Rhysqu	35	1	4	23	11	1	1	36	1	0	1	34	4	3	20	8	25	5	2	11	0	1	0	1
Brarut	24	1	2	18	9	0	0	3	1	0	0	2	0	0	1	0	0	0	0	0	0	1	0	1
Calcus	51	1	7	30	14	0	3	0	0	0	0	0	0	0	0	0	0	0	0	0	0	1	0	2
Rhysqu	20	1	2	12	6	0	0	6	0	0	0	6	0	1	3	1	3	1	0	1	0	1	0	1
Rhysqu	47	0	6	31	15	0	3	37	0	0	2	34	6	5	16	6	17	3	2	8	0	0	0	1
Brarut	21	2	1	14	6	0	0	1	0	0	0	1	0	0	1	0	1	0	1	0	0	1	0	1
Calcus	24	2	2	14	6	0	2	3	0	0	0	3	0	0	2	1	4	1	0	1	0	3	0	1
Calcus	8	2	0	5	2	0	0	0	0	0	0	0	0	0	0	0	0	0	0	0	0	1	0	1
Calcus	90	1	9	63	30	1	5	23	0	0	0	23	3	3	11	2	7	1	1	3	0	1	0	2
Hypcup	124	2	19	74	36	1	2	3	0	0	0	3	1	0	1	0	0	0	0	0	0	1	0	1
Brarut	83	0	14	50	24	0	4	8	1	0	0	7	2	0	3	1	3	0	1	1	0	0	0	1
Rhysqu	12	1	0	8	4	0	0	3	0	0	0	3	0	1	1	0	0	0	0	0	0	2	0	1
Hypcup	95	0	18	54	26	1	10	18	0	0	0	18	4	0	9	3	5	0	0	3	0	0	0	1
Hypcup	36	3	3	22	10	1	1	10	0	0	0	10	0	0	9	5	10	3	1	3	0	3	0	0
Hypcup	54	0	7	34	17	1	4	16	0	0	1	15	2	2	6	1	6	1	0	3	0	1	0	0
Hypcup	19	0	1	13	6	0	0	0	0	0	0	0	0	0	0	0	0	0	0	0	0	2	0	1
Hypcup	89	4	13	50	22	3	6	13	0	0	0	13	3	0	6	1	5	1	0	2	0	2	0	1
Gripul	57	2	1	43	21	0	0	4	0	0	0	4	0	0	3	1	5	0	3	1	0	3	0	3
Brarut	79	0	11	48	23	0	6	8	1	0	0	7	0	1	4	1	3	0	1	1	0	1	0	1
Gripul	72	0	6	47	23	0	0	0	0	0	0	0	0	0	0	0	0	0	0	0	0	0	0	0
Gripul	37	0	4	24	11	0	1	10	0	0	0	10	2	0	6	3	5	0	0	3	0	1	0	1
Gripul	66	3	5	46	21	1	0	6	0	0	0	6	0	0	5	3	4	0	0	2	0	0	0	2
Gripul	113	0	11	75	36	0	1	0	0	0	0	0	0	0	0	0	0	0	0	0	0	0	0	4
Brarut	12	2	1	6	3	0	0	0	0	0	0	0	0	0	0	0	1	0	1	0	0	1	0	1
Gripul	66	1	7	40	19	0	3	14	0	0	0	13	3	0	7	3	8	1	1	3	0	0	0	2
Brarut	160	10	29	85	41	0	11	15	1	0	0	14	1	0	12	6	18	5	1	6	0	0	0	1
Gripul	97	0	8	66	29	0	2	0	0	0	0	0	0	0	0	0	0	0	0	0	0	0	0	1
Marpol	72	2	2	57	28	10	1	11	1	3	1	6	0	1	5	3	5	0	1	2	0	1	0	2
Marpol	89	0	1	72	35	10	1	18	1	3	0	12	0	0	12	6	13	2	0	6	0	0	0	1
Marpol	282	11	22	201	98	29	8	46	5	8	3	29	1	4	23	11	36	4	11	12	0	3	0	5
Marpol	138	1	8	106	53	23	3	24	2	6	2	10	0	0	10	5	8	0	2	5	1	1	0	0
Marpol	63	0	3	50	25	15	1	20	0	6	2	11	0	0	11	6	10	1	0	5	0	0	0	1
Marpol	102	2	6	76	38	11	1	12	1	3	2	7	1	0	5	2	4	0	0	3	0	1	0	3
Marpol	299	14	21	215	104	37	6	59	4	11	4	36	4	8	19	10	29	2	9	11	0	3	0	8
Marpol	134	1	8	104	51	19	1	26	0	7	1	16	1	1	14	7	14	0	2	7	0	0	0	2
Marpol	90	1	4	68	34	13	1	16	0	4	1	10	0	0	10	5	8	0	0	5	1	1	0	2
Marpol	90	0	2	76	38	12	1	8	0	4	0	4	0	0	4	2	4	0	0	2	0	0	0	1
Marpol	273	11	19	196	93	31	5	46	6	7	5	28	2	5	19	10	29	3	7	12	0	3	0	11
Marpol	133	2	9	99	48	18	2	10	0	4	1	5	0	0	5	2	5	0	2	2	0	1	0	1
