# Supplementary material for: Chemical Diversity and Classification of Secondary Metabolites in Nine Bryophyte Species
Source: Metabolites. 2019 Oct 11;9(10):222. doi: 10.3390/metabo9100222 (PMC6835487; doi:10.3390/metabo9100222)
Supplement: Supplementary file 1 [file metabolites-09-00222-s001.zip › fig_s5.csv]

seasons	Lipids and lipid-like molecules	Fatty acids and conjugates	Steroids and steroid derivatives	Prenol lipids	Sesquiterpenoids	Lignans, neolignans and related compounds	Lactones	Phenylpropanoids and polyketides	Cinnamic acids	Stilbenes	Methoxyphenols	Flavonoids	Flavones	Flavans	Flavonoid glycosides	Anthocyanins	Carbohydrates and carbohydrate conjugates	Monosaccharides	Disaccharides	Glycosyl compounds	Alkaloids and derivatives	Amino acids	Peptides	Nucleosides, nucleotides, and analogues
autumn	24	0	1	17	7	1	0	4	0	0	1	4	1	0	2	1	3	1	0	1	0	0	0	2
spring	44	4	4	26	12	1	2	20	0	0	0	18	4	2	8	4	15	4	3	4	0	0	0	1
summer	27	1	1	21	10	1	0	20	0	0	1	19	3	1	11	5	17	5	2	5	0	2	0	1
winter	83	9	12	46	22	1	4	15	0	0	0	15	1	0	12	6	17	5	0	6	0	3	0	0
autumn	92	3	13	53	26	0	4	10	0	0	0	9	2	1	4	2	12	3	3	3	0	2	1	3
spring	125	1	16	79	37	2	3	16	0	0	0	16	3	2	7	3	11	3	1	4	0	0	0	10
summer	32	2	2	22	10	1	1	18	0	0	1	18	3	1	10	5	16	5	1	5	0	1	0	4
winter	33	0	2	25	11	0	1	13	0	0	0	13	3	1	6	3	10	3	1	3	0	0	0	1
autumn	85	1	12	54	26	0	5	18	0	0	0	17	4	1	8	4	13	4	1	4	0	2	0	2
spring	133	0	18	84	41	1	6	20	0	0	0	20	5	1	9	4	17	5	0	7	0	1	0	9
summer	55	5	8	32	14	0	4	12	0	0	0	12	2	0	8	4	13	4	1	4	0	2	0	1
winter	89	9	13	49	22	0	5	25	0	0	0	24	4	2	14	7	22	7	1	7	0	2	0	5
autumn	33	1	4	20	10	1	0	0	0	0	0	0	0	0	0	0	0	0	0	0	0	1	0	2
spring	34	1	2	24	10	2	0	10	0	0	0	10	1	0	6	3	6	0	0	3	0	1	0	0
summer	54	7	3	33	16	1	0	13	0	0	1	12	1	1	8	4	12	4	0	4	0	2	0	4
winter	38	1	3	24	11	0	1	3	0	0	0	3	0	0	2	1	2	0	0	1	0	1	0	1
autumn	103	2	9	67	30	0	2	0	0	0	0	0	0	0	0	0	1	0	1	0	0	2	0	1
spring	70	1	9	43	20	0	2	7	2	0	0	5	1	0	3	0	0	0	0	0	0	1	0	1
summer	34	6	1	20	9	0	0	16	0	0	1	16	1	1	13	7	18	6	0	6	0	1	0	2
winter	51	2	8	29	14	0	2	5	1	0	1	4	0	0	3	0	0	0	0	0	0	1	0	1
autumn	33	4	4	18	9	0	1	12	1	0	0	11	0	0	11	4	12	4	0	4	0	1	0	0
spring	45	1	1	34	15	2	0	20	0	0	3	17	3	3	7	3	9	2	2	3	0	1	0	3
summer	28	6	2	16	7	0	0	1	0	0	0	1	0	0	1	1	0	0	0	0	0	2	0	2
winter	10	0	2	6	3	1	1	17	0	0	1	16	1	1	13	7	20	6	1	7	0	0	0	3
autumn	3	1	0	2	1	2	0	15	0	0	2	13	2	1	8	4	12	3	1	4	0	0	0	3
spring	28	1	2	19	9	2	1	20	1	0	3	16	3	2	7	3	16	3	5	4	0	1	0	3
summer	42	9	5	21	10	2	0	14	0	0	0	13	2	0	9	3	12	4	0	4	0	3	0	1
winter	15	0	2	11	5	1	1	16	0	0	1	14	2	0	10	5	16	5	0	6	0	0	0	3
autumn	5	1	0	4	2	1	0	12	0	0	1	10	2	1	5	3	7	1	1	3	0	1	0	2
spring	40	1	3	28	11	0	1	8	0	0	1	7	1	2	2	1	6	1	3	1	0	1	0	2
summer	24	3	1	16	8	7	0	8	0	0	0	8	1	0	6	3	8	2	0	3	0	3	0	1
winter	7	1	1	4	1	1	1	8	0	0	1	7	2	1	2	1	3	1	0	1	0	1	0	3
autumn	21	1	2	14	7	1	0	14	1	1	2	10	2	2	4	2	8	1	2	3	0	2	0	4
spring	35	2	2	24	11	0	2	11	0	0	0	11	2	0	5	1	8	2	0	3	0	2	0	0
summer	32	2	2	25	12	0	0	37	0	0	0	36	8	3	15	4	28	8	3	9	0	1	0	3
winter	116	5	13	71	34	0	2	3	0	0	0	3	0	0	2	1	2	0	0	1	0	0	0	2
autumn	13	0	1	10	5	0	0	4	0	0	0	4	0	0	4	2	6	2	0	2	0	2	0	1
spring	46	0	1	35	17	0	0	18	0	0	1	18	3	2	9	1	4	0	0	2	0	1	0	1
summer	46	5	4	29	14	0	0	30	0	0	0	29	6	1	15	5	28	8	2	9	0	2	0	4
winter	10	1	1	6	2	1	0	7	0	0	0	7	0	0	4	1	4	0	0	2	0	0	0	1
autumn	92	2	10	57	27	0	1	0	0	0	0	0	0	0	0	0	0	0	0	0	0	1	0	3
spring	33	1	3	22	11	0	0	4	1	0	0	3	0	0	3	0	0	0	0	0	0	0	0	1
summer	53	2	5	38	18	1	1	43	0	0	1	42	7	2	22	6	38	12	2	12	0	0	0	2
winter	141	4	15	93	46	2	9	32	0	0	0	32	8	1	14	3	33	7	4	12	2	1	0	2
autumn	26	3	3	16	8	0	1	0	0	0	0	0	0	0	0	0	0	0	0	0	0	1	0	1
spring	49	2	5	32	16	3	1	54	0	0	0	53	12	4	22	5	38	10	3	14	0	0	0	3
summer	33	5	2	21	10	0	0	3	0	0	0	3	0	0	2	0	0	0	0	0	0	3	0	2
winter	78	1	9	52	22	3	3	37	0	0	0	37	8	2	18	5	28	6	5	10	0	1	0	0
autumn	96	4	13	59	26	0	5	11	0	0	0	11	3	0	5	1	8	2	0	3	0	0	0	2
spring	46	0	4	32	17	2	2	48	1	0	0	47	11	1	22	5	37	10	4	13	0	0	0	2
summer	31	4	2	18	9	0	0	8	0	0	1	8	0	1	5	2	6	2	0	2	0	1	0	2
winter	93	2	9	63	30	2	2	43	0	0	0	42	10	4	18	4	32	7	5	11	0	1	0	0
autumn	57	2	6	38	16	0	2	13	0	0	0	13	3	0	6	1	14	3	3	4	0	1	0	3
spring	68	2	4	50	23	0	2	28	1	0	0	27	7	1	11	2	25	7	2	8	0	0	0	2
summer	54	2	8	34	17	0	4	0	0	0	0	0	0	0	0	0	2	0	2	0	0	3	0	0
winter	36	0	4	24	12	0	2	7	0	0	1	6	1	0	4	2	5	1	1	2	0	1	0	1
autumn	68	2	7	45	20	0	2	16	0	0	0	16	3	0	9	3	14	3	1	5	0	0	0	1
spring	52	0	3	42	18	2	1	34	0	0	2	32	3	7	15	4	12	2	2	5	0	0	0	1
summer	68	2	7	47	22	0	2	4	0	0	0	4	0	0	4	2	7	2	1	2	0	1	0	0
winter	50	0	7	31	14	0	2	13	0	0	1	12	2	2	6	2	7	1	1	3	0	0	1	1
autumn	7	0	0	7	3	0	0	0	0	0	0	0	0	0	0	0	0	0	0	0	0	1	0	1
spring	25	2	2	17	8	0	0	35	1	0	2	32	4	4	17	7	16	2	1	8	0	2	0	1
summer	88	7	12	49	22	1	2	11	0	0	0	11	1	2	6	2	6	2	0	3	1	3	0	3
winter	57	1	7	36	16	0	2	8	0	0	0	7	1	2	2	1	4	1	1	1	0	1	0	1
autumn	13	2	1	8	4	0	0	0	0	0	0	0	0	0	0	0	0	0	0	0	0	1	0	1
spring	54	0	5	39	19	2	2	28	0	0	2	26	3	4	13	5	12	2	2	5	0	0	0	1
summer	43	1	5	26	12	1	0	6	1	0	0	5	0	0	4	1	5	1	2	1	0	0	0	1
winter	43	1	6	26	13	0	1	2	0	0	0	2	0	0	2	1	3	1	0	1	0	1	0	1
autumn	9	0	0	6	3	0	0	6	0	0	0	6	1	2	1	0	0	0	0	0	0	1	0	1
spring	35	1	4	23	11	1	1	36	1	0	1	34	4	3	20	8	25	5	2	11	0	1	0	1
summer	24	1	2	18	9	0	0	3	1	0	0	2	0	0	1	0	0	0	0	0	0	1	0	1
winter	51	1	7	30	14	0	3	0	0	0	0	0	0	0	0	0	0	0	0	0	0	1	0	2
autumn	20	1	2	12	6	0	0	6	0	0	0	6	0	1	3	1	3	1	0	1	0	1	0	1
spring	47	0	6	31	15	0	3	37	0	0	2	34	6	5	16	6	17	3	2	8	0	0	0	1
summer	21	2	1	14	6	0	0	1	0	0	0	1	0	0	1	0	1	0	1	0	0	1	0	1
winter	24	2	2	14	6	0	2	3	0	0	0	3	0	0	2	1	4	1	0	1	0	3	0	1
autumn	8	2	0	5	2	0	0	0	0	0	0	0	0	0	0	0	0	0	0	0	0	1	0	1
spring	90	1	9	63	30	1	5	23	0	0	0	23	3	3	11	2	7	1	1	3	0	1	0	2
summer	124	2	19	74	36	1	2	3	0	0	0	3	1	0	1	0	0	0	0	0	0	1	0	1
winter	83	0	14	50	24	0	4	8	1	0	0	7	2	0	3	1	3	0	1	1	0	0	0	1
autumn	12	1	0	8	4	0	0	3	0	0	0	3	0	1	1	0	0	0	0	0	0	2	0	1
spring	95	0	18	54	26	1	10	18	0	0	0	18	4	0	9	3	5	0	0	3	0	0	0	1
summer	36	3	3	22	10	1	1	10	0	0	0	10	0	0	9	5	10	3	1	3	0	3	0	0
winter	54	0	7	34	17	1	4	16	0	0	1	15	2	2	6	1	6	1	0	3	0	1	0	0
autumn	19	0	1	13	6	0	0	0	0	0	0	0	0	0	0	0	0	0	0	0	0	2	0	1
spring	89	4	13	50	22	3	6	13	0	0	0	13	3	0	6	1	5	1	0	2	0	2	0	1
summer	57	2	1	43	21	0	0	4	0	0	0	4	0	0	3	1	5	0	3	1	0	3	0	3
winter	79	0	11	48	23	0	6	8	1	0	0	7	0	1	4	1	3	0	1	1	0	1	0	1
autumn	72	0	6	47	23	0	0	0	0	0	0	0	0	0	0	0	0	0	0	0	0	0	0	0
spring	37	0	4	24	11	0	1	10	0	0	0	10	2	0	6	3	5	0	0	3	0	1	0	1
summer	66	3	5	46	21	1	0	6	0	0	0	6	0	0	5	3	4	0	0	2	0	0	0	2
winter	113	0	11	75	36	0	1	0	0	0	0	0	0	0	0	0	0	0	0	0	0	0	0	4
autumn	12	2	1	6	3	0	0	0	0	0	0	0	0	0	0	0	1	0	1	0	0	1	0	1
spring	66	1	7	40	19	0	3	14	0	0	0	13	3	0	7	3	8	1	1	3	0	0	0	2
summer	160	10	29	85	41	0	11	15	1	0	0	14	1	0	12	6	18	5	1	6	0	0	0	1
winter	97	0	8	66	29	0	2	0	0	0	0	0	0	0	0	0	0	0	0	0	0	0	0	1
autumn	72	2	2	57	28	10	1	11	1	3	1	6	0	1	5	3	5	0	1	2	0	1	0	2
spring	89	0	1	72	35	10	1	18	1	3	0	12	0	0	12	6	13	2	0	6	0	0	0	1
summer	282	11	22	201	98	29	8	46	5	8	3	29	1	4	23	11	36	4	11	12	0	3	0	5
winter	138	1	8	106	53	23	3	24	2	6	2	10	0	0	10	5	8	0	2	5	1	1	0	0
autumn	63	0	3	50	25	15	1	20	0	6	2	11	0	0	11	6	10	1	0	5	0	0	0	1
spring	102	2	6	76	38	11	1	12	1	3	2	7	1	0	5	2	4	0	0	3	0	1	0	3
summer	299	14	21	215	104	37	6	59	4	11	4	36	4	8	19	10	29	2	9	11	0	3	0	8
winter	134	1	8	104	51	19	1	26	0	7	1	16	1	1	14	7	14	0	2	7	0	0	0	2
autumn	90	1	4	68	34	13	1	16	0	4	1	10	0	0	10	5	8	0	0	5	1	1	0	2
spring	90	0	2	76	38	12	1	8	0	4	0	4	0	0	4	2	4	0	0	2	0	0	0	1
summer	273	11	19	196	93	31	5	46	6	7	5	28	2	5	19	10	29	3	7	12	0	3	0	11
winter	133	2	9	99	48	18	2	10	0	4	1	5	0	0	5	2	5	0	2	2	0	1	0	1
