# Supplementary material for: Chemical Diversity and Classification of Secondary Metabolites in Nine Bryophyte Species
Source: Metabolites. 2019 Oct 11;9(10):222. doi: 10.3390/metabo9100222 (PMC6835487; doi:10.3390/metabo9100222)
Supplement: Supplementary file 1 [file metabolites-09-00222-s001.zip › fig_s6.csv]

species	season	Lipids and lipid-like molecules	Fatty acids and conjugates	Steroids and steroid derivatives	Prenol lipids	Sesquiterpenoids	Lignans, neolignans and related compounds	Lactones	Phenylpropanoids and polyketides	Cinnamic acids	Stilbenes	Methoxyphenols	Flavonoids	Flavones	Flavans	Flavonoid glycosides	Anthocyanins	Carbohydrates and carbohydrate conjugates	Monosaccharides	Disaccharides	Glycosyl compounds	Alkaloids and derivatives	Amino acids	Peptides	Nucleosides, nucleotides, and analogues
Fistax	autumn	24	0	1	17	7	1	0	4	0	0	1	4	1	0	2	1	3	1	0	1	0	0	0	2
Fistax	spring	44	4	4	26	12	1	2	20	0	0	0	18	4	2	8	4	15	4	3	4	0	0	0	1
Fistax	summer	27	1	1	21	10	1	0	20	0	0	1	19	3	1	11	5	17	5	2	5	0	2	0	1
Fistax	winter	83	9	12	46	22	1	4	15	0	0	0	15	1	0	12	6	17	5	0	6	0	3	0	0
Fistax	autumn	92	3	13	53	26	0	4	10	0	0	0	9	2	1	4	2	12	3	3	3	0	2	1	3
Fistax	spring	125	1	16	79	37	2	3	16	0	0	0	16	3	2	7	3	11	3	1	4	0	0	0	10
Fistax	summer	32	2	2	22	10	1	1	18	0	0	1	18	3	1	10	5	16	5	1	5	0	1	0	4
Fistax	winter	33	0	2	25	11	0	1	13	0	0	0	13	3	1	6	3	10	3	1	3	0	0	0	1
Fistax	autumn	85	1	12	54	26	0	5	18	0	0	0	17	4	1	8	4	13	4	1	4	0	2	0	2
Fistax	spring	133	0	18	84	41	1	6	20	0	0	0	20	5	1	9	4	17	5	0	7	0	1	0	9
Fistax	summer	55	5	8	32	14	0	4	12	0	0	0	12	2	0	8	4	13	4	1	4	0	2	0	1
Fistax	winter	89	9	13	49	22	0	5	25	0	0	0	24	4	2	14	7	22	7	1	7	0	2	0	5
Hypcup	autumn	33	1	4	20	10	1	0	0	0	0	0	0	0	0	0	0	0	0	0	0	0	1	0	2
Gripul	spring	34	1	2	24	10	2	0	10	0	0	0	10	1	0	6	3	6	0	0	3	0	1	0	0
Polstr	summer	54	7	3	33	16	1	0	13	0	0	1	12	1	1	8	4	12	4	0	4	0	2	0	4
Hypcup	winter	38	1	3	24	11	0	1	3	0	0	0	3	0	0	2	1	2	0	0	1	0	1	0	1
Gripul	autumn	103	2	9	67	30	0	2	0	0	0	0	0	0	0	0	0	1	0	1	0	0	2	0	1
Brarut	spring	70	1	9	43	20	0	2	7	2	0	0	5	1	0	3	0	0	0	0	0	0	1	0	1
Polstr	summer	34	6	1	20	9	0	0	16	0	0	1	16	1	1	13	7	18	6	0	6	0	1	0	2
Brarut	winter	51	2	8	29	14	0	2	5	1	0	1	4	0	0	3	0	0	0	0	0	0	1	0	1
Brarut	autumn	33	4	4	18	9	0	1	12	1	0	0	11	0	0	11	4	12	4	0	4	0	1	0	0
Polstr	spring	45	1	1	34	15	2	0	20	0	0	3	17	3	3	7	3	9	2	2	3	0	1	0	3
Polstr	summer	28	6	2	16	7	0	0	1	0	0	0	1	0	0	1	1	0	0	0	0	0	2	0	2
Polstr	winter	10	0	2	6	3	1	1	17	0	0	1	16	1	1	13	7	20	6	1	7	0	0	0	3
Polstr	autumn	3	1	0	2	1	2	0	15	0	0	2	13	2	1	8	4	12	3	1	4	0	0	0	3
Polstr	spring	28	1	2	19	9	2	1	20	1	0	3	16	3	2	7	3	16	3	5	4	0	1	0	3
Hypcup	summer	42	9	5	21	10	2	0	14	0	0	0	13	2	0	9	3	12	4	0	4	0	3	0	1
Polstr	winter	15	0	2	11	5	1	1	16	0	0	1	14	2	0	10	5	16	5	0	6	0	0	0	3
Polstr	autumn	5	1	0	4	2	1	0	12	0	0	1	10	2	1	5	3	7	1	1	3	0	1	0	2
Polstr	spring	40	1	3	28	11	0	1	8	0	0	1	7	1	2	2	1	6	1	3	1	0	1	0	2
Gripul	summer	24	3	1	16	8	7	0	8	0	0	0	8	1	0	6	3	8	2	0	3	0	3	0	1
Polstr	winter	7	1	1	4	1	1	1	8	0	0	1	7	2	1	2	1	3	1	0	1	0	1	0	3
Polstr	autumn	21	1	2	14	7	1	0	14	1	1	2	10	2	2	4	2	8	1	2	3	0	2	0	4
Hypcup	spring	35	2	2	24	11	0	2	11	0	0	0	11	2	0	5	1	8	2	0	3	0	2	0	0
Plaund	summer	32	2	2	25	12	0	0	37	0	0	0	36	8	3	15	4	28	8	3	9	0	1	0	3
Gripul	winter	116	5	13	71	34	0	2	3	0	0	0	3	0	0	2	1	2	0	0	1	0	0	0	2
Hypcup	autumn	13	0	1	10	5	0	0	4	0	0	0	4	0	0	4	2	6	2	0	2	0	2	0	1
Brarut	spring	46	0	1	35	17	0	0	18	0	0	1	18	3	2	9	1	4	0	0	2	0	1	0	1
Plaund	summer	46	5	4	29	14	0	0	30	0	0	0	29	6	1	15	5	28	8	2	9	0	2	0	4
Hypcup	winter	10	1	1	6	2	1	0	7	0	0	0	7	0	0	4	1	4	0	0	2	0	0	0	1
Gripul	autumn	92	2	10	57	27	0	1	0	0	0	0	0	0	0	0	0	0	0	0	0	0	1	0	3
Brarut	spring	33	1	3	22	11	0	0	4	1	0	0	3	0	0	3	0	0	0	0	0	0	0	0	1
Plaund	summer	53	2	5	38	18	1	1	43	0	0	1	42	7	2	22	6	38	12	2	12	0	0	0	2
Plaund	winter	141	4	15	93	46	2	9	32	0	0	0	32	8	1	14	3	33	7	4	12	2	1	0	2
Brarut	autumn	26	3	3	16	8	0	1	0	0	0	0	0	0	0	0	0	0	0	0	0	0	1	0	1
Plaund	spring	49	2	5	32	16	3	1	54	0	0	0	53	12	4	22	5	38	10	3	14	0	0	0	3
Rhysqu	summer	33	5	2	21	10	0	0	3	0	0	0	3	0	0	2	0	0	0	0	0	0	3	0	2
Plaund	winter	78	1	9	52	22	3	3	37	0	0	0	37	8	2	18	5	28	6	5	10	0	1	0	0
Plaund	autumn	96	4	13	59	26	0	5	11	0	0	0	11	3	0	5	1	8	2	0	3	0	0	0	2
Plaund	spring	46	0	4	32	17	2	2	48	1	0	0	47	11	1	22	5	37	10	4	13	0	0	0	2
Rhysqu	summer	31	4	2	18	9	0	0	8	0	0	1	8	0	1	5	2	6	2	0	2	0	1	0	2
Plaund	winter	93	2	9	63	30	2	2	43	0	0	0	42	10	4	18	4	32	7	5	11	0	1	0	0
Plaund	autumn	57	2	6	38	16	0	2	13	0	0	0	13	3	0	6	1	14	3	3	4	0	1	0	3
Plaund	spring	68	2	4	50	23	0	2	28	1	0	0	27	7	1	11	2	25	7	2	8	0	0	0	2
Calcus	summer	54	2	8	34	17	0	4	0	0	0	0	0	0	0	0	0	2	0	2	0	0	3	0	0
Rhysqu	winter	36	0	4	24	12	0	2	7	0	0	1	6	1	0	4	2	5	1	1	2	0	1	0	1
Plaund	autumn	68	2	7	45	20	0	2	16	0	0	0	16	3	0	9	3	14	3	1	5	0	0	0	1
Calcus	spring	52	0	3	42	18	2	1	34	0	0	2	32	3	7	15	4	12	2	2	5	0	0	0	1
Calcus	summer	68	2	7	47	22	0	2	4	0	0	0	4	0	0	4	2	7	2	1	2	0	1	0	0
Rhysqu	winter	50	0	7	31	14	0	2	13	0	0	1	12	2	2	6	2	7	1	1	3	0	0	1	1
Calcus	autumn	7	0	0	7	3	0	0	0	0	0	0	0	0	0	0	0	0	0	0	0	0	1	0	1
Rhysqu	spring	25	2	2	17	8	0	0	35	1	0	2	32	4	4	17	7	16	2	1	8	0	2	0	1
Rhysqu	summer	88	7	12	49	22	1	2	11	0	0	0	11	1	2	6	2	6	2	0	3	1	3	0	3
Rhysqu	winter	57	1	7	36	16	0	2	8	0	0	0	7	1	2	2	1	4	1	1	1	0	1	0	1
Calcus	autumn	13	2	1	8	4	0	0	0	0	0	0	0	0	0	0	0	0	0	0	0	0	1	0	1
Calcus	spring	54	0	5	39	19	2	2	28	0	0	2	26	3	4	13	5	12	2	2	5	0	0	0	1
Calcus	summer	43	1	5	26	12	1	0	6	1	0	0	5	0	0	4	1	5	1	2	1	0	0	0	1
Calcus	winter	43	1	6	26	13	0	1	2	0	0	0	2	0	0	2	1	3	1	0	1	0	1	0	1
Rhysqu	autumn	9	0	0	6	3	0	0	6	0	0	0	6	1	2	1	0	0	0	0	0	0	1	0	1
Rhysqu	spring	35	1	4	23	11	1	1	36	1	0	1	34	4	3	20	8	25	5	2	11	0	1	0	1
Brarut	summer	24	1	2	18	9	0	0	3	1	0	0	2	0	0	1	0	0	0	0	0	0	1	0	1
Calcus	winter	51	1	7	30	14	0	3	0	0	0	0	0	0	0	0	0	0	0	0	0	0	1	0	2
Rhysqu	autumn	20	1	2	12	6	0	0	6	0	0	0	6	0	1	3	1	3	1	0	1	0	1	0	1
Rhysqu	spring	47	0	6	31	15	0	3	37	0	0	2	34	6	5	16	6	17	3	2	8	0	0	0	1
Brarut	summer	21	2	1	14	6	0	0	1	0	0	0	1	0	0	1	0	1	0	1	0	0	1	0	1
Calcus	winter	24	2	2	14	6	0	2	3	0	0	0	3	0	0	2	1	4	1	0	1	0	3	0	1
Calcus	autumn	8	2	0	5	2	0	0	0	0	0	0	0	0	0	0	0	0	0	0	0	0	1	0	1
Calcus	spring	90	1	9	63	30	1	5	23	0	0	0	23	3	3	11	2	7	1	1	3	0	1	0	2
Hypcup	summer	124	2	19	74	36	1	2	3	0	0	0	3	1	0	1	0	0	0	0	0	0	1	0	1
Brarut	winter	83	0	14	50	24	0	4	8	1	0	0	7	2	0	3	1	3	0	1	1	0	0	0	1
Rhysqu	autumn	12	1	0	8	4	0	0	3	0	0	0	3	0	1	1	0	0	0	0	0	0	2	0	1
Hypcup	spring	95	0	18	54	26	1	10	18	0	0	0	18	4	0	9	3	5	0	0	3	0	0	0	1
Hypcup	summer	36	3	3	22	10	1	1	10	0	0	0	10	0	0	9	5	10	3	1	3	0	3	0	0
Hypcup	winter	54	0	7	34	17	1	4	16	0	0	1	15	2	2	6	1	6	1	0	3	0	1	0	0
Hypcup	autumn	19	0	1	13	6	0	0	0	0	0	0	0	0	0	0	0	0	0	0	0	0	2	0	1
Hypcup	spring	89	4	13	50	22	3	6	13	0	0	0	13	3	0	6	1	5	1	0	2	0	2	0	1
Gripul	summer	57	2	1	43	21	0	0	4	0	0	0	4	0	0	3	1	5	0	3	1	0	3	0	3
Brarut	winter	79	0	11	48	23	0	6	8	1	0	0	7	0	1	4	1	3	0	1	1	0	1	0	1
Gripul	autumn	72	0	6	47	23	0	0	0	0	0	0	0	0	0	0	0	0	0	0	0	0	0	0	0
Gripul	spring	37	0	4	24	11	0	1	10	0	0	0	10	2	0	6	3	5	0	0	3	0	1	0	1
Gripul	summer	66	3	5	46	21	1	0	6	0	0	0	6	0	0	5	3	4	0	0	2	0	0	0	2
Gripul	winter	113	0	11	75	36	0	1	0	0	0	0	0	0	0	0	0	0	0	0	0	0	0	0	4
Brarut	autumn	12	2	1	6	3	0	0	0	0	0	0	0	0	0	0	0	1	0	1	0	0	1	0	1
Gripul	spring	66	1	7	40	19	0	3	14	0	0	0	13	3	0	7	3	8	1	1	3	0	0	0	2
Brarut	summer	160	10	29	85	41	0	11	15	1	0	0	14	1	0	12	6	18	5	1	6	0	0	0	1
Gripul	winter	97	0	8	66	29	0	2	0	0	0	0	0	0	0	0	0	0	0	0	0	0	0	0	1
Marpol	autumn	72	2	2	57	28	10	1	11	1	3	1	6	0	1	5	3	5	0	1	2	0	1	0	2
Marpol	spring	89	0	1	72	35	10	1	18	1	3	0	12	0	0	12	6	13	2	0	6	0	0	0	1
Marpol	summer	282	11	22	201	98	29	8	46	5	8	3	29	1	4	23	11	36	4	11	12	0	3	0	5
Marpol	winter	138	1	8	106	53	23	3	24	2	6	2	10	0	0	10	5	8	0	2	5	1	1	0	0
Marpol	autumn	63	0	3	50	25	15	1	20	0	6	2	11	0	0	11	6	10	1	0	5	0	0	0	1
Marpol	spring	102	2	6	76	38	11	1	12	1	3	2	7	1	0	5	2	4	0	0	3	0	1	0	3
Marpol	summer	299	14	21	215	104	37	6	59	4	11	4	36	4	8	19	10	29	2	9	11	0	3	0	8
Marpol	winter	134	1	8	104	51	19	1	26	0	7	1	16	1	1	14	7	14	0	2	7	0	0	0	2
Marpol	autumn	90	1	4	68	34	13	1	16	0	4	1	10	0	0	10	5	8	0	0	5	1	1	0	2
Marpol	spring	90	0	2	76	38	12	1	8	0	4	0	4	0	0	4	2	4	0	0	2	0	0	0	1
Marpol	summer	273	11	19	196	93	31	5	46	6	7	5	28	2	5	19	10	29	3	7	12	0	3	0	11
Marpol	winter	133	2	9	99	48	18	2	10	0	4	1	5	0	0	5	2	5	0	2	2	0	1	0	1
