# Supplementary material for: Chemical Diversity and Classification of Secondary Metabolites in Nine Bryophyte Species
Source: Metabolites. 2019 Oct 11;9(10):222. doi: 10.3390/metabo9100222 (PMC6835487; doi:10.3390/metabo9100222)
Supplement: Supplementary file 1 [file metabolites-09-00222-s001.zip › table_1.csv]

compound_class	AUC.PR	TPR.FPR
Organic compounds; Lipids and lipid-like molecules	0.346835034633477	0.256756756756757
Organic compounds; Lipids and lipid-like molecules; Fatty Acyls; Fatty acids and conjugates	0.169630459311843	0.357142857142857
Organic compounds; Lipids and lipid-like molecules; Steroids and steroid derivatives	0.511340189385859	0.638888888888889
Organic compounds; Lipids and lipid-like molecules; Prenol lipids	0.139394691603365	0.375
Organic compounds; Lipids and lipid-like molecules; Prenol lipids; Sesquiterpenoids	0.177519309973204	0.666666666666667
Organic compounds; Lignans, neolignans and related compounds	0.722096549490627	0.75
Organic compounds; Organoheterocyclic compounds; Lactones	0.133015357091627	0.224137931034483
Organic compounds; Phenylpropanoids and polyketides	0.449644858222398	0.276595744680851
Organic compounds; Phenylpropanoids and polyketides; Cinnamic acids and derivatives; Cinnamic acids	0.023927028798676	0.333333333333333
Organic compounds; Phenylpropanoids and polyketides; Stilbenes	0.0281509228769895	0.25
Organic compounds; Benzenoids; Phenols; Methoxyphenols	0.084611244636909	0.321428571428571
Organic compounds; Phenylpropanoids and polyketides; Flavonoids	0.587348527126725	0.65625
Organic compounds; Phenylpropanoids and polyketides; Flavonoids; Flavones	0.464901642026733	0.636363636363636
Organic compounds; Phenylpropanoids and polyketides; Flavonoids; Flavans	0.094208892320346	0.428571428571429
Organic compounds; Phenylpropanoids and polyketides; Flavonoids; Flavonoid glycosides	0.815962207828736	0.896551724137931
Organic compounds; Phenylpropanoids and polyketides; Flavonoids; Flavonoid glycosides; Flavonoid O-glycosides; Anthocyanins	0.296898213803987	1
Organic compounds; Organic oxygen compounds; Organooxygen compounds; Carbohydrates and carbohydrate conjugates	0.594371721251168	0.567164179104478
Organic compounds; Organic oxygen compounds; Organooxygen compounds; Carbohydrates and carbohydrate conjugates; Monosaccharides	0.39800574883097	0.49
Organic compounds; Organic oxygen compounds; Organooxygen compounds; Carbohydrates and carbohydrate conjugates; Disaccharides	0.465272416765837	0.642857142857143
Organic compounds; Organic oxygen compounds; Organooxygen compounds; Carbohydrates and carbohydrate conjugates; Glycosyl compounds	0.619341799396219	0.598360655737705
Organic compounds; Alkaloids and derivatives	0.192117431295398	0.285714285714286
Organic compounds; Organic acids and derivatives; Carboxylic acids and derivatives; Amino acids, peptides, and analogues; Amino acids and derivatives; Amino acids	0.275666394585967	0.288461538461538
Organic compounds; Organic acids and derivatives; Carboxylic acids and derivatives; Amino acids, peptides, and analogues; Peptides	0.0917559038810153	0.2
Organic compounds; Nucleosides, nucleotides, and analogues	0.310661228060919	0.583333333333333
