# Supplementary material for: Chemical Diversity and Classification of Secondary Metabolites in Nine Bryophyte Species
Source: Metabolites. 2019 Oct 11;9(10):222. doi: 10.3390/metabo9100222 (PMC6835487; doi:10.3390/metabo9100222)
Supplement: Supplementary file 1 [file metabolites-09-00222-s001.zip › table_s1.csv]

	r2	pvals
Brarut	0.368702197203767	0.004995004995005
Calcus	0.354809151326585	0.00599400599400599
Fistax	0.188055167196815	0.477522477522478
Gripul	0.245323039831584	0.140859140859141
Hypcup	0.354584065740662	0.003996003996004
Marpol	0.807840956926688	0.000999000999000999
Plaund	0.620246768979535	0.000999000999000999
Polstr	0.4901514188703	0.000999000999000999
Rhysqu	0.240048356970144	0.147852147852148
