# Supplementary material for: Chemical Diversity and Classification of Secondary Metabolites in Nine Bryophyte Species
Source: Metabolites. 2019 Oct 11;9(10):222. doi: 10.3390/metabo9100222 (PMC6835487; doi:10.3390/metabo9100222)
Supplement: Supplementary file 1 [file metabolites-09-00222-s001.zip › table_s2.csv]

	r2	pvals
type.acrocarpous	0.014358113132017	0.457542457542458
type.pleurocarpous	0	1
type.liverwort	0.0185063200565164	0.363636363636364
growth_form.Turf	0.0139206415415172	0.472527472527473
growth_form.Mat	0.00914036805772824	0.641358641358641
growth_form.Cushion	0.0084063994049424	0.634365634365634
growth_form.Dendroid	0.0185063200565164	0.363636363636364
growth_form.Thalloid	0.00235156173528263	0.889110889110889
habitat_type.Woods, Shrubs	0.0139206415415172	0.472527472527473
habitat_type.Exposed Rocks	0.0295054607078207	0.208791208791209
habitat_type.Meadows, Herbaceous	0.0185063200565164	0.363636363636364
habitat_type.Ruderal, Banks	0.00544424247889818	0.746253746253746
substrate.Soil	0.0029089803688182	0.853146853146853
substrate.Turf, Soil	0.0139206415415172	0.472527472527473
substrate.Dead wood, Bark	0.00248505904409868	0.891108891108891
substrate.Firm rocks	0.00176585842144223	0.907092907092907
substrate.Soil, Turf	0.0185063200565164	0.363636363636364
substrate.Soil, Firm rocks	0.0277079255613812	0.218781218781219
substrate.Soil, Loose rocks	0.0061488755584003	0.737262737262737
life_strategy.colonist	0	1
life_strategy.perennial stayer competitive	0.0287319885335071	0.243756243756244
life_strategy.perennial stayer stress tolerant	0.00914036805772824	0.641358641358641
life_strategy.pioneer	0.0305515852150136	0.186813186813187
life_strategy.long-lived shuttle	0.0029089803688182	0.853146853146853
gametangia.autoicous	0.0292327938202375	0.220779220779221
gametangia.dioicous	0	1
gametangia.synoicous	0.0259848581642827	0.231768231768232
mean_spore_size	0.0265663886289056	0.245754245754246
sex_frequency.occasional	0	1
sex_frequency.common	0.0124728569685363	0.506493506493506
sex_frequency.very common	0.000493235606352245	0.973026973026973
sex_frequency.rare	0.00846846409743021	0.643356643356643
light_index	0.00853850541272704	0.627372627372627
temperature_index	0.0334706766781335	0.183816183816184
continentality_index	0.0116410549844093	0.551448551448551
moisture_index	0.0271782788484582	0.237762237762238
reaction_index	0.00700038171516417	0.699300699300699
nitrogen_index	0.00155055643891826	0.922077922077922
life_form_index.H	0.0131134181025305	0.502497502497502
life_form_index.C, E	0.0029089803688182	0.853146853146853
life_form_index.C	0.00176585842144223	0.907092907092907
life_form_index.H, C	0.00235156173528263	0.889110889110889
life_form_index.C,(E)	0.00914036805772824	0.641358641358641
life_form_index.T	0.0185063200565164	0.363636363636364
onsite_substrate.Soil	0.0343045505147539	0.135864135864136
onsite_substrate.Rock	0.00160608560559596	0.921078921078921
onsite_substrate.Rock_lean_soil	0.0136269089786526	0.46953046953047
onsite_light.shade	0	1
onsite_light.sunny	0.0135281964356391	0.493506493506494
onsite_light.half-shade	0.0201457304212198	0.351648351648352
onsite_moisture.fresh	0	1
onsite_moisture.wet	0.0651806078663497	0.028971028971029
onsite_moisture.dry	0.0289318210069153	0.233766233766234
onsite_moisture.damp	0.0312994331771874	0.191808191808192
onsite_exposition.W	0.0234287275696936	0.283716283716284
onsite_exposition.S	0.0304170489273042	0.183816183816184
onsite_exposition.SO	0.0132751229955015	0.34965034965035
onsite_exposition.N	0.0352494551483203	0.141858141858142
onsite_exposition.NW	0.00252719511582949	0.893106893106893
onsite_exposition.SW	0.0236300826624781	0.262737262737263
onsite_exposition.O	0.0520712101798686	0.0559440559440559
sample	1	1
species	0.354391385086792	0.000999000999000999
season	0.104224564002836	0.001998001998002
