# Supplementary figures and images for: Chemical Diversity and Classification of Secondary Metabolites in Nine Bryophyte Species
Source: MDPI journal article supplement (doi:10.3390/metabo9100222), 2019-10-11

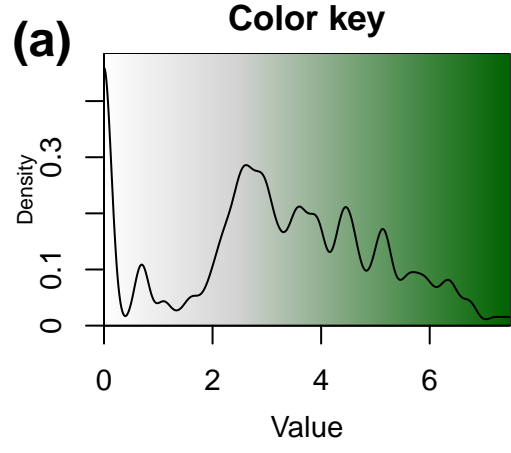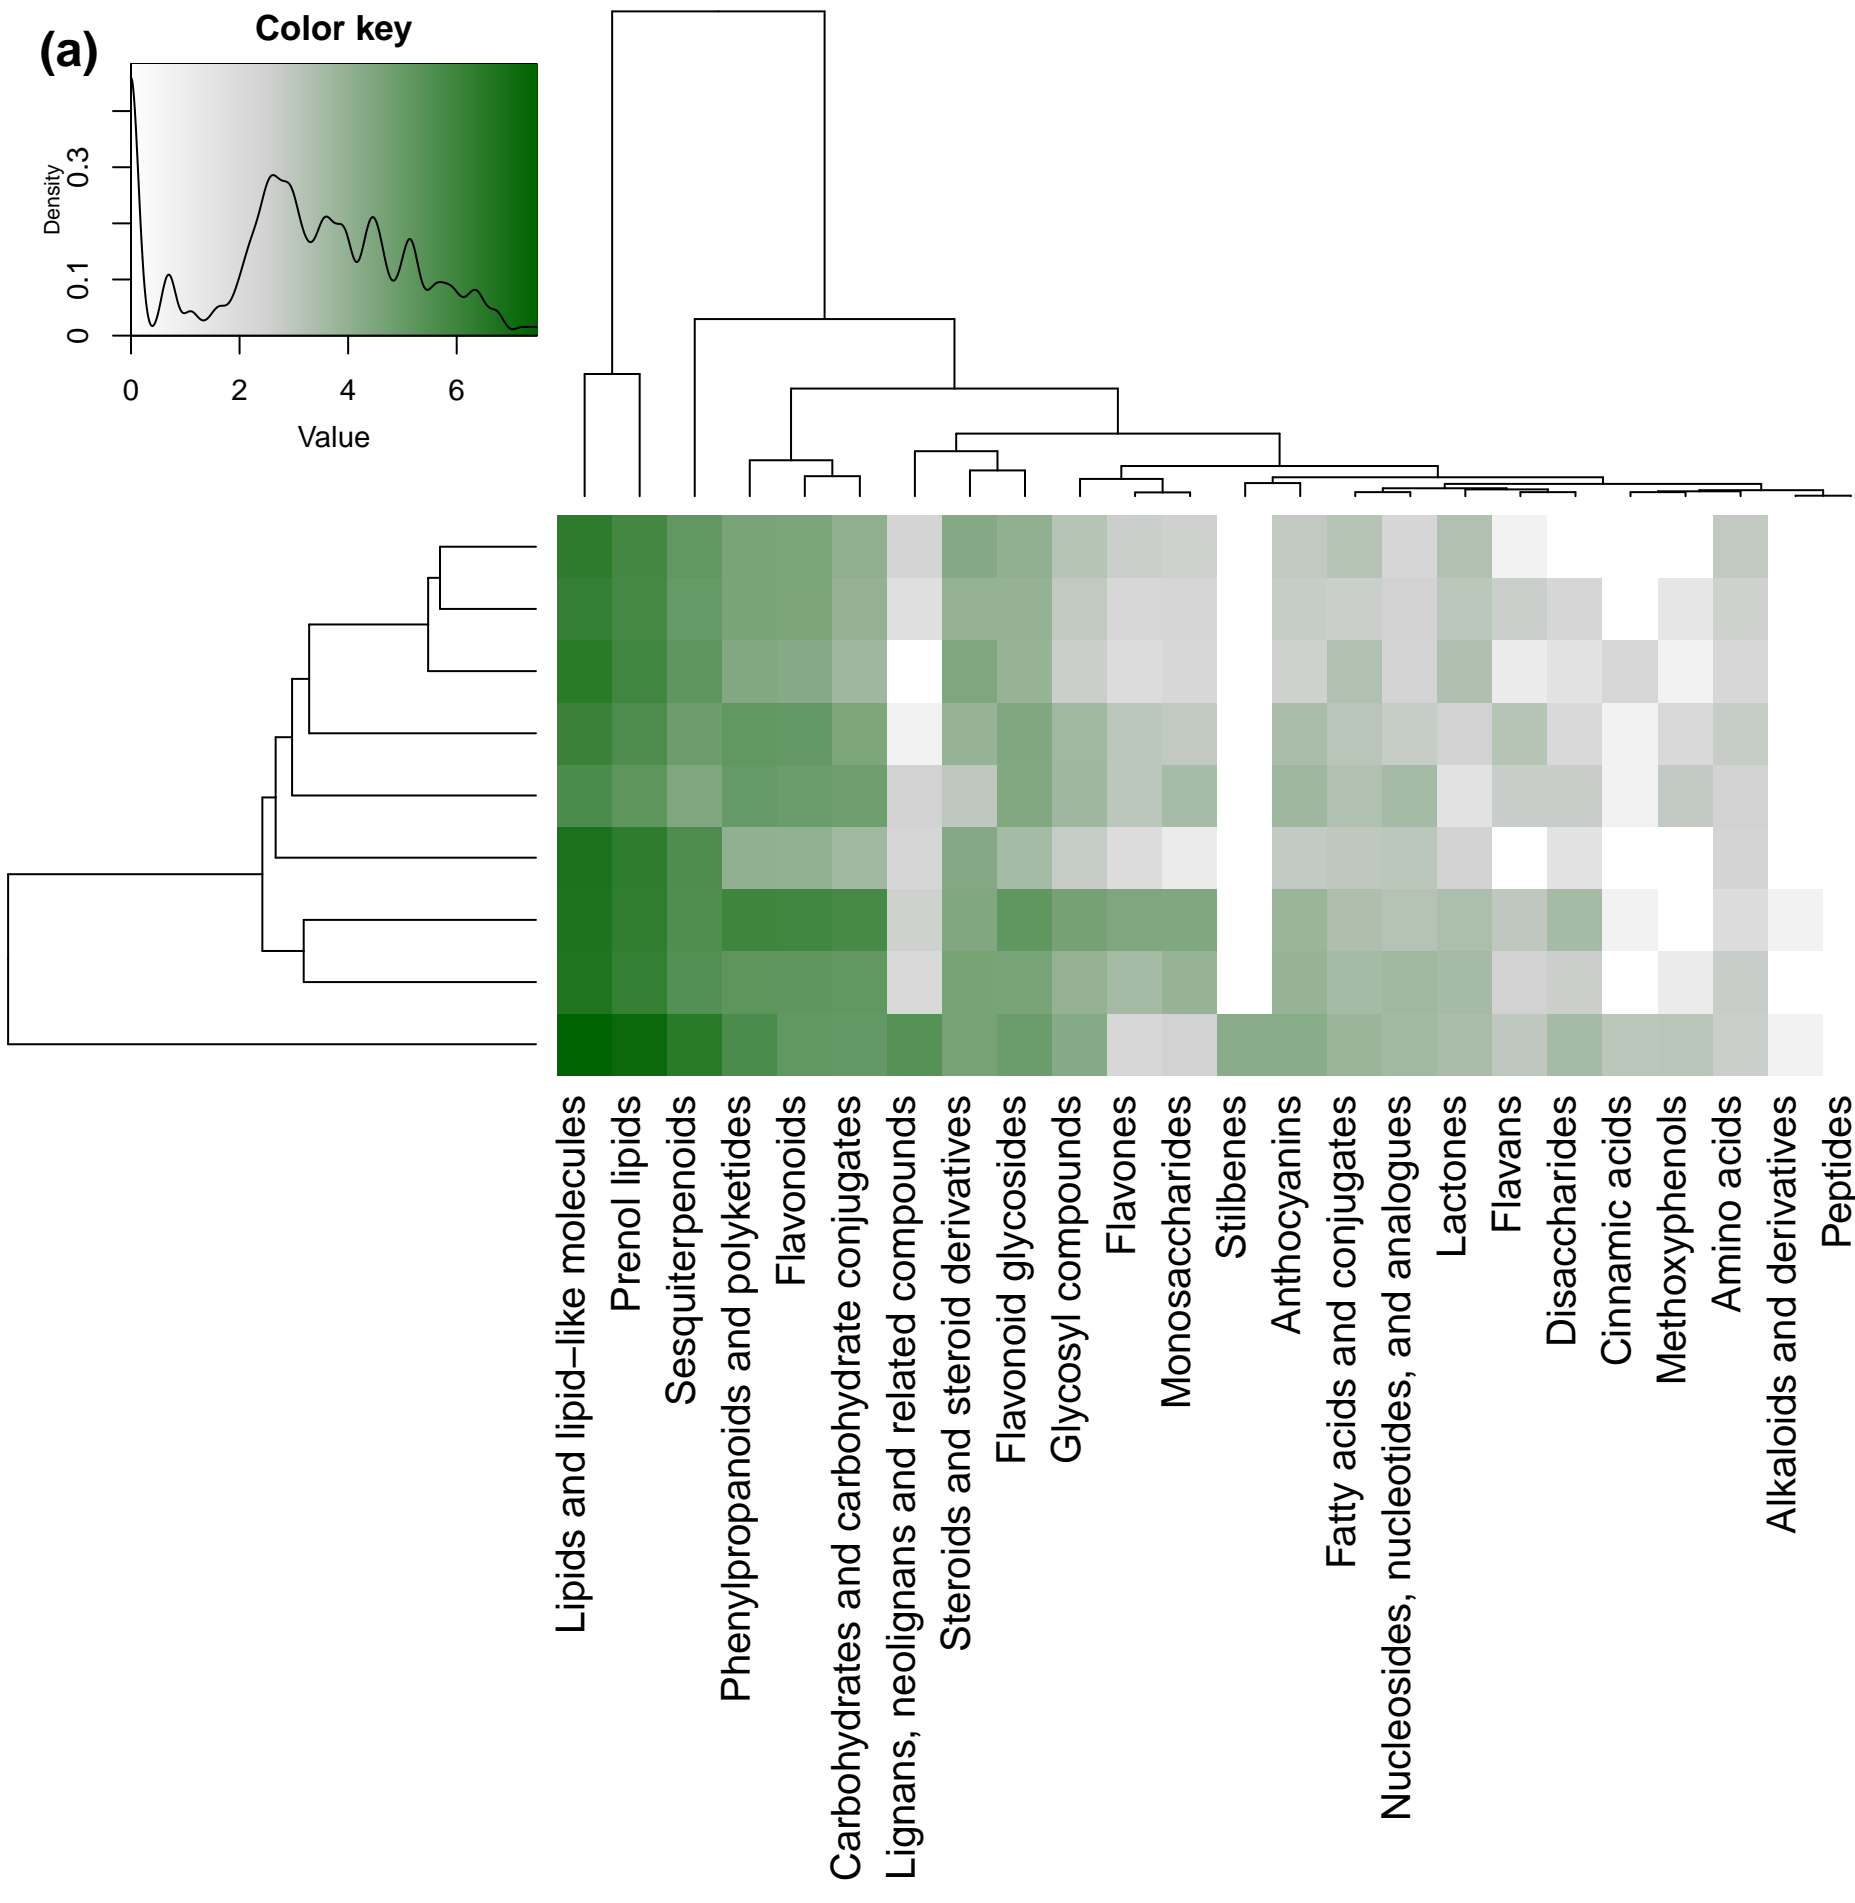

Hypcup  
Calcus  
Brarut  
Rhysqu  
Polstr  
Gripul  
Plaund  
Fistax  
Marpol

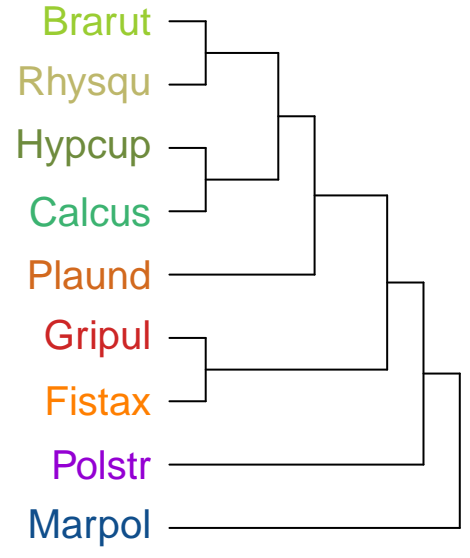

Supplement: s1 [file s1]

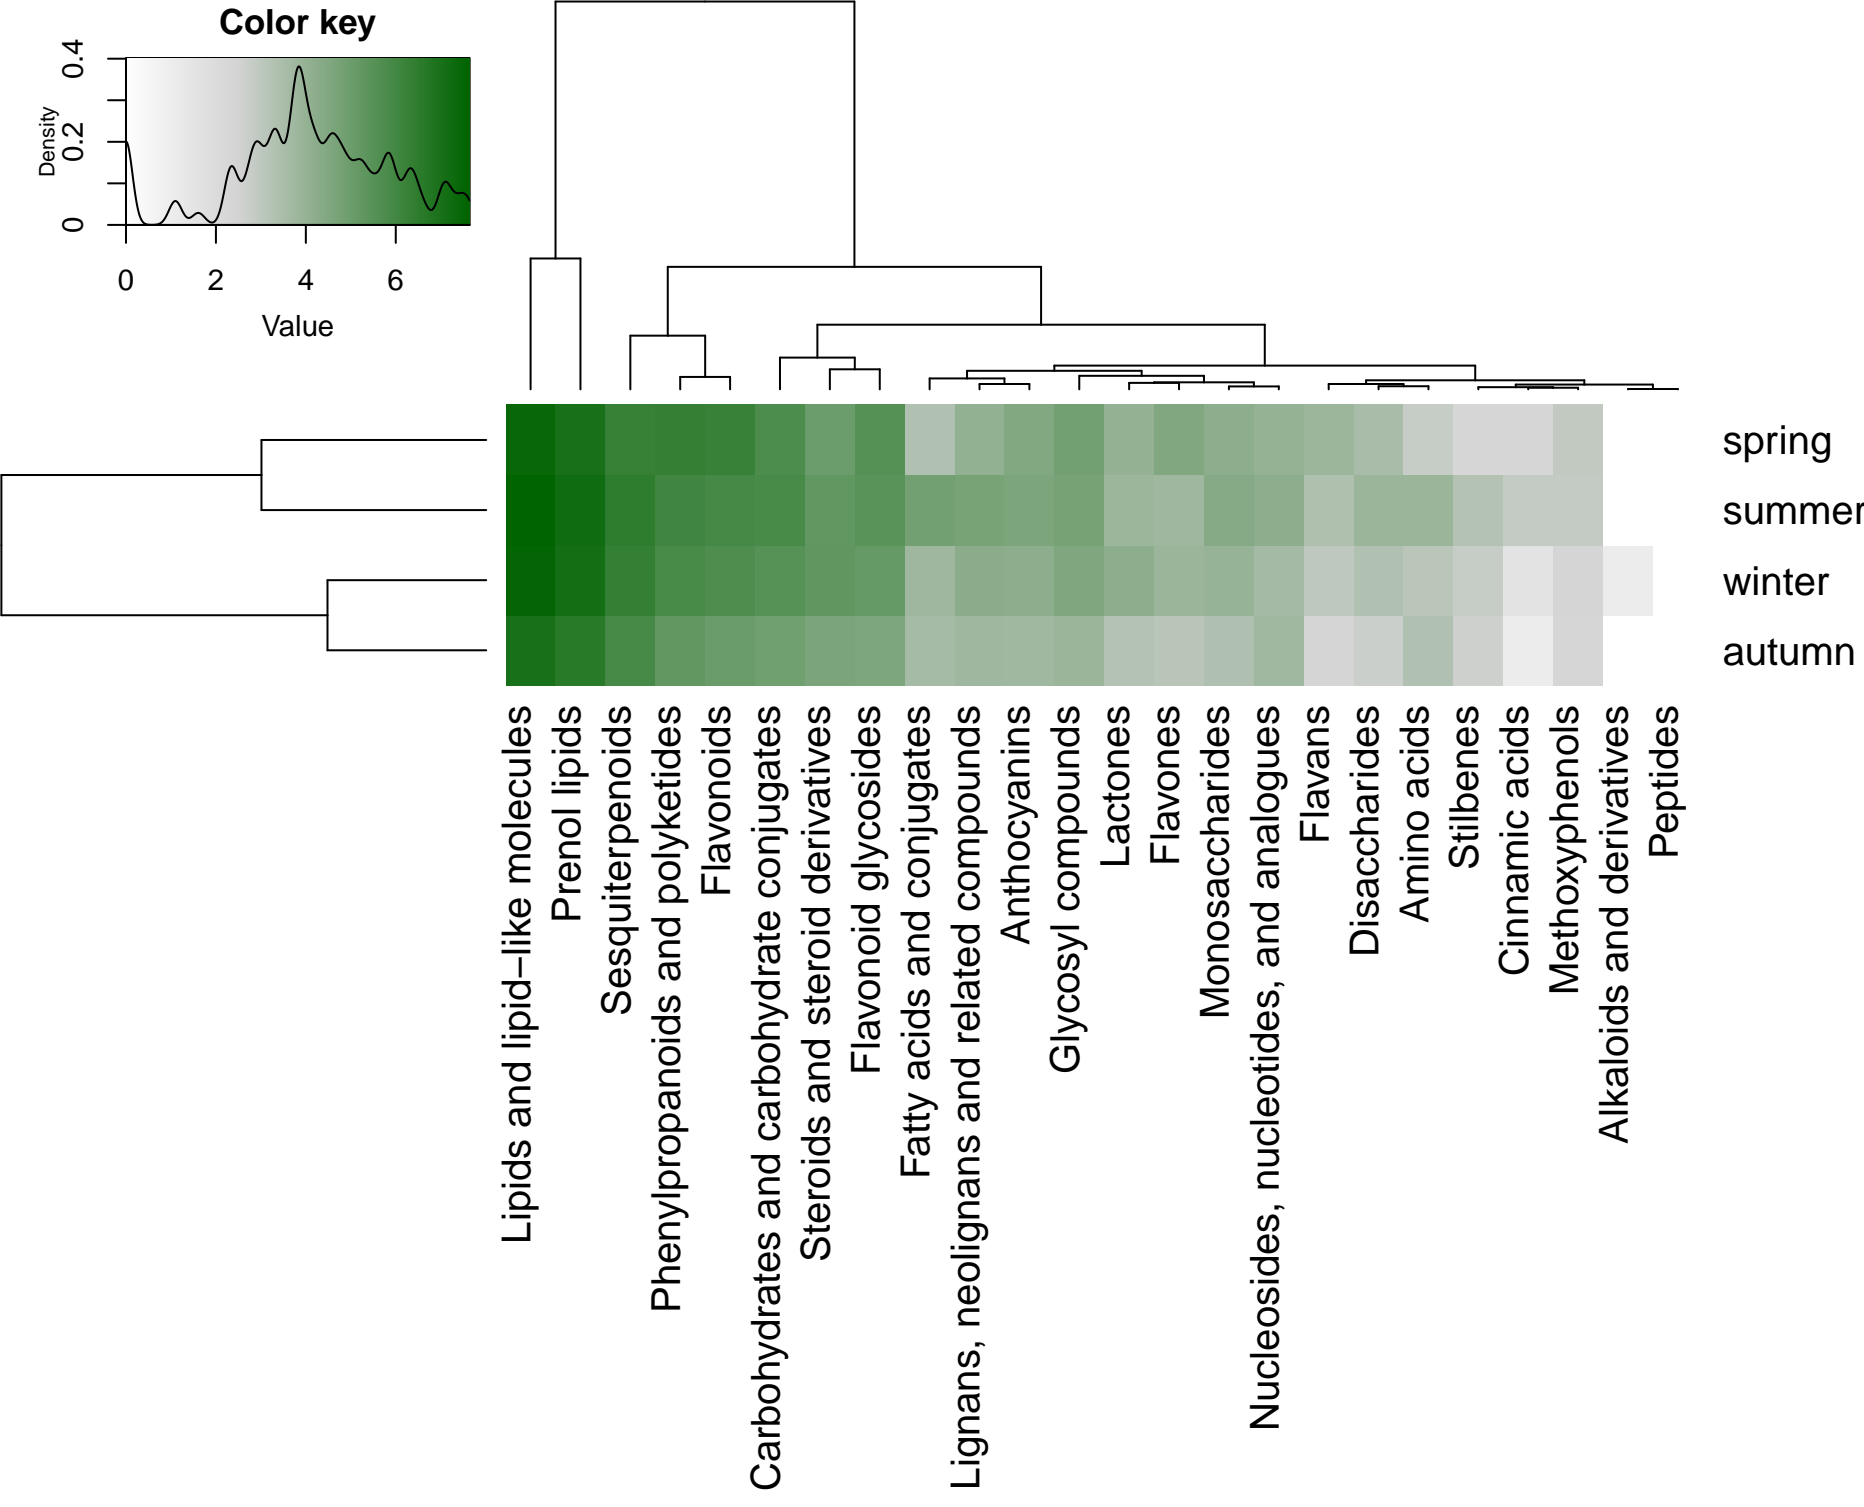

Supplement: s1 [file s1]

# Number of unique features

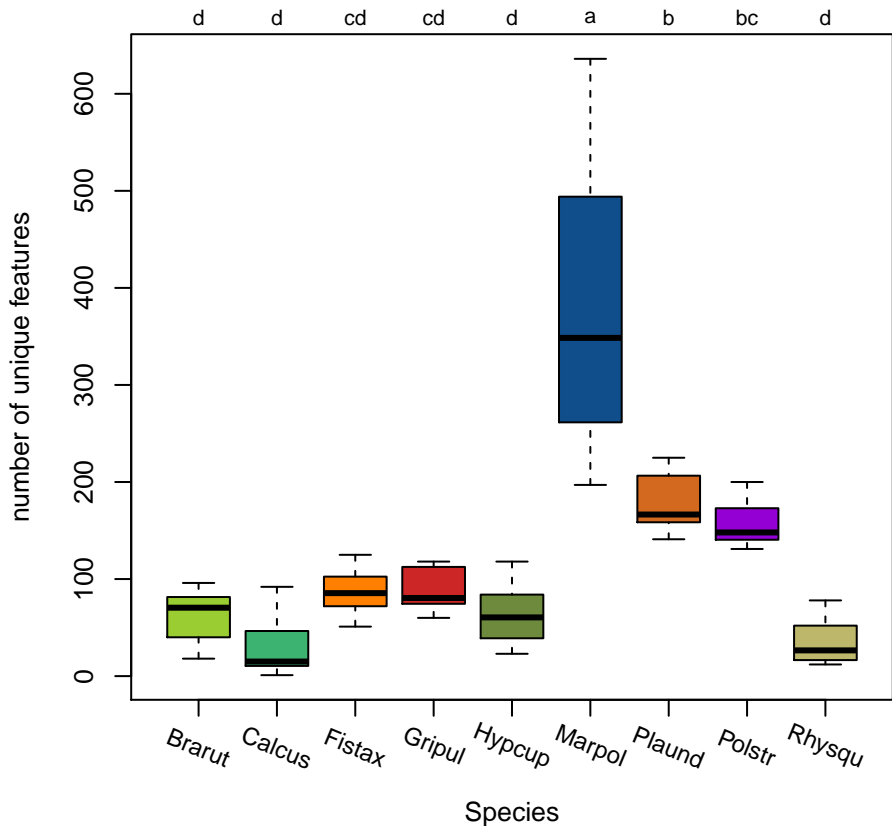

Supplement: s1 [file s1]

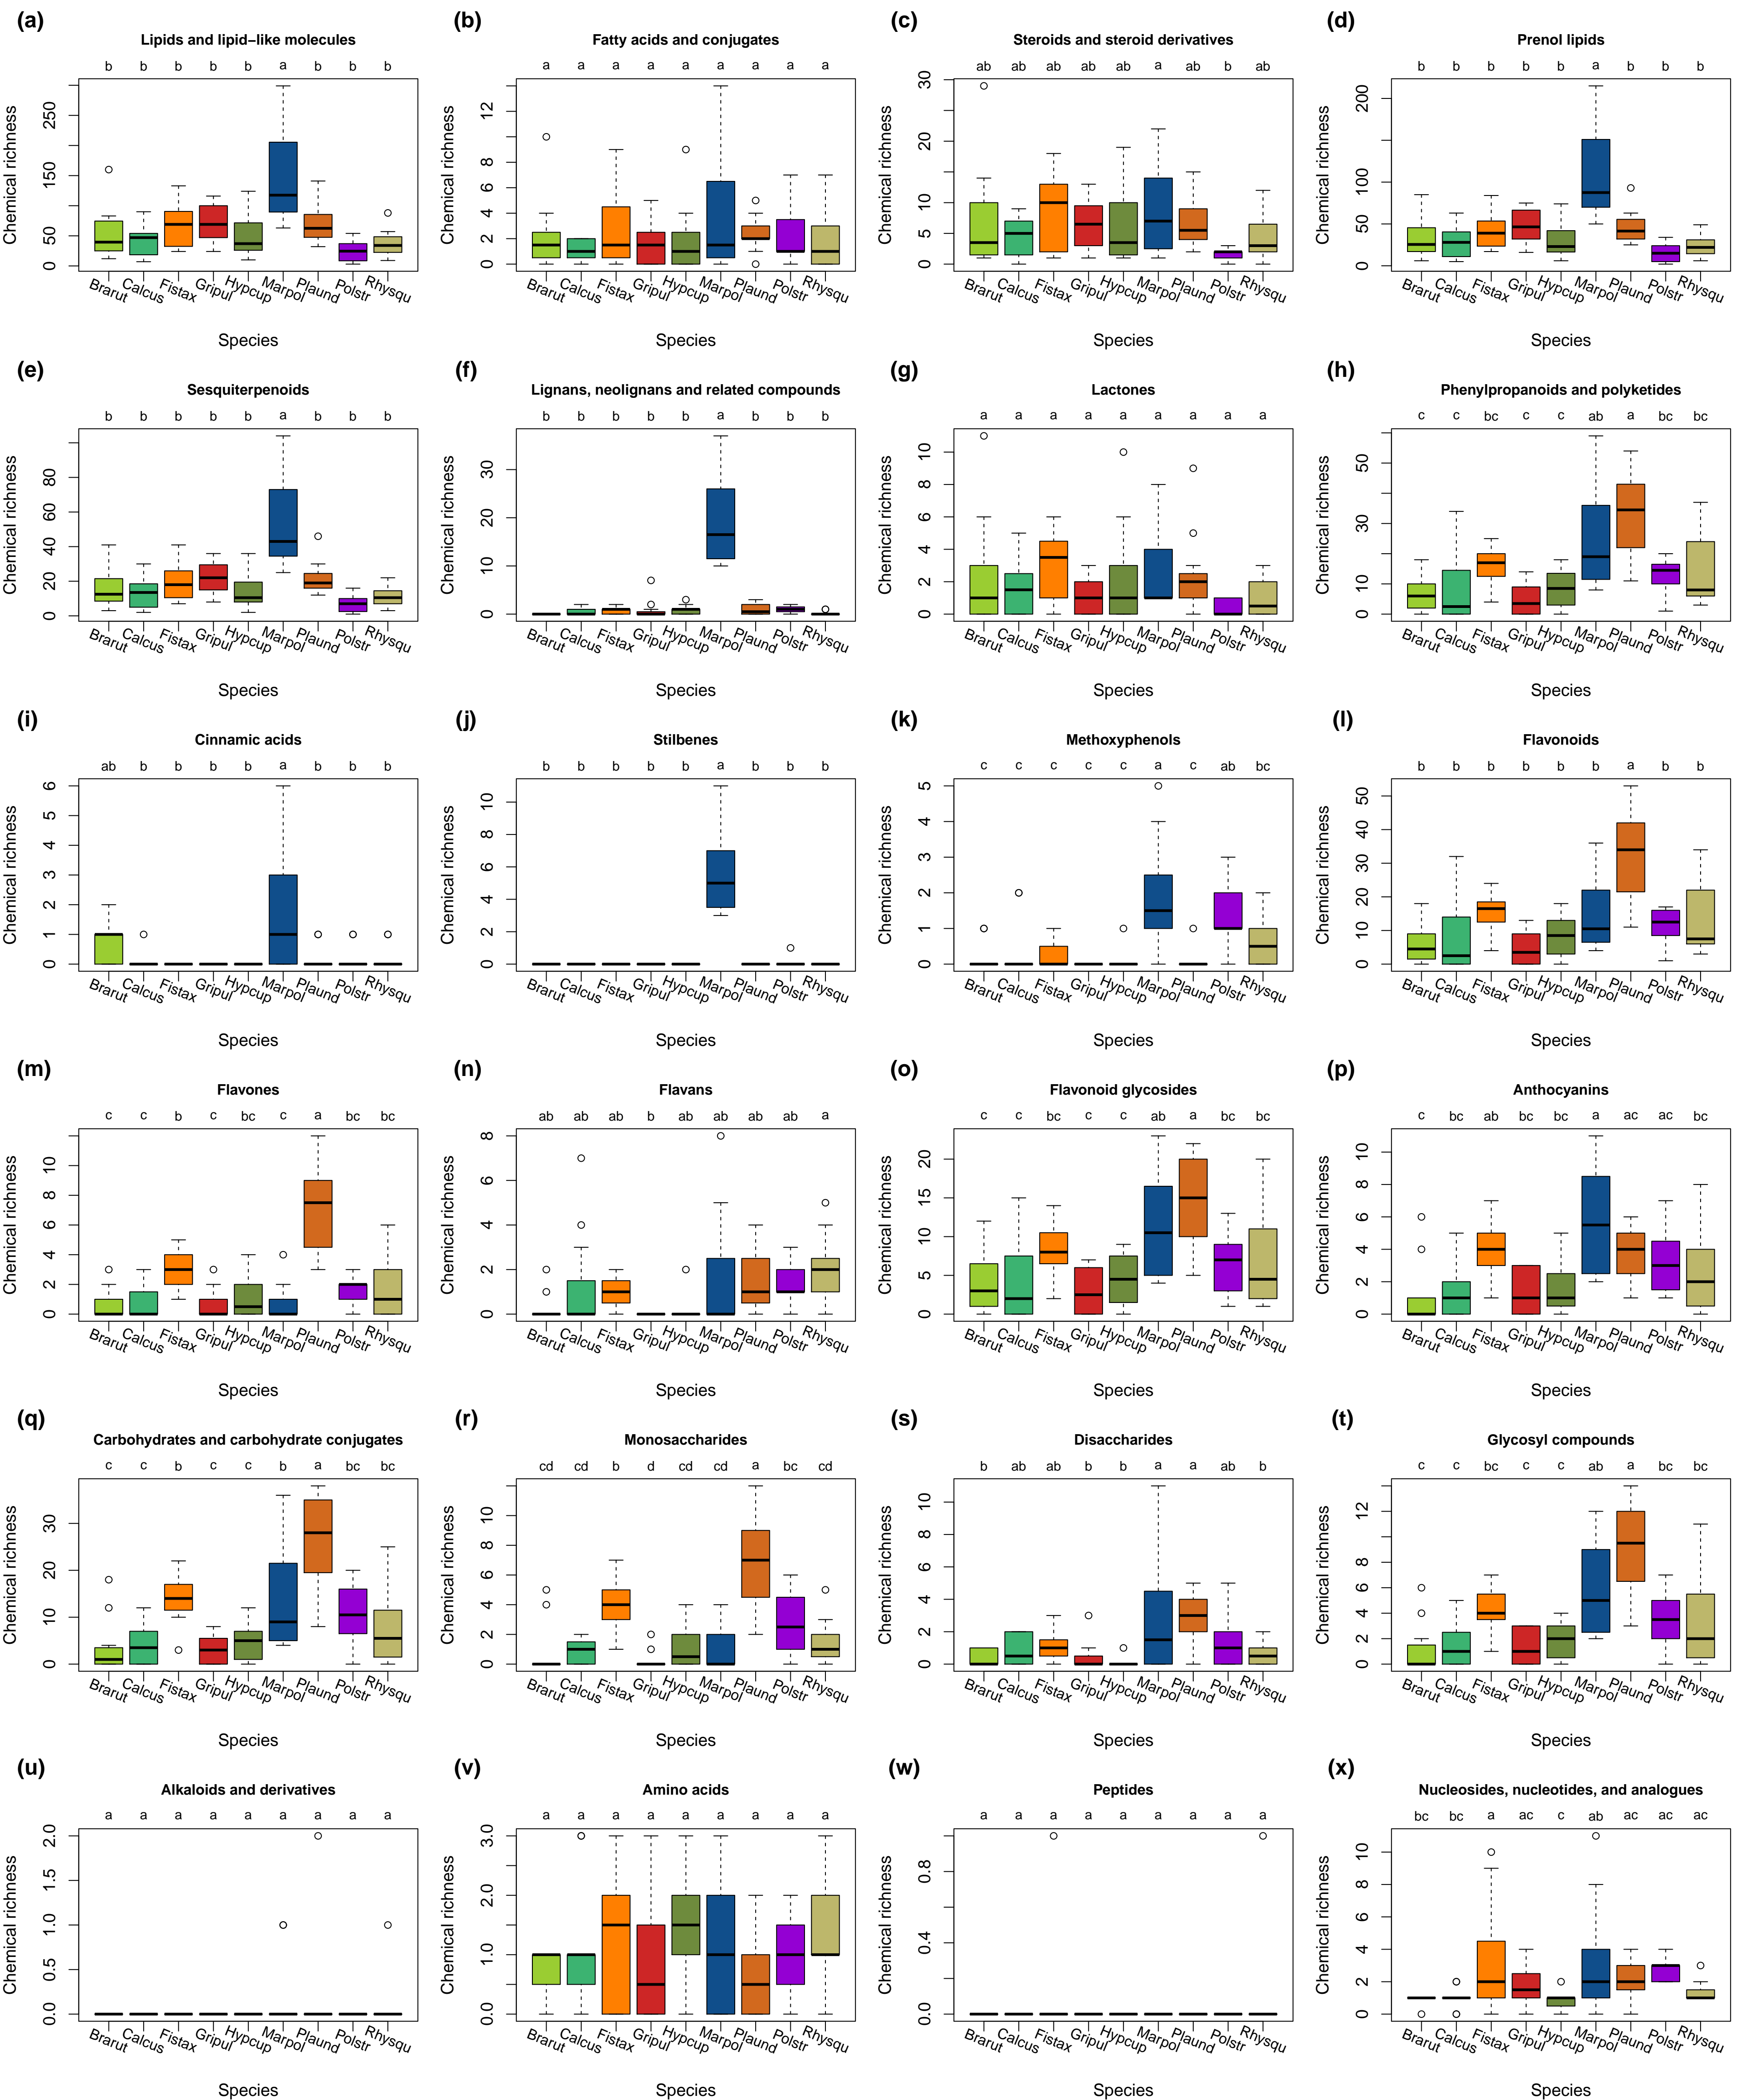

Supplement: s1 [file s1]

# Shannon diversity ( $H'$ )

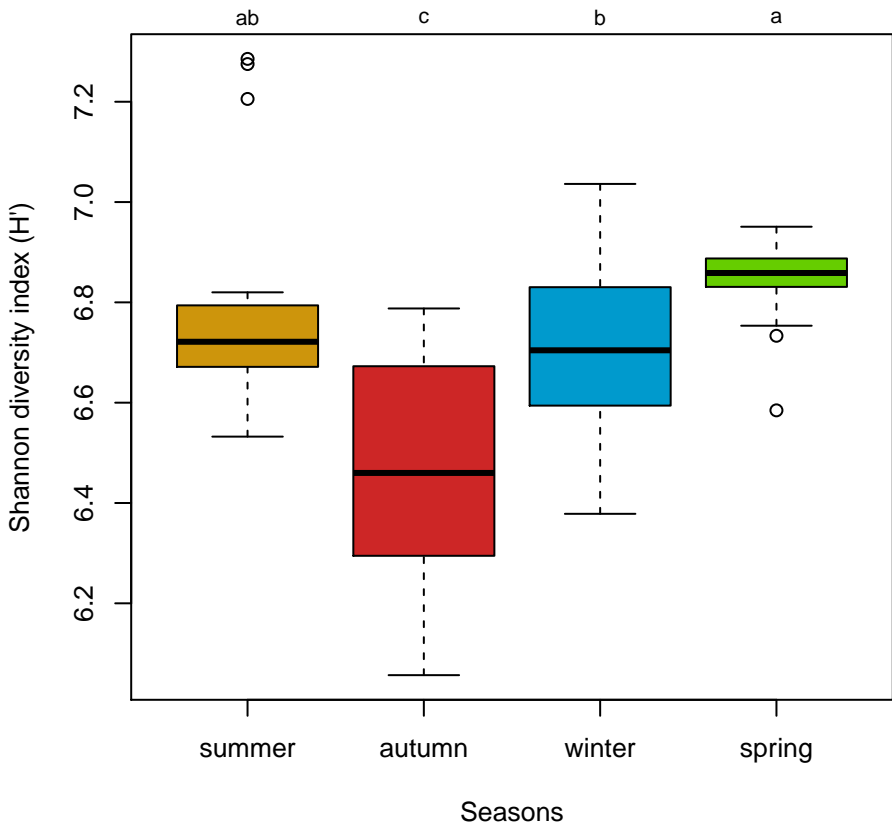

Supplement: s1 [file s1]

# Concentration

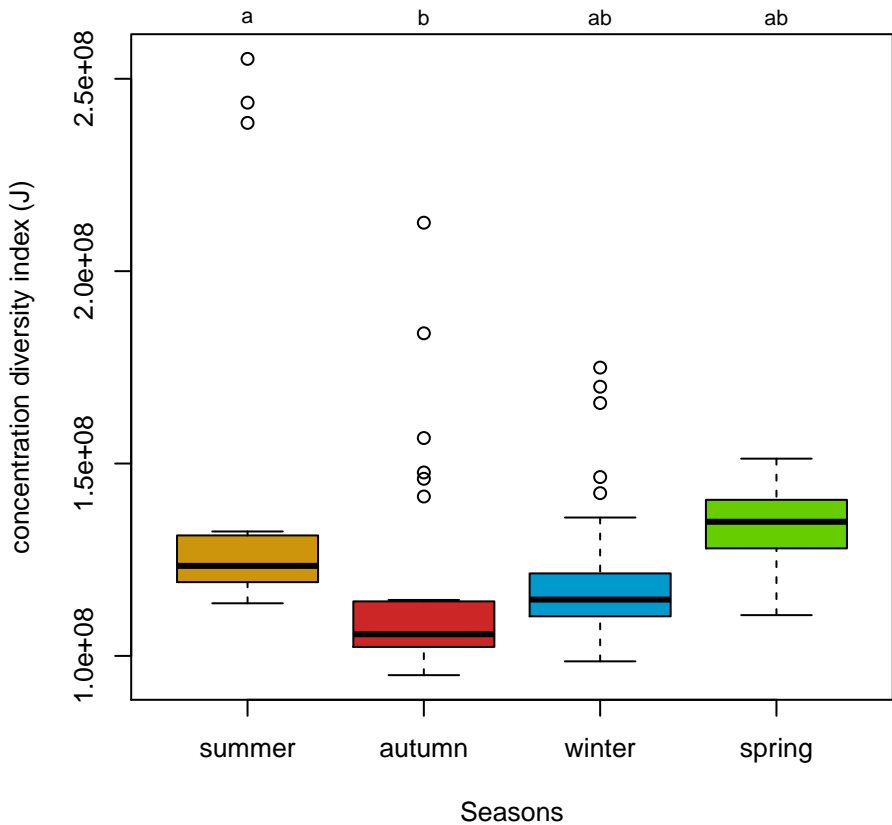

Supplement: s1 [file s1]

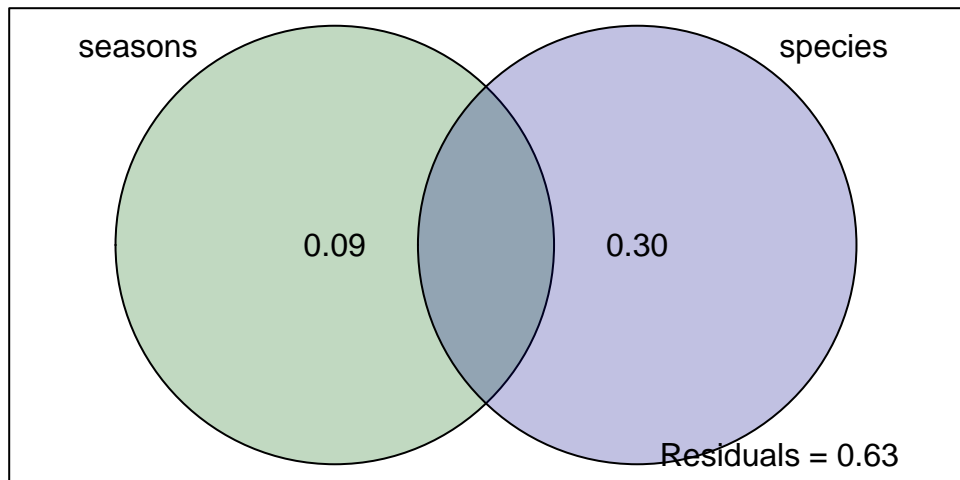

Values <0 not shown

Supplement: s1 [file s1]

# Concentration

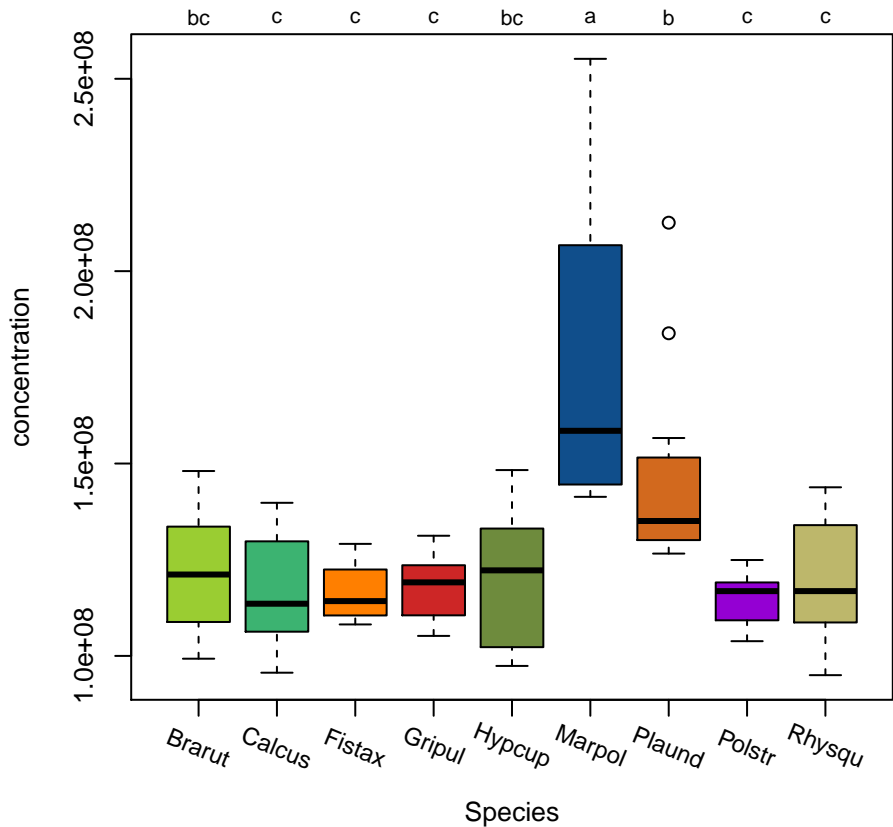

Supplement: s1 [file s1]

## Pielou's evenness

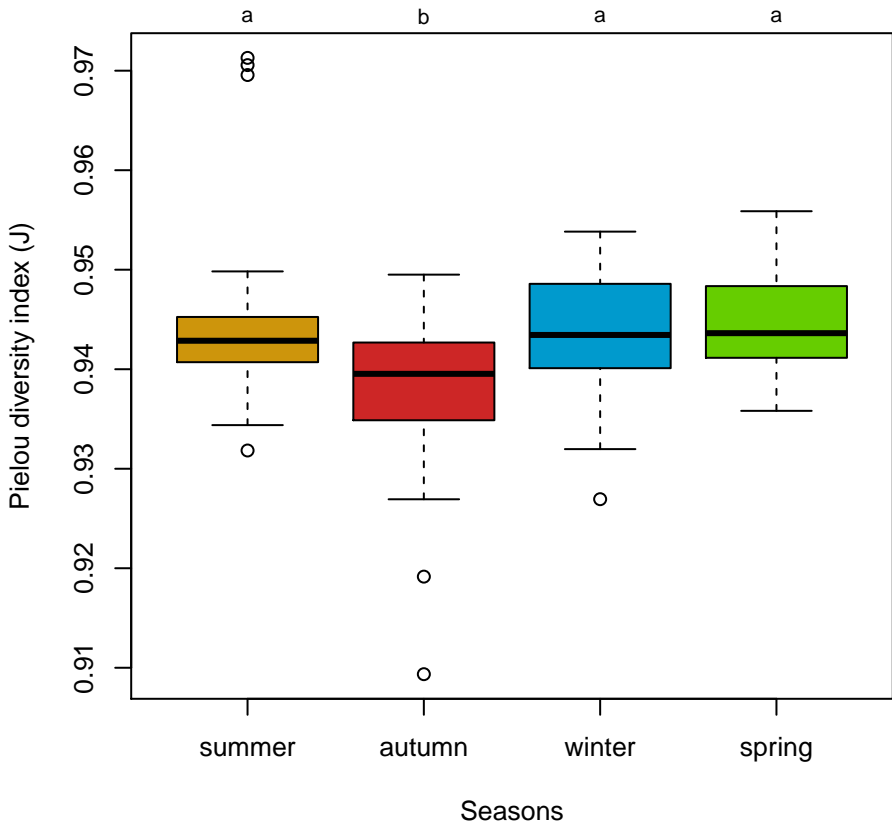

Supplement: s1 [file s1]

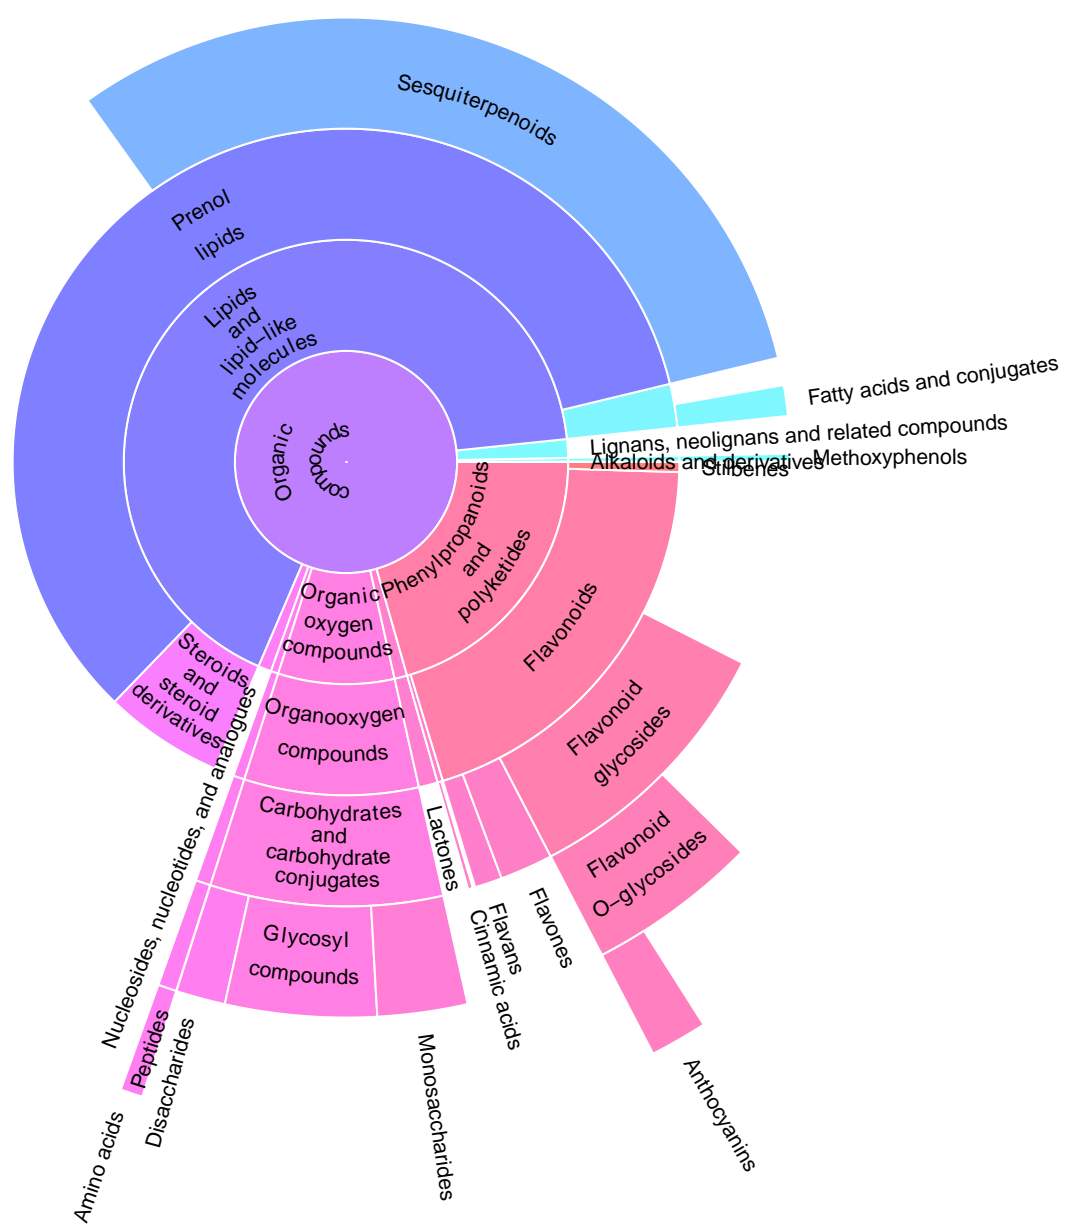

Supplement: s1 [file s1]

## Pielou's evenness

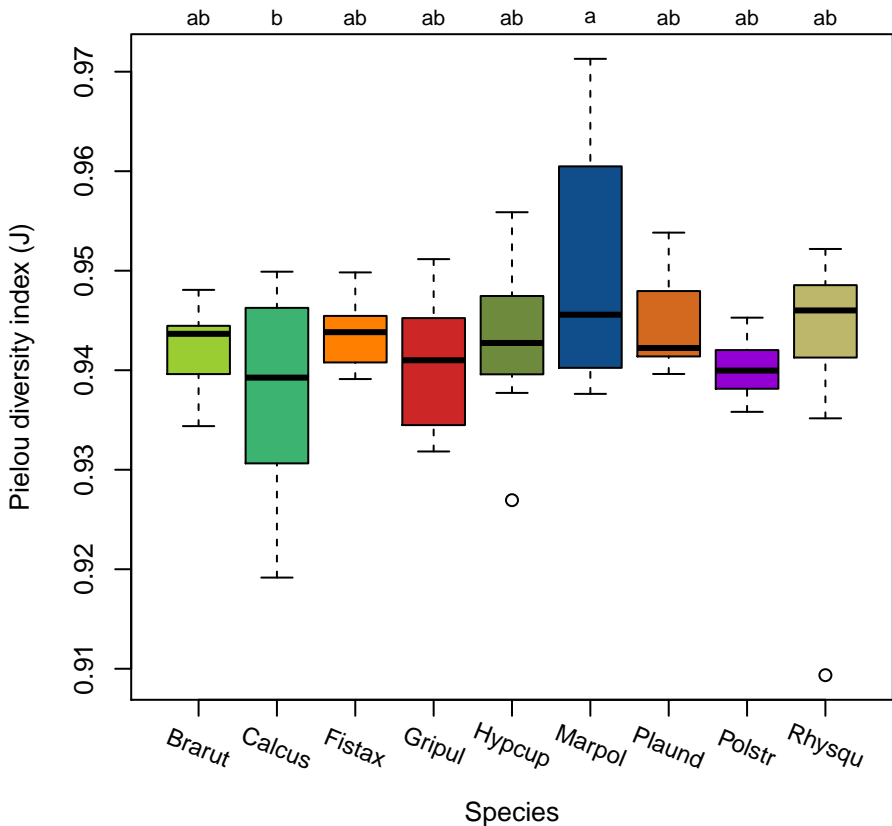

Supplement: s1 [file s1]

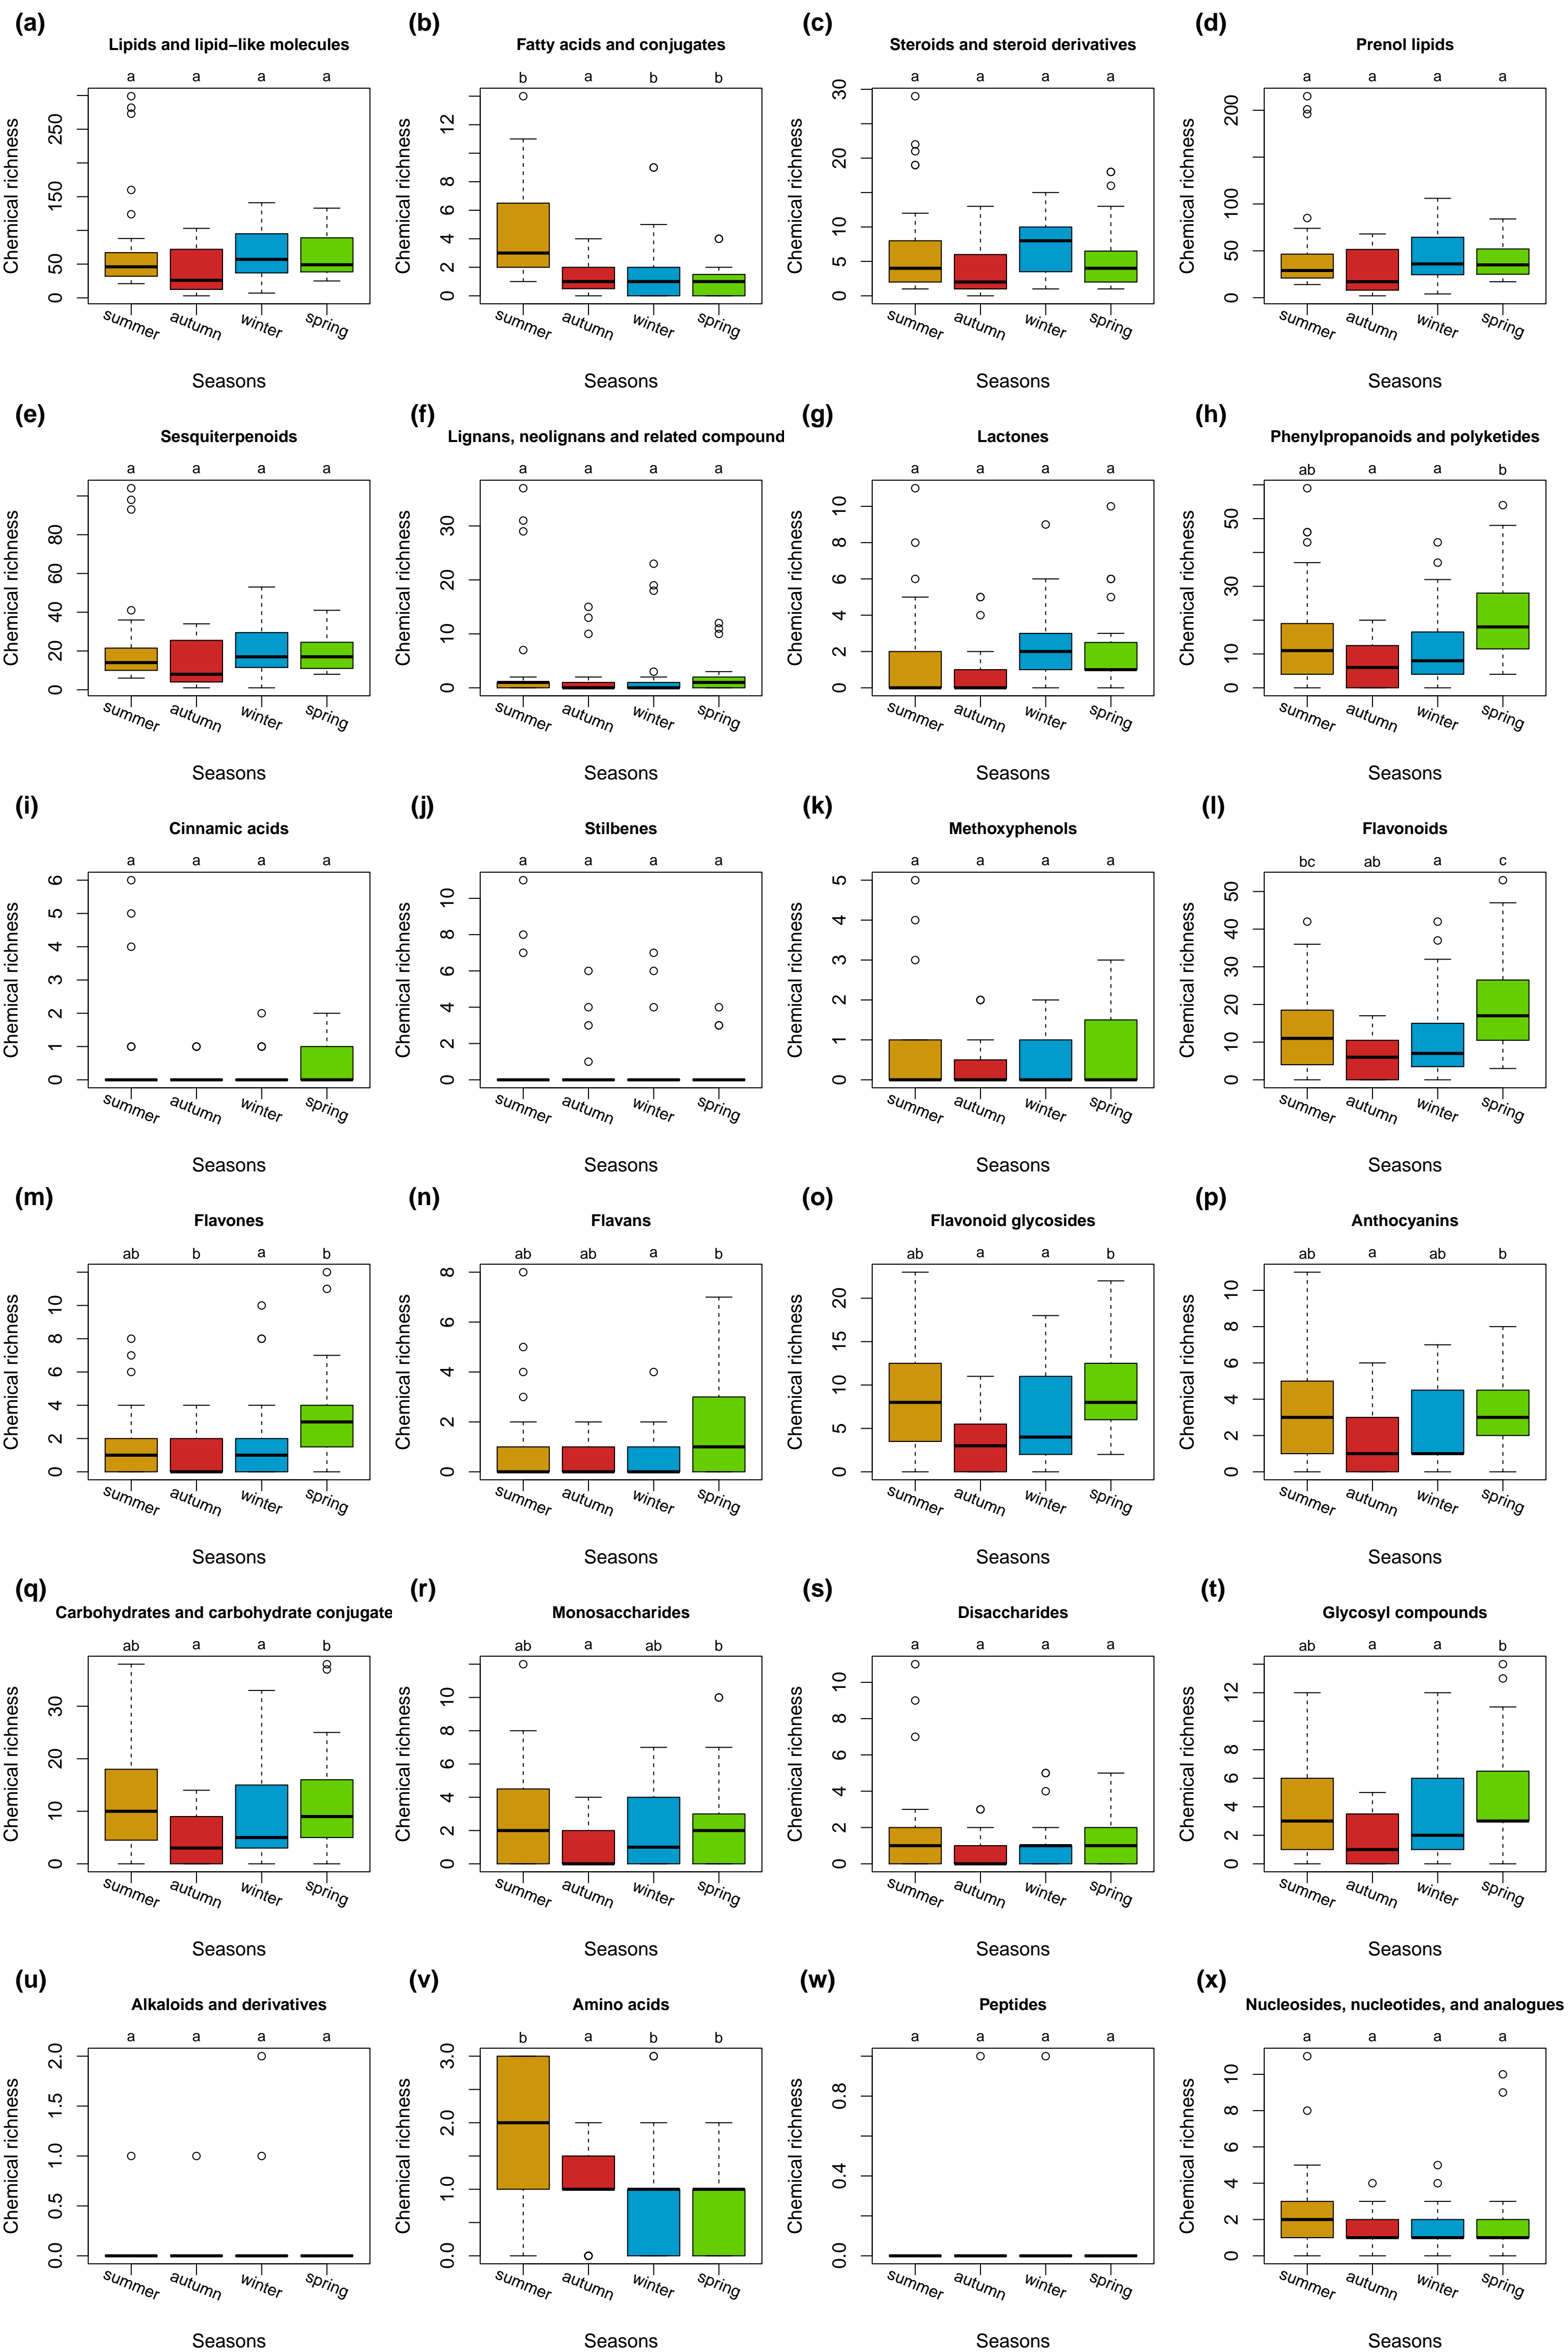

Supplement: s1 [file s1]

# Number of unique features

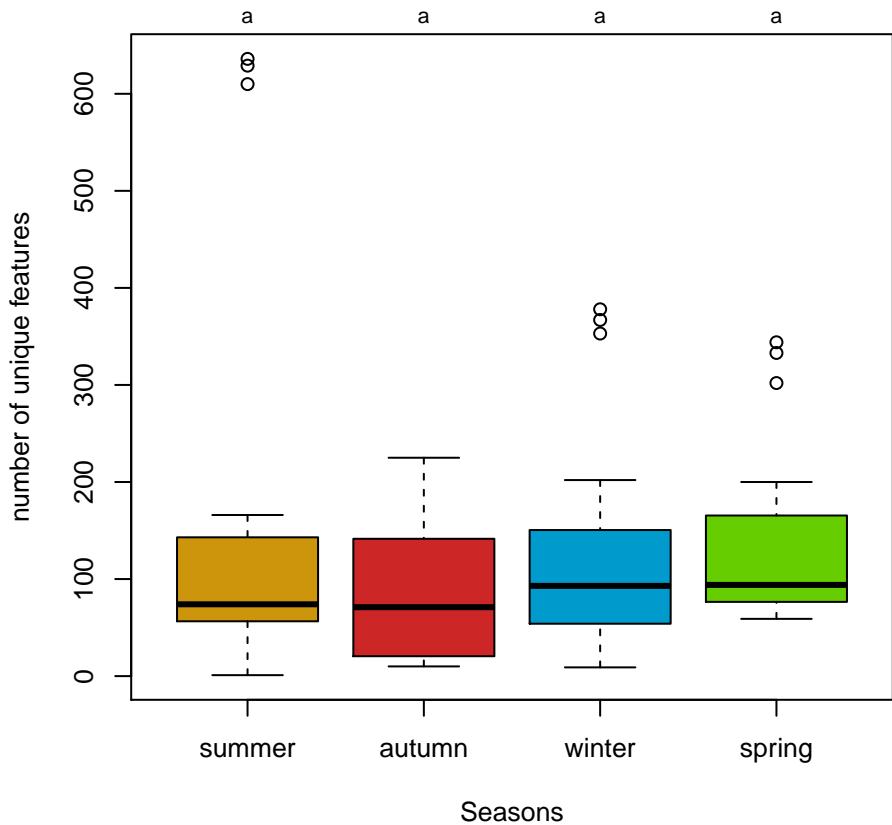

Supplement: s1 [file s1]

# Shannon diversity ( $H'$ )

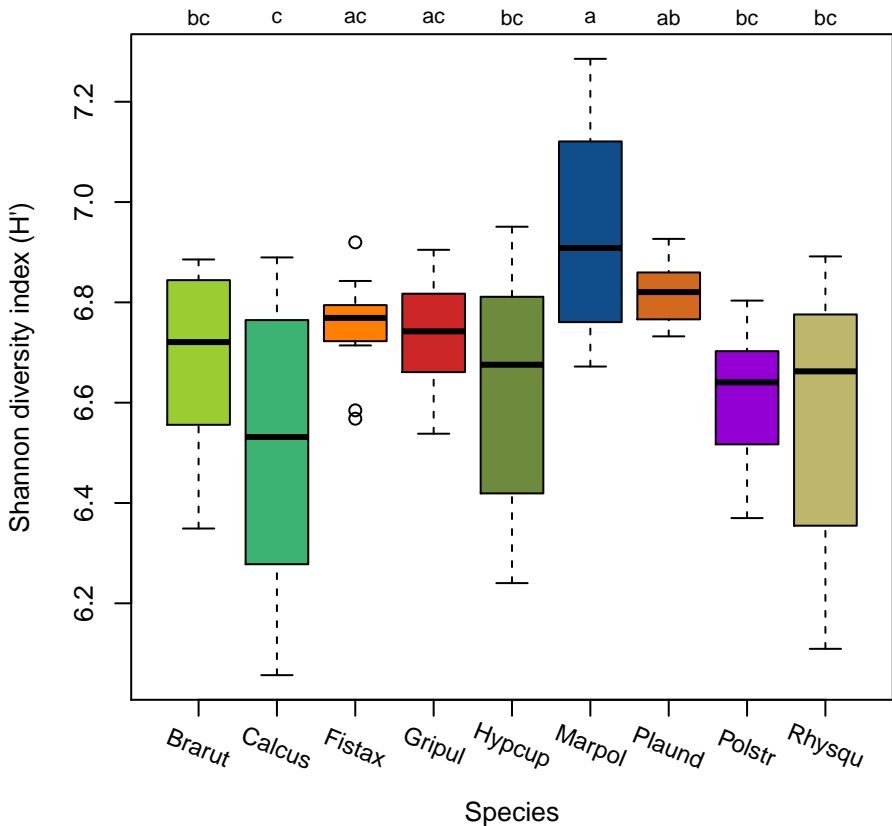

Supplement: s1 [file s1]

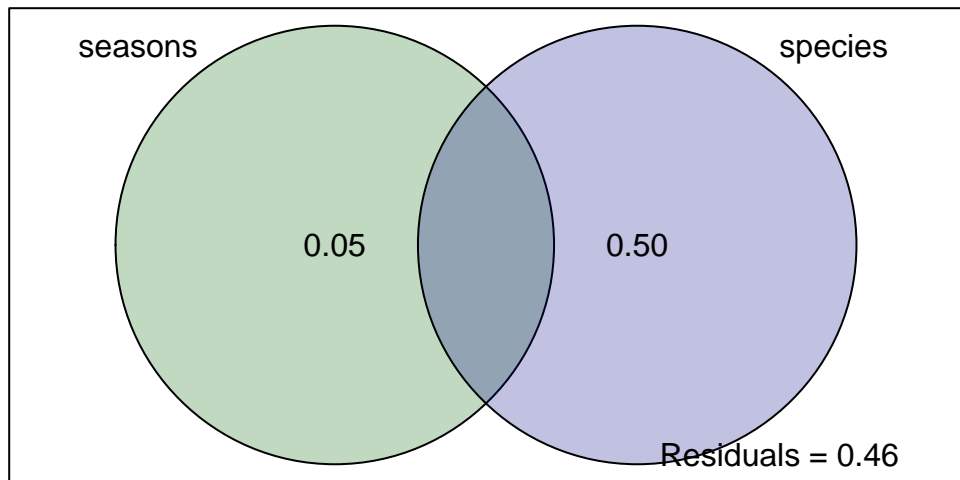

Values <0 not shown

Supplement: s1 [file s1]
